# Supplementary material for: Side Chain-modified Benzothiazinone Derivatives with Anti-Mycobacterial Activity
Source: Preprints.org preprint supplement (doi:10.20944/preprints202305.1839.v1), 2023-05-26

<sup>1</sup>H NMR of Compound 1

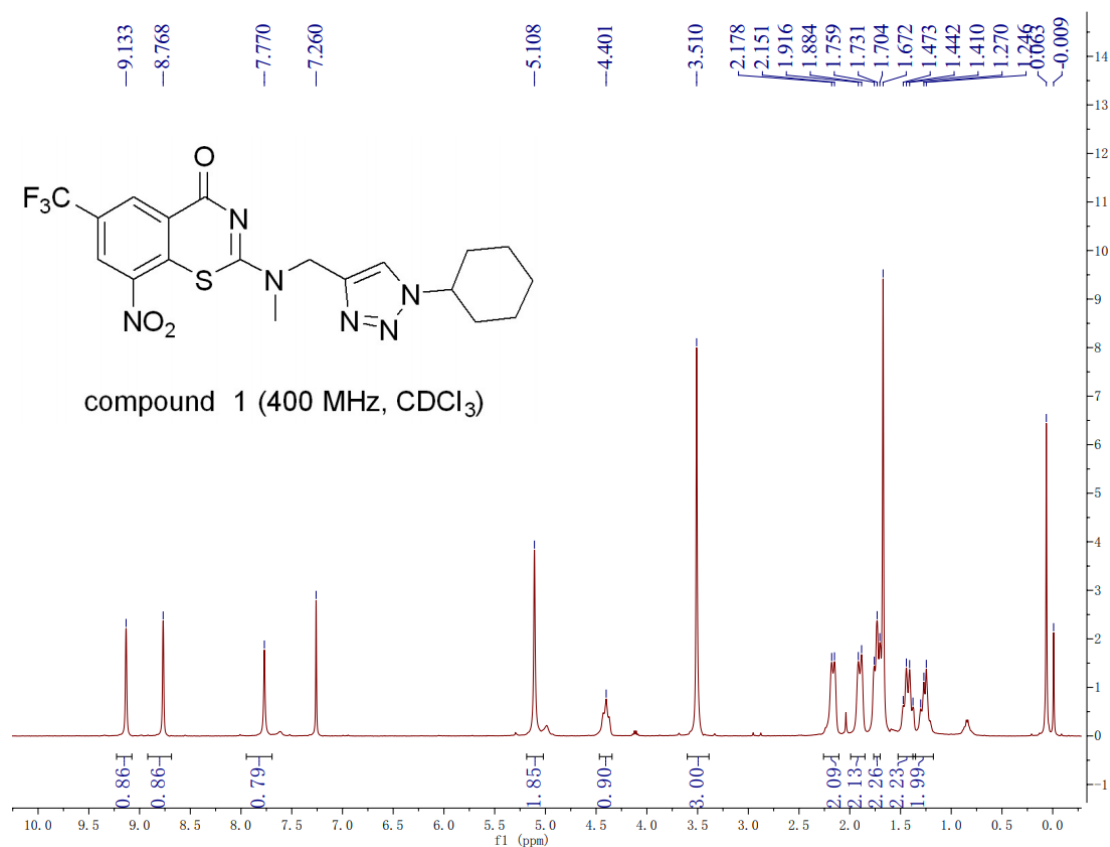

<sup>13</sup>C NMR of Compound 1

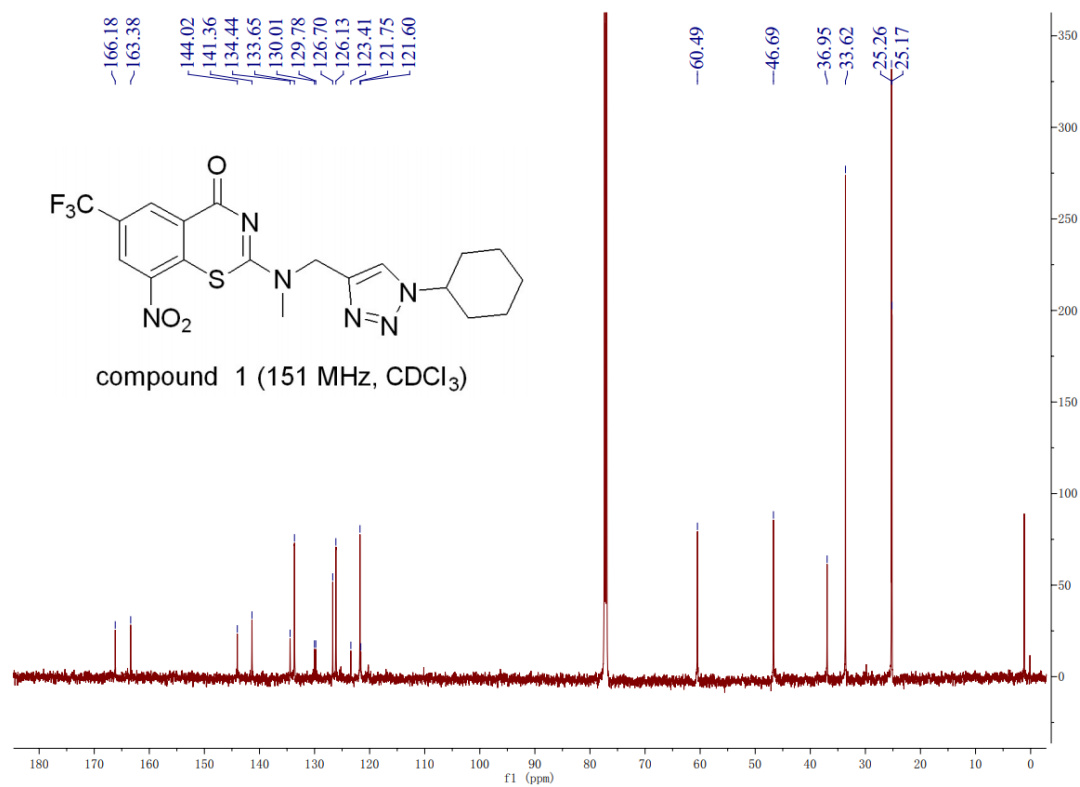

<sup>1</sup>H NMR of Compound 2

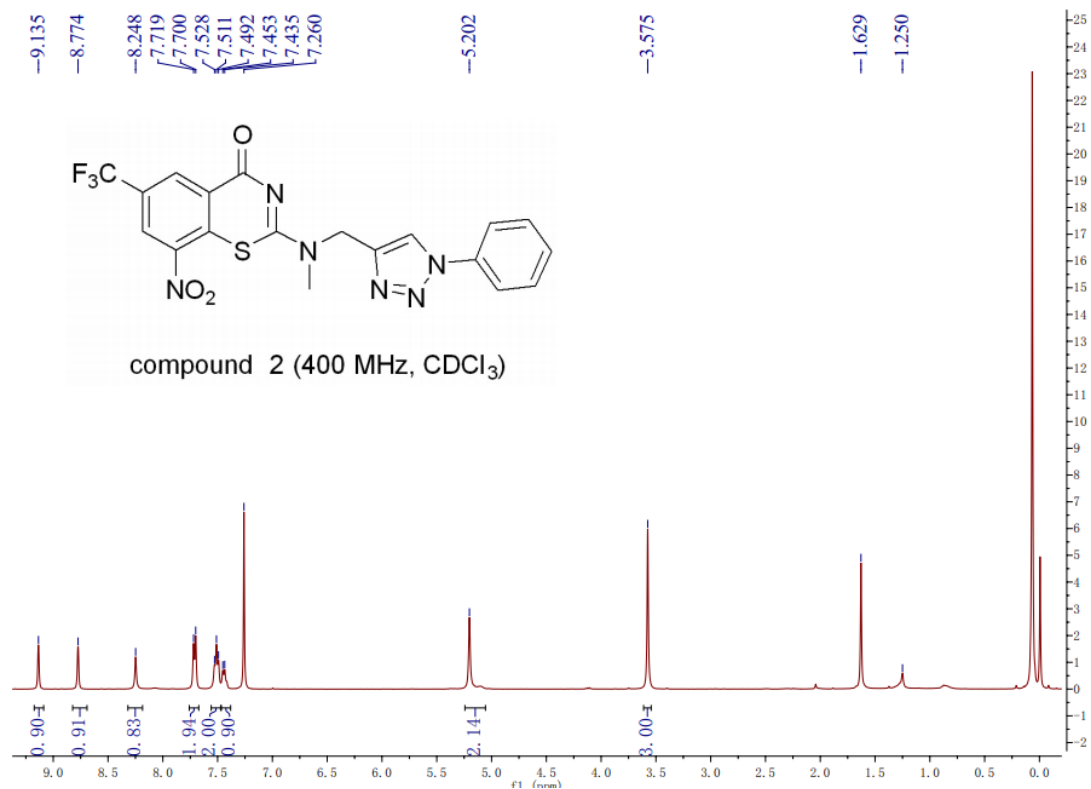

<sup>13</sup>C NMR of Compound 2

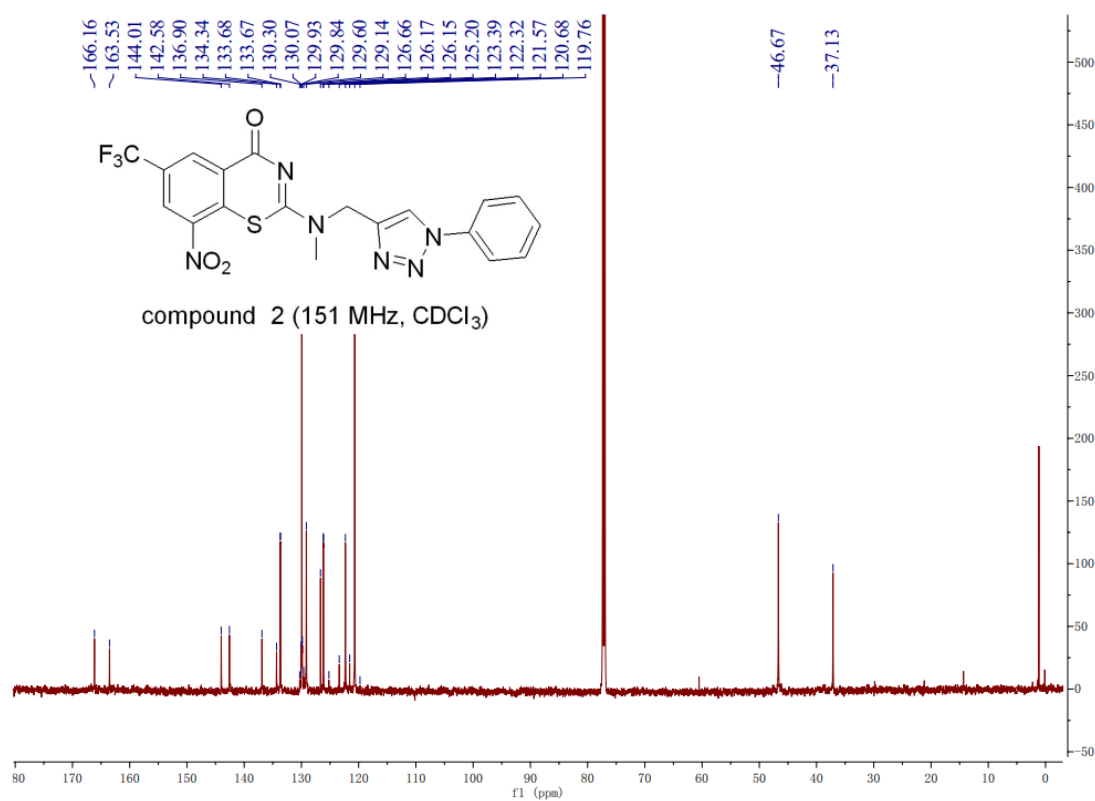

<sup>1</sup>H NMR of Compound 3

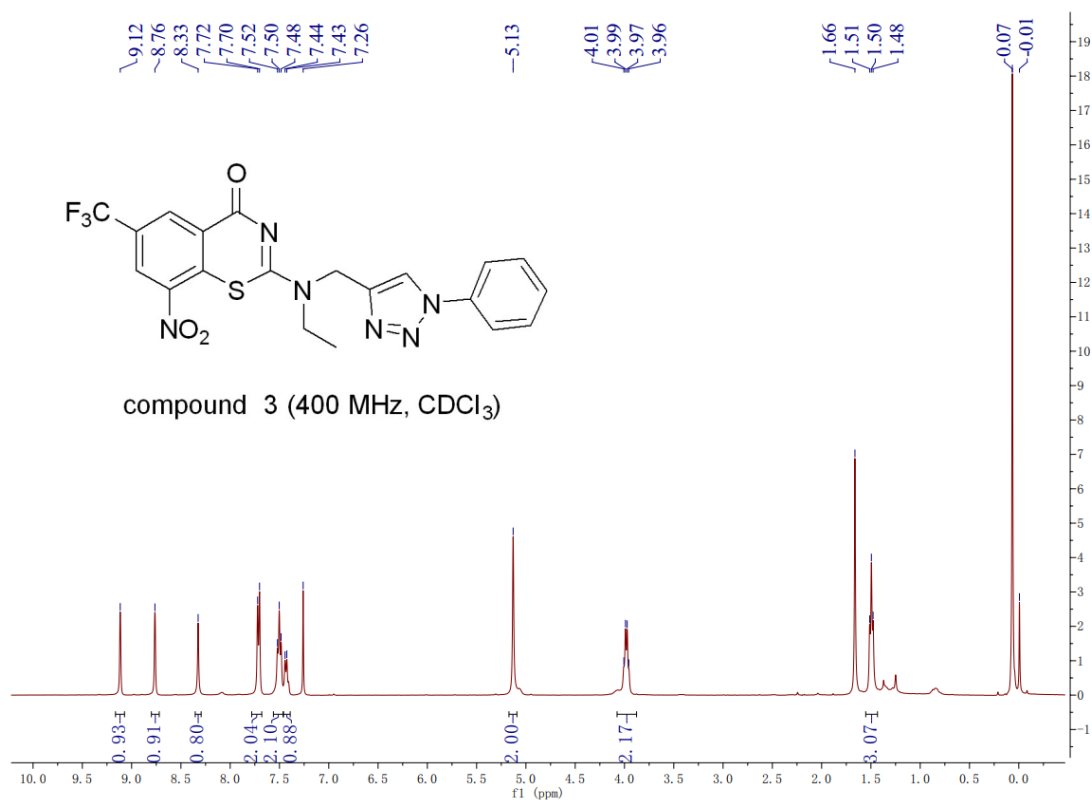

<sup>13</sup>C NMR of Compound 3

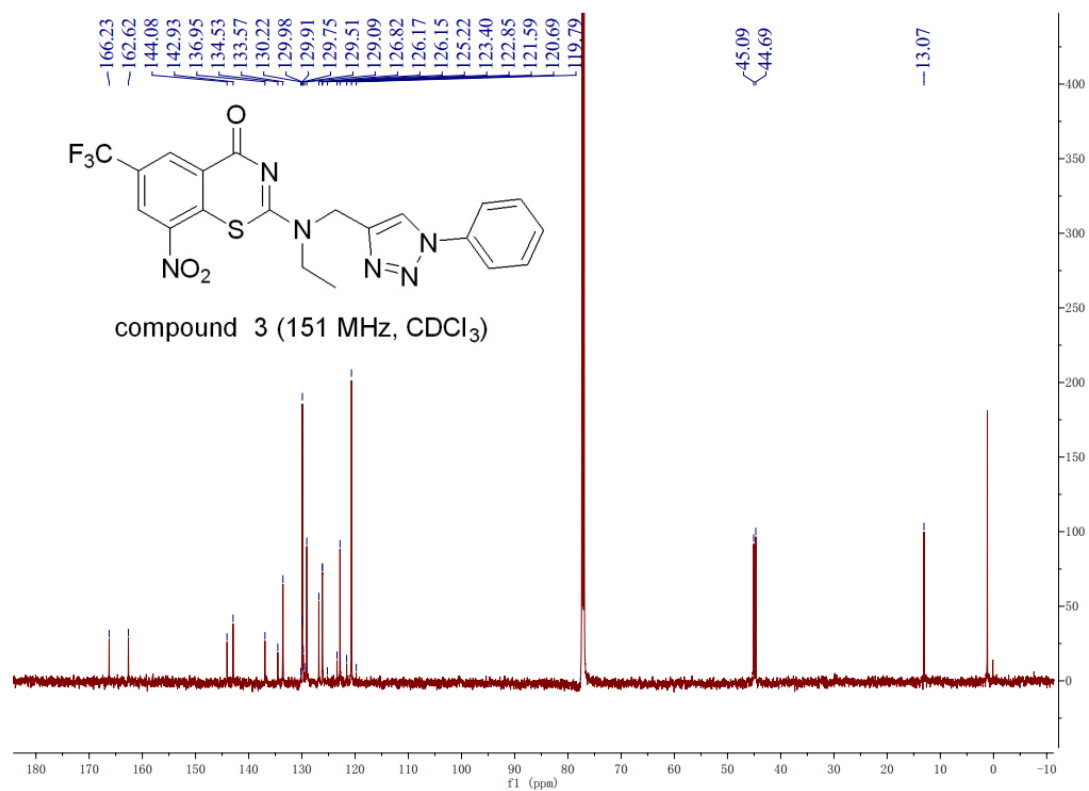

<sup>1</sup>H NMR of Compound 4

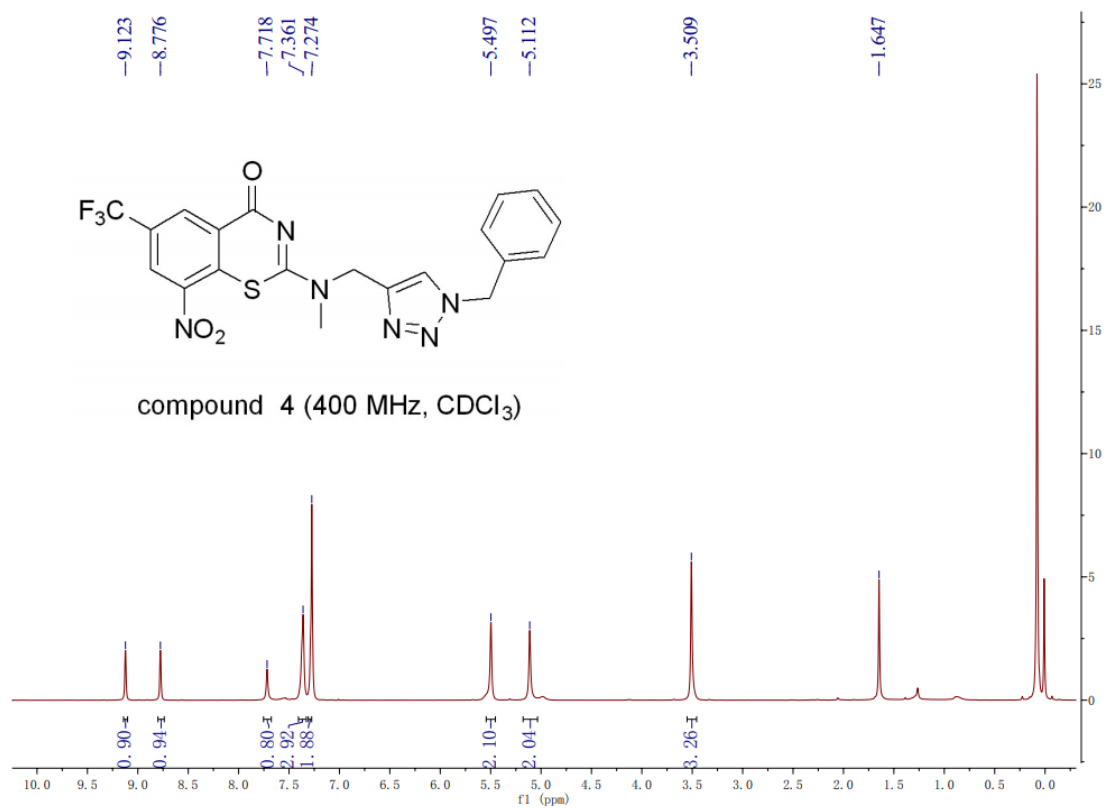

$^{13}\text{C}$  NMR of Compound 4

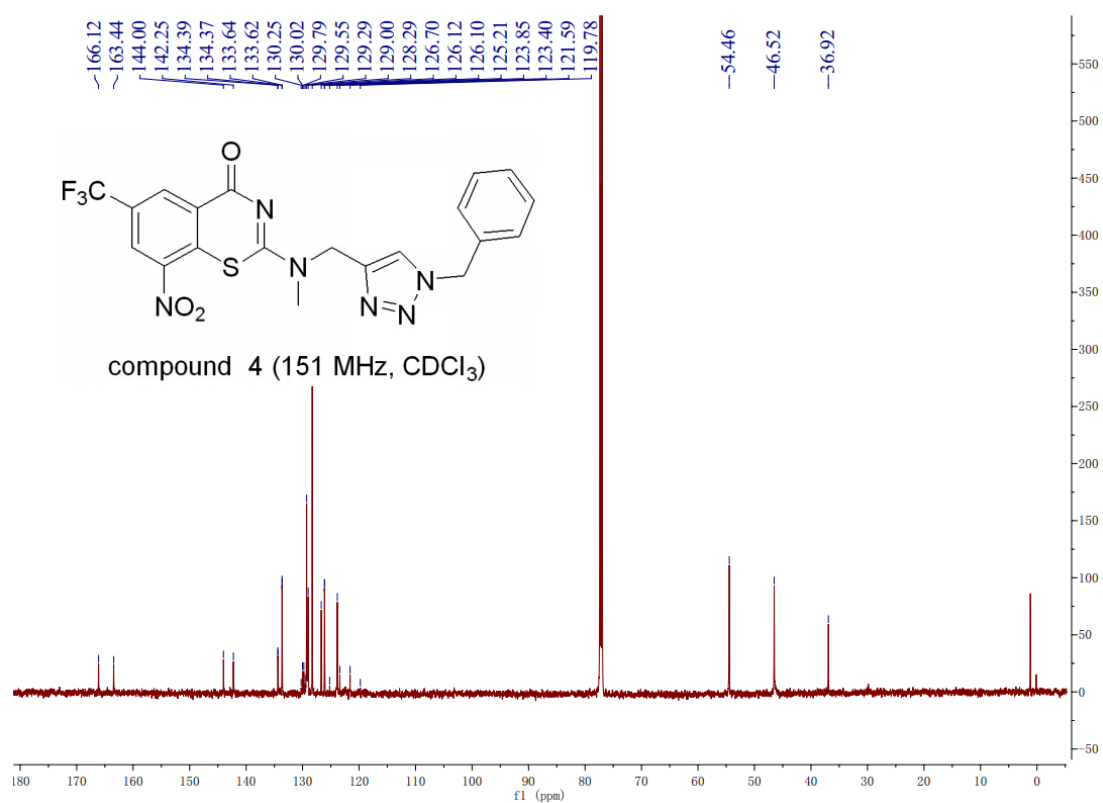

### <sup>1</sup>H NMR of Compound 5

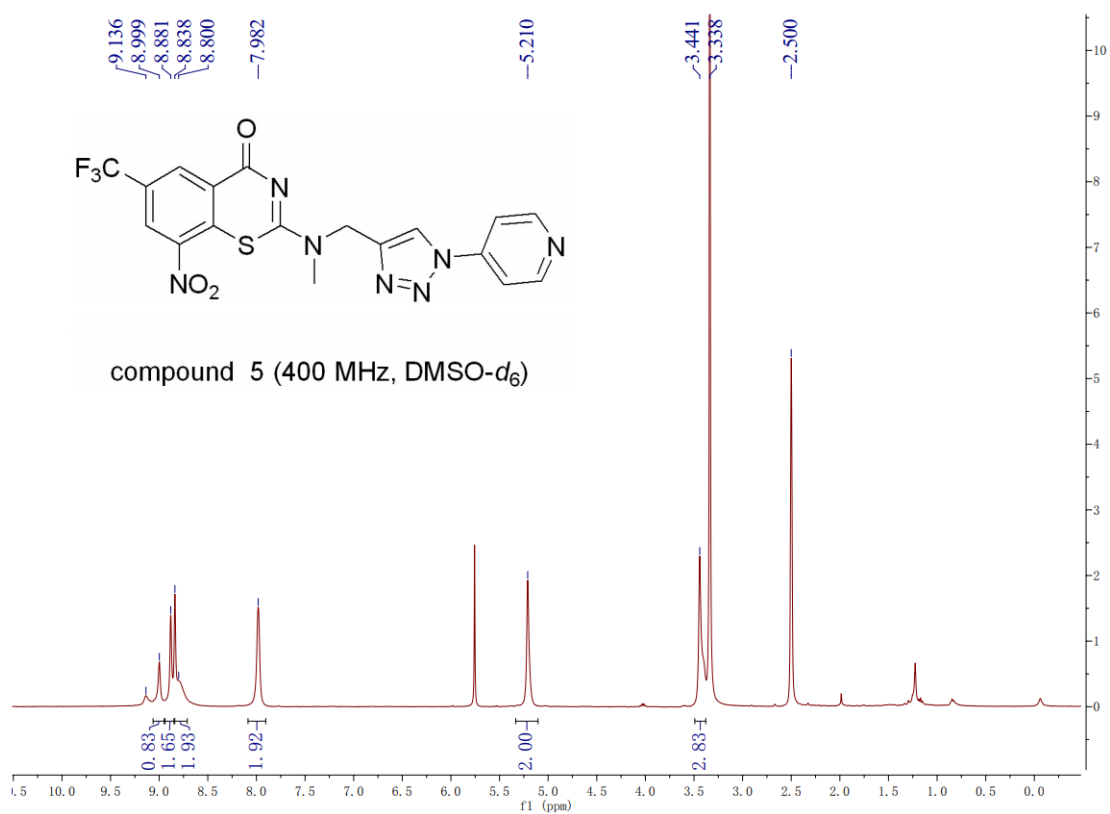

### <sup>13</sup>C NMR of Compound 5

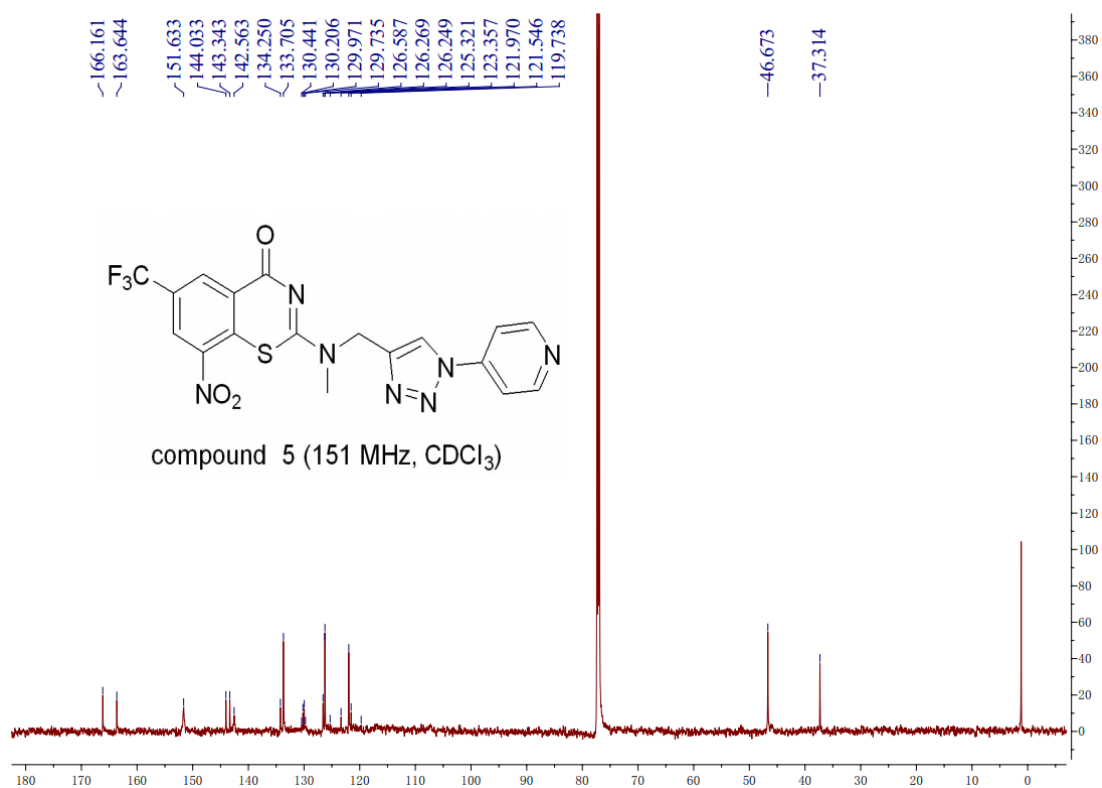

<sup>1</sup>H NMR of Compound 6

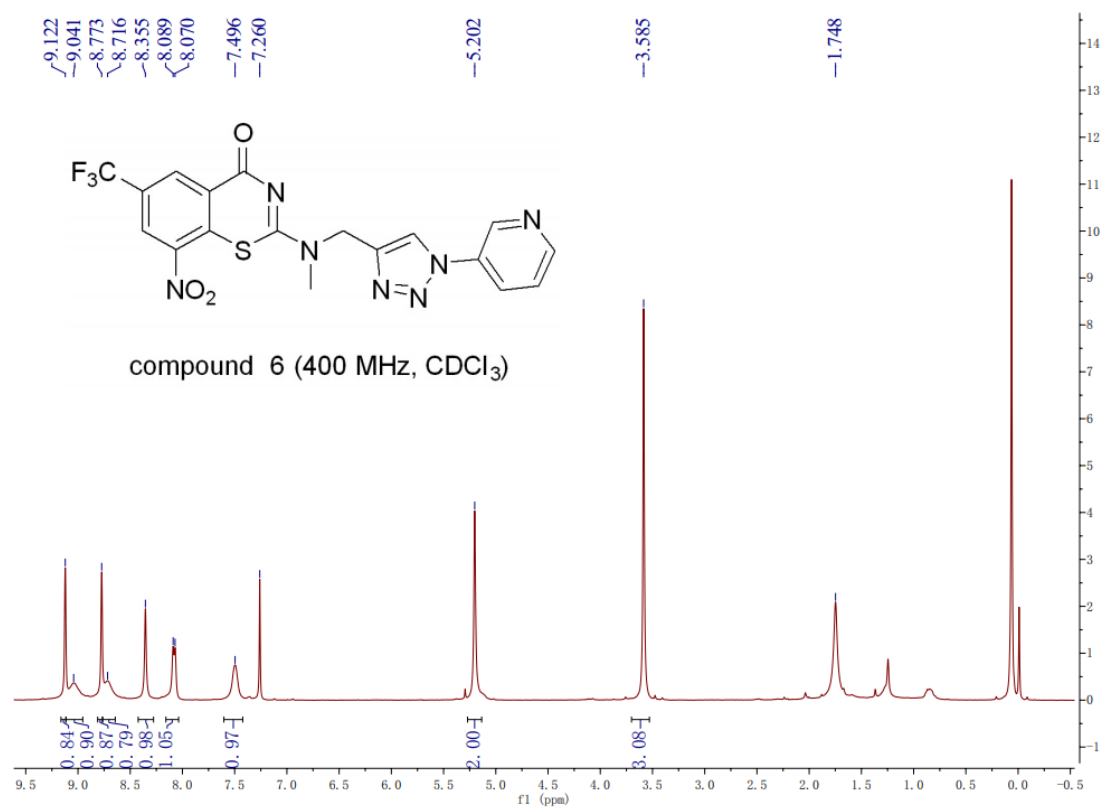

<sup>13</sup>C NMR of Compound 6

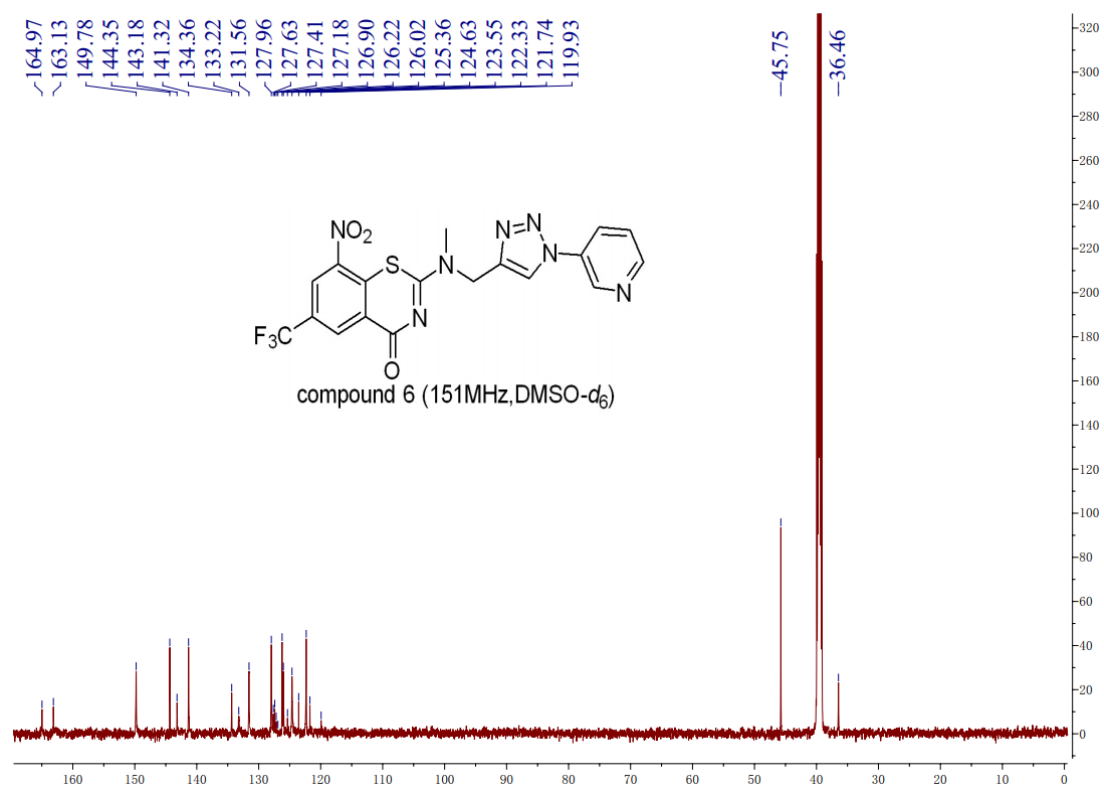

# <sup>1</sup>H NMR of Compound 7

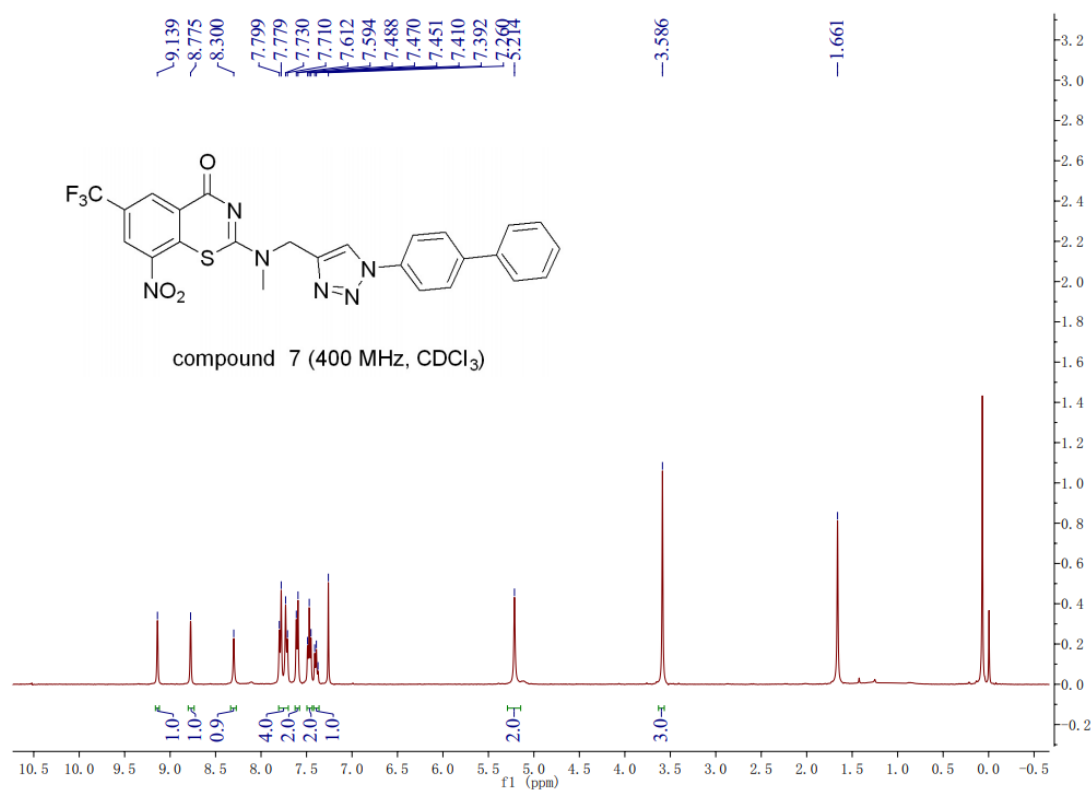

# <sup>13</sup>C NMR of Compound 7

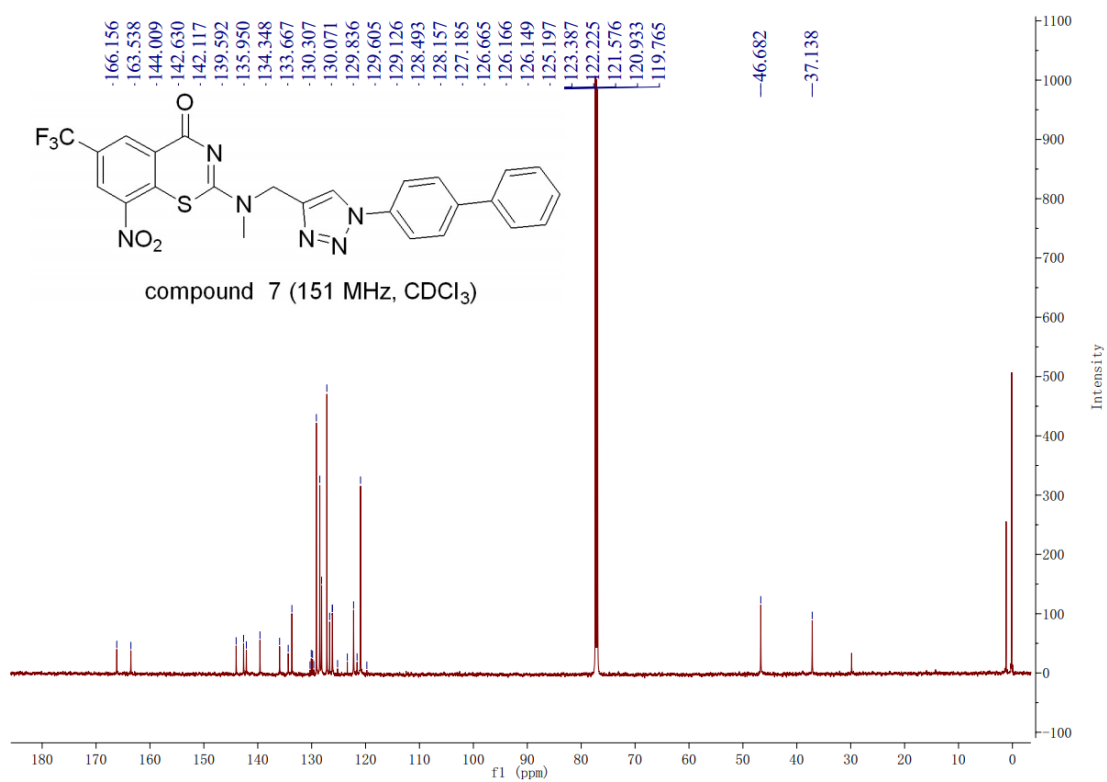

<sup>1</sup>H NMR of Compound 8

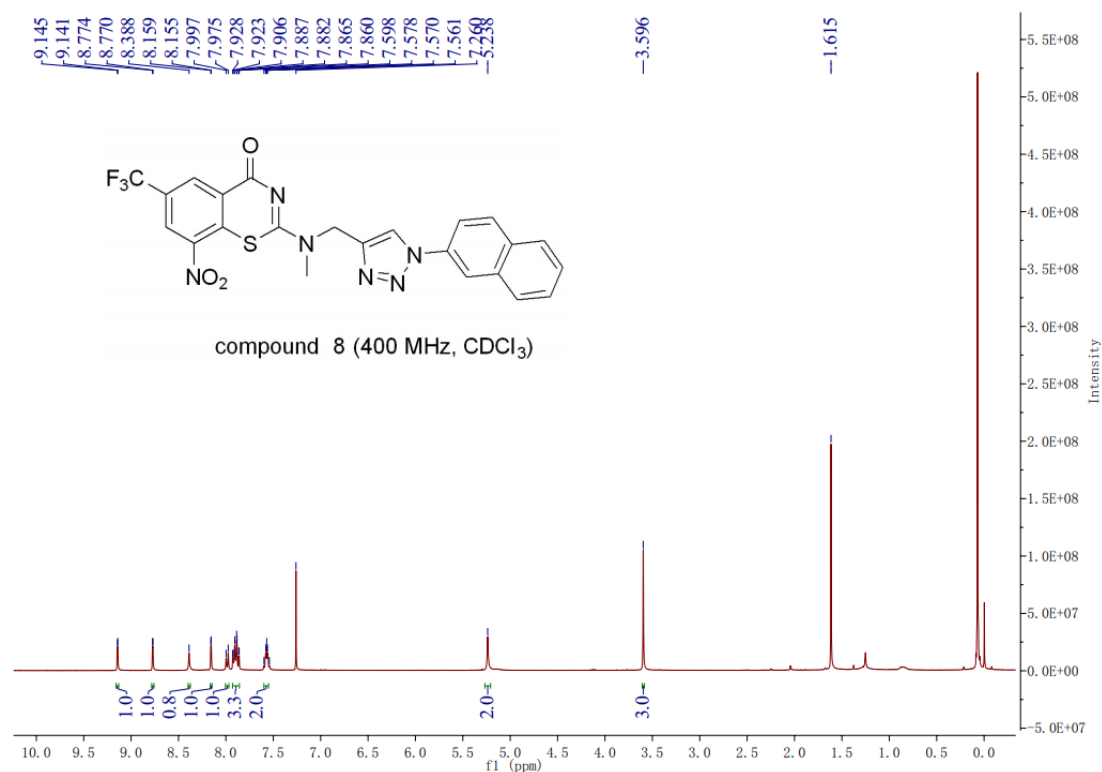

<sup>13</sup>C NMR of Compound 8

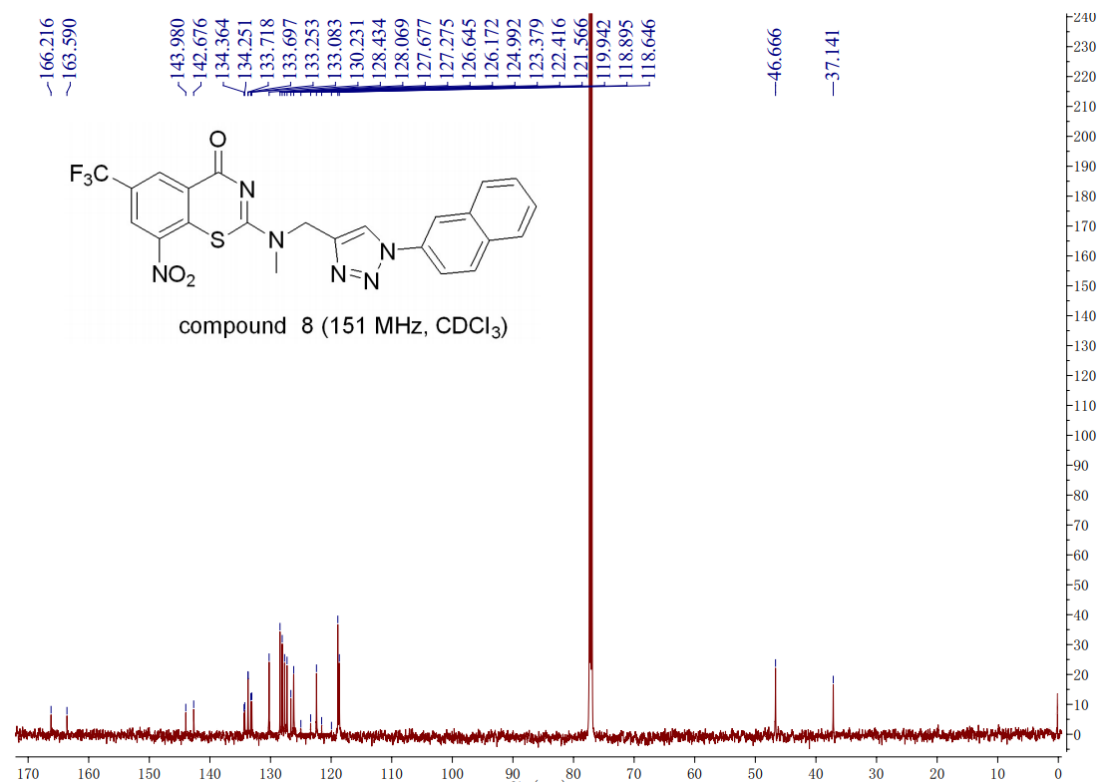

<sup>1</sup>H NMR of Compound 9

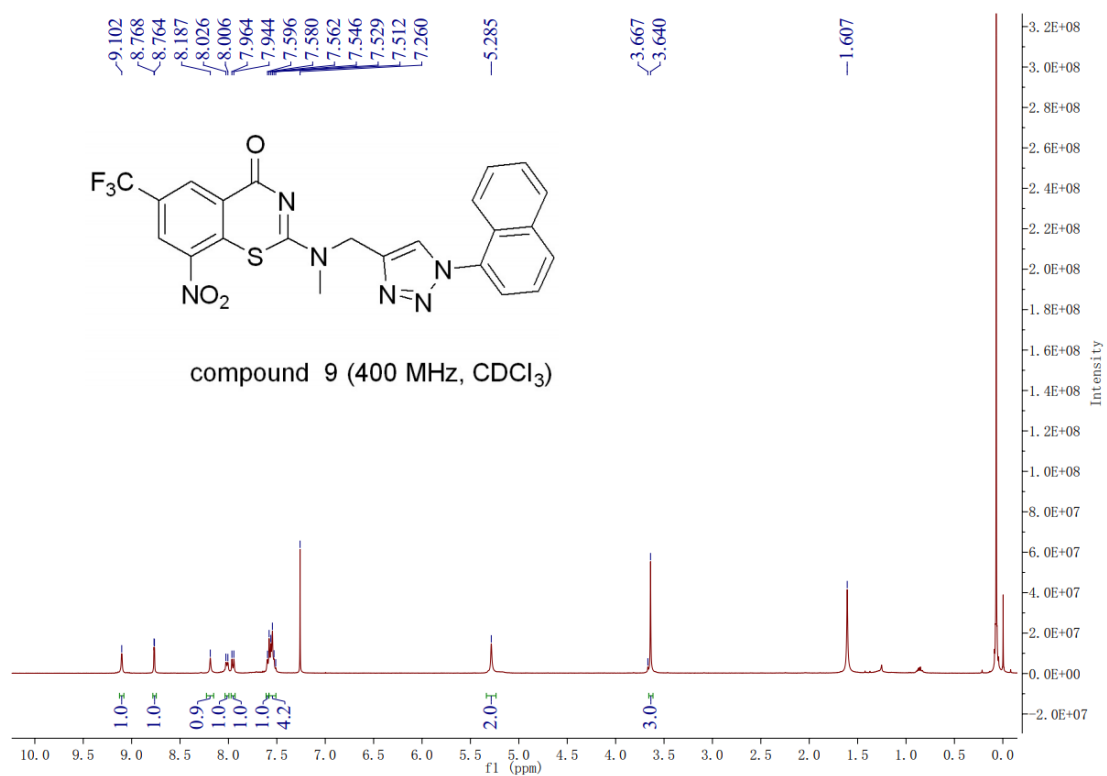

<sup>13</sup>C NMR of Compound 9

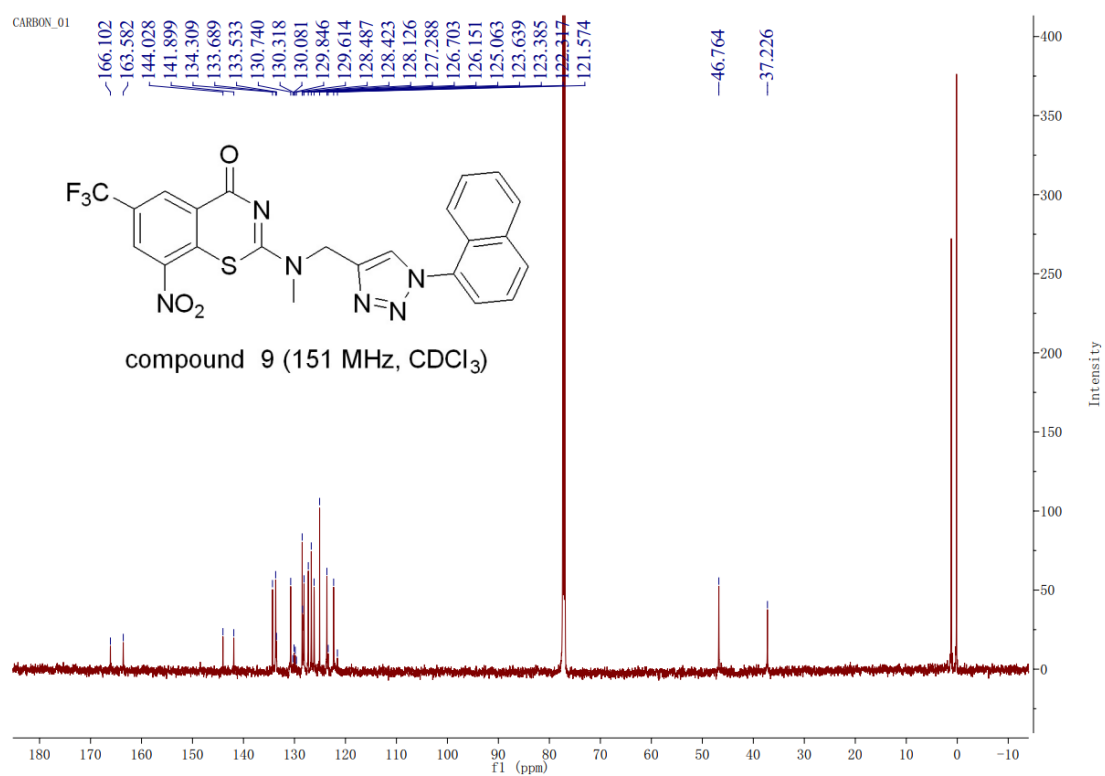

<sup>1</sup>H NMR of Compound 10

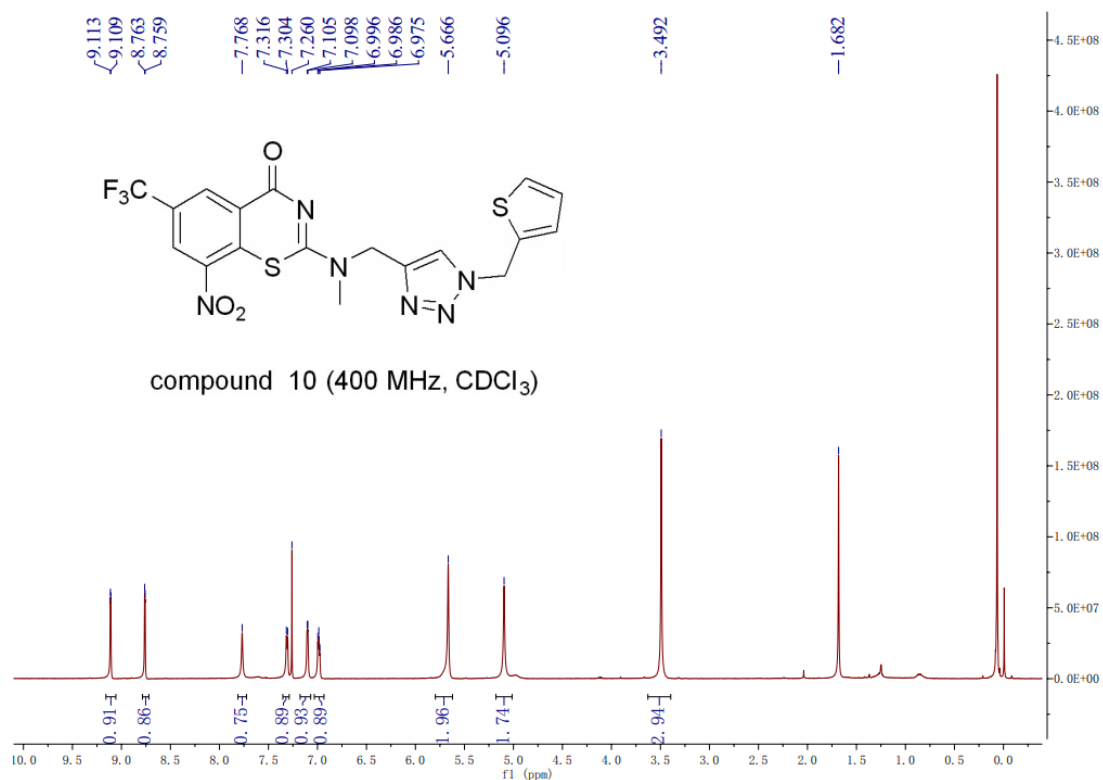

<sup>13</sup>C NMR of Compound 10

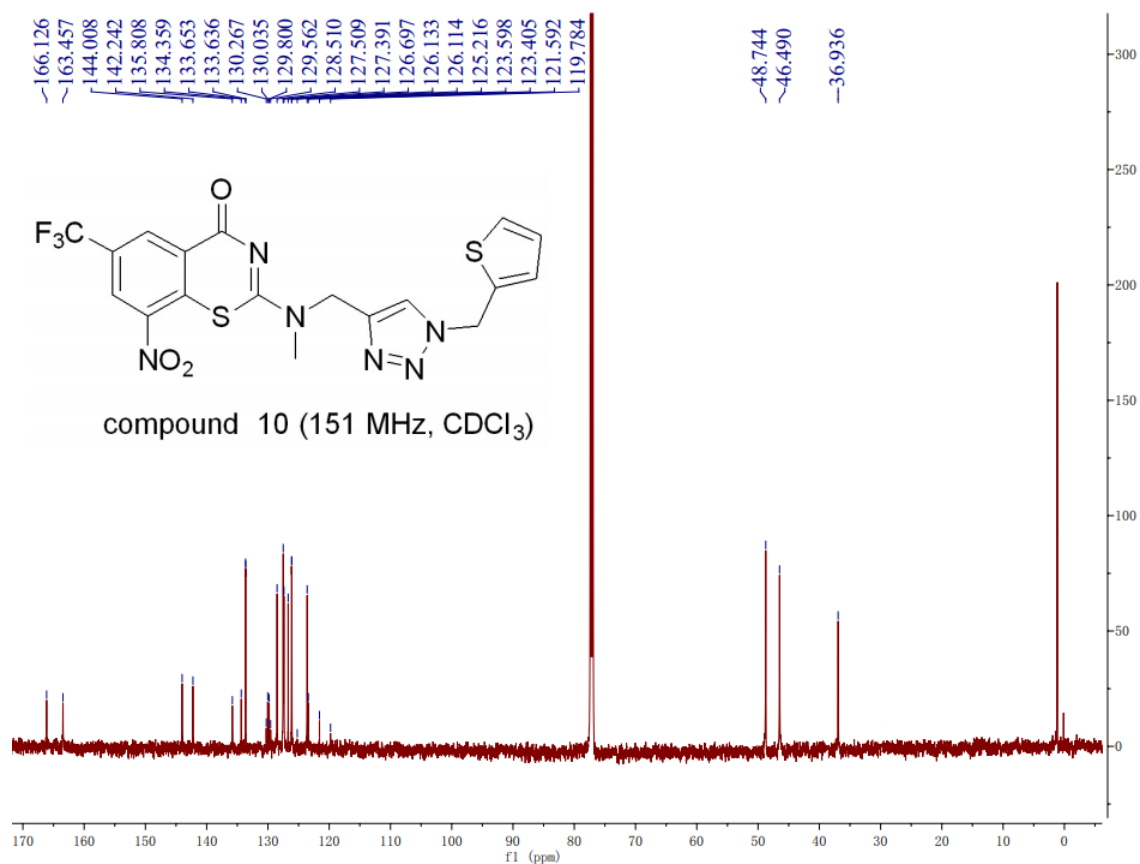

<sup>1</sup>H NMR of Compound 11

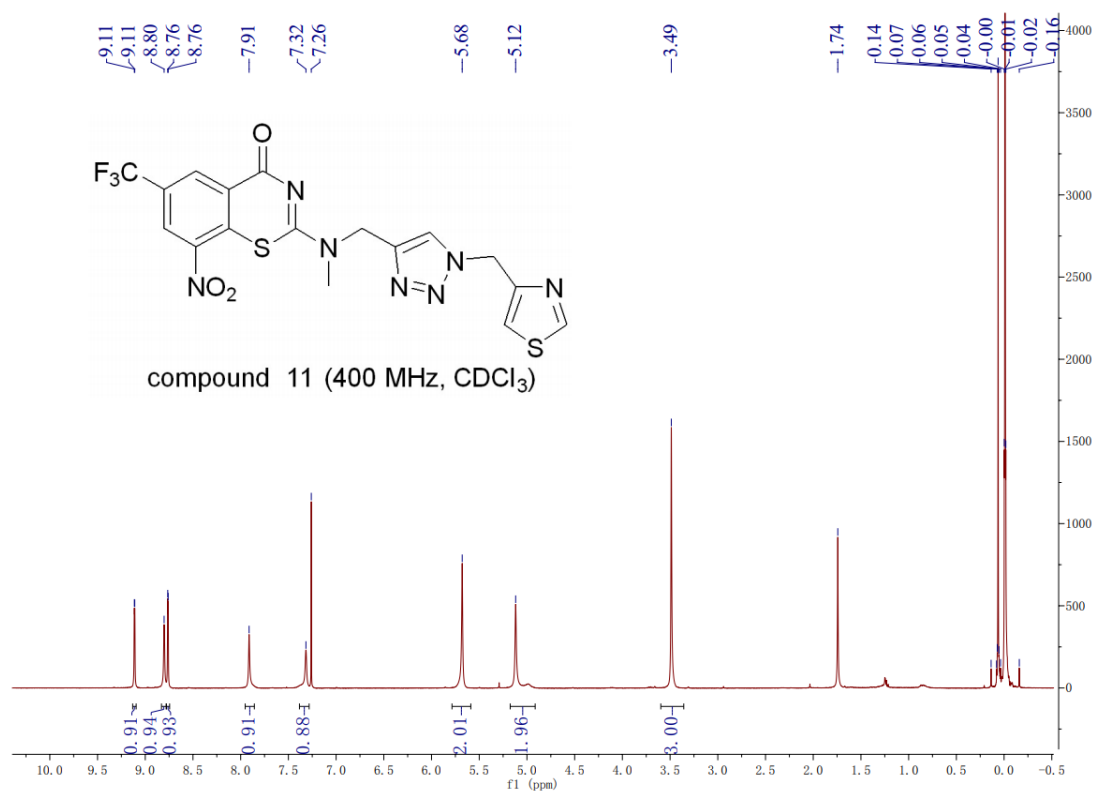

<sup>13</sup>C NMR of Compound 11

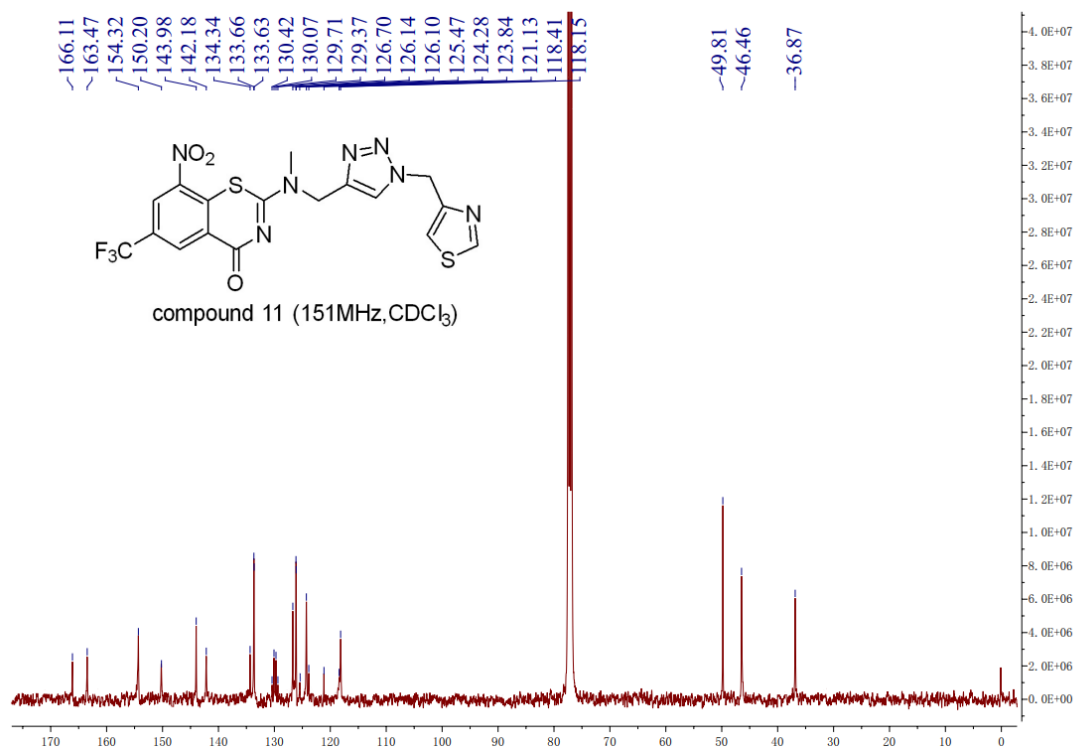

<sup>1</sup>H NMR of Compound 12

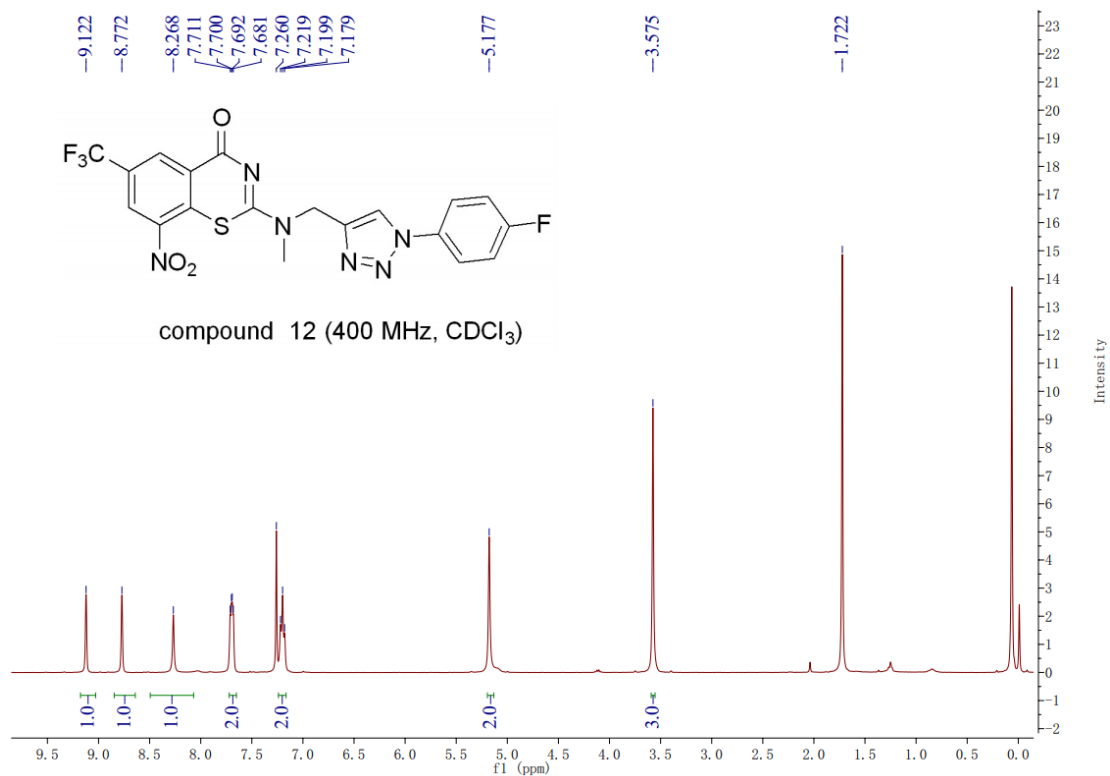

<sup>13</sup>C NMR of Compound 12

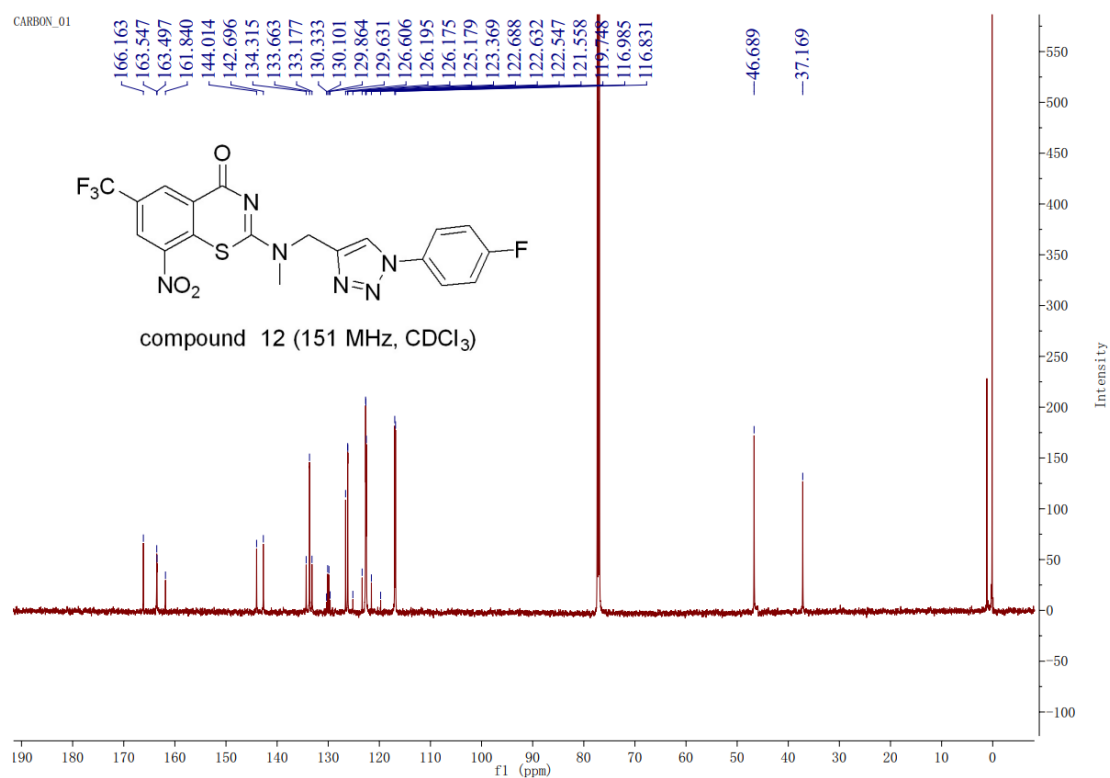

<sup>1</sup>H NMR of Compound 13

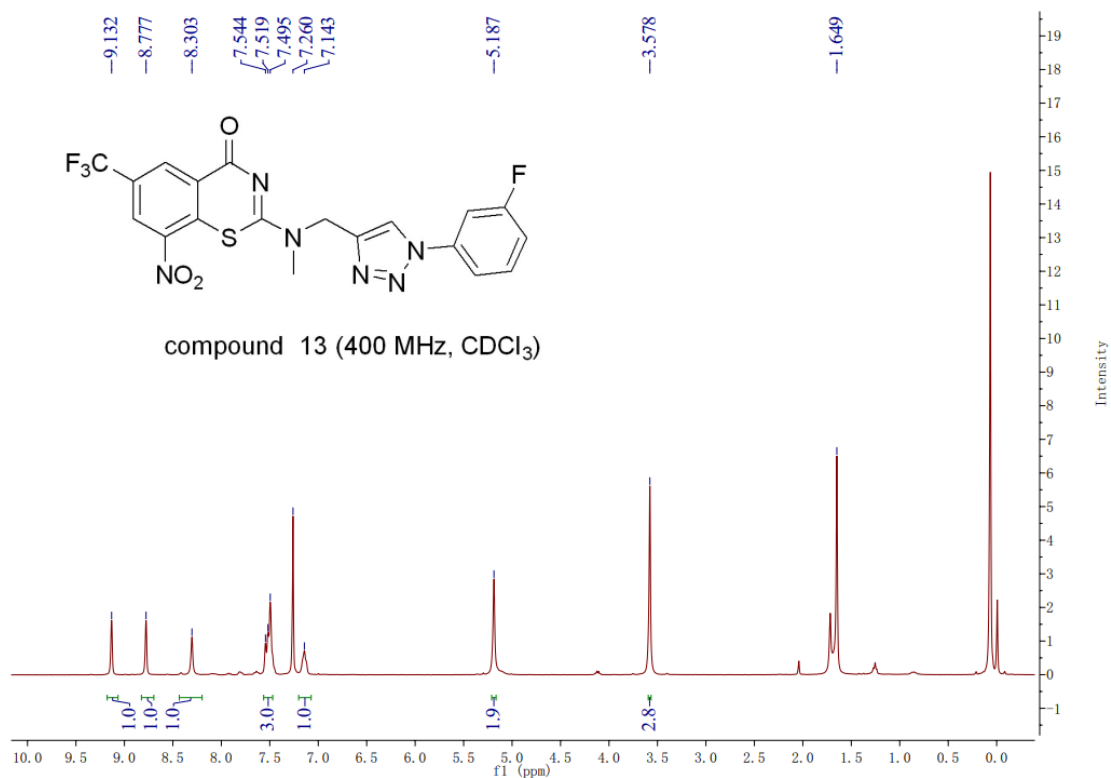

<sup>13</sup>C NMR of Compound 13

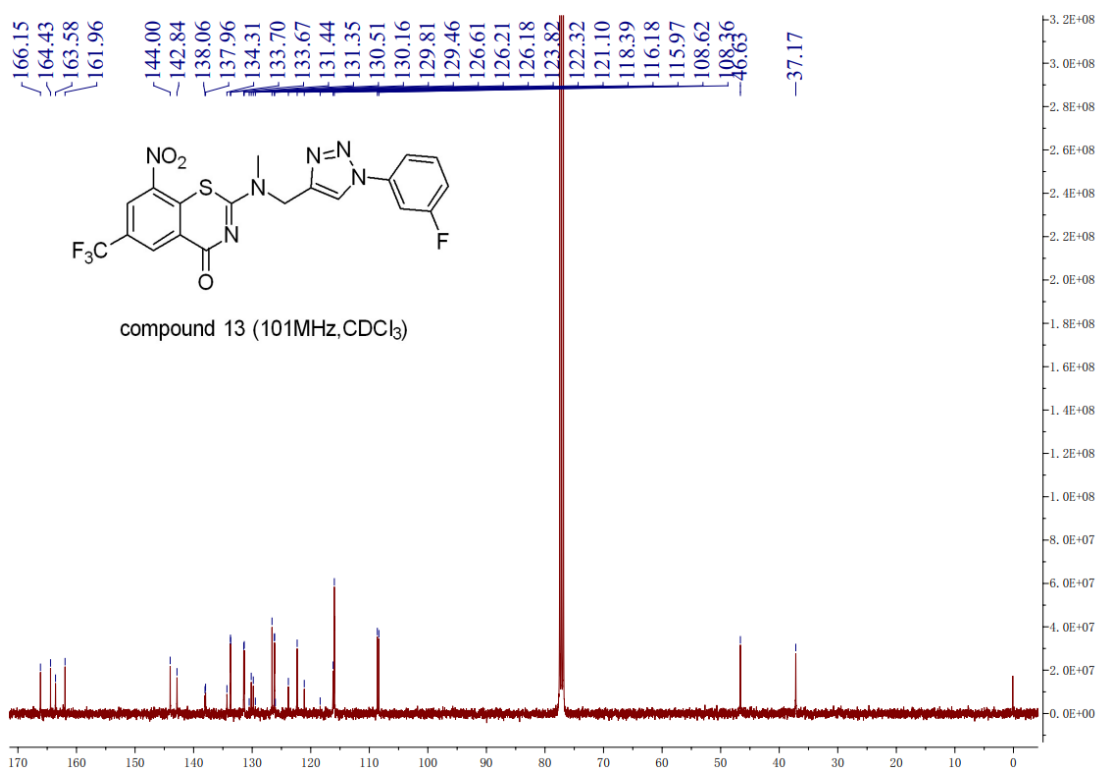

<sup>1</sup>H NMR of Compound 14

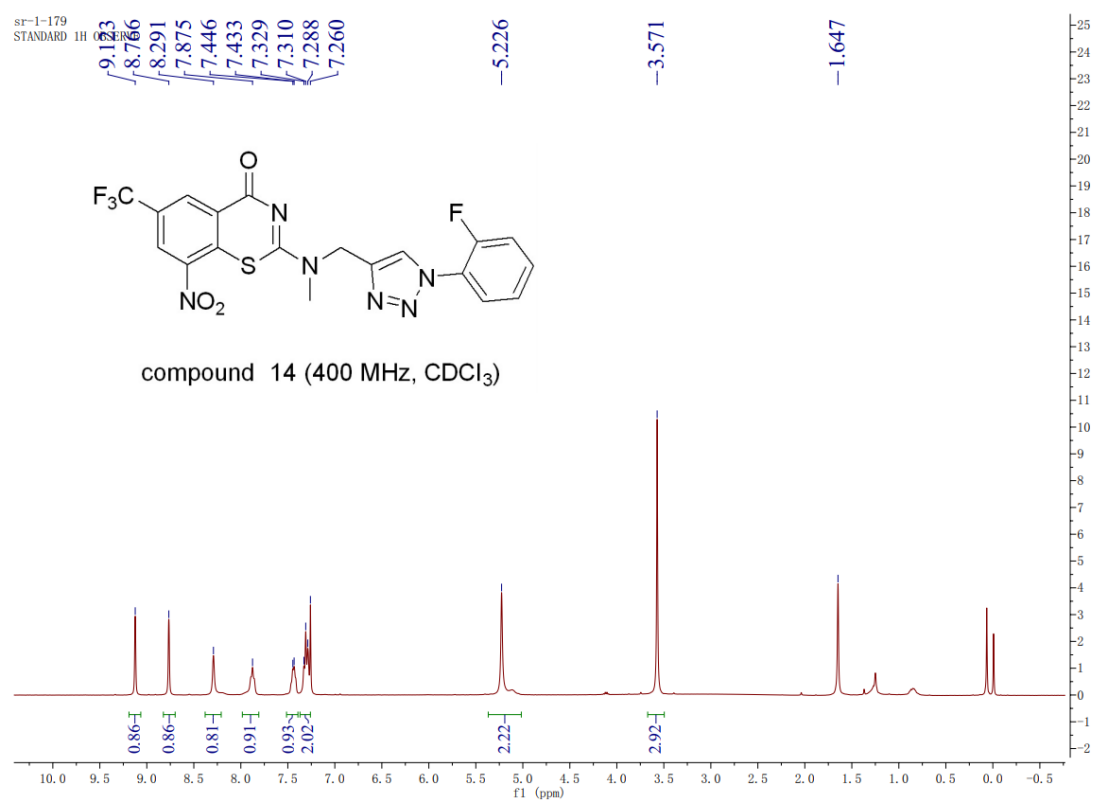

<sup>13</sup>C NMR of Compound 14

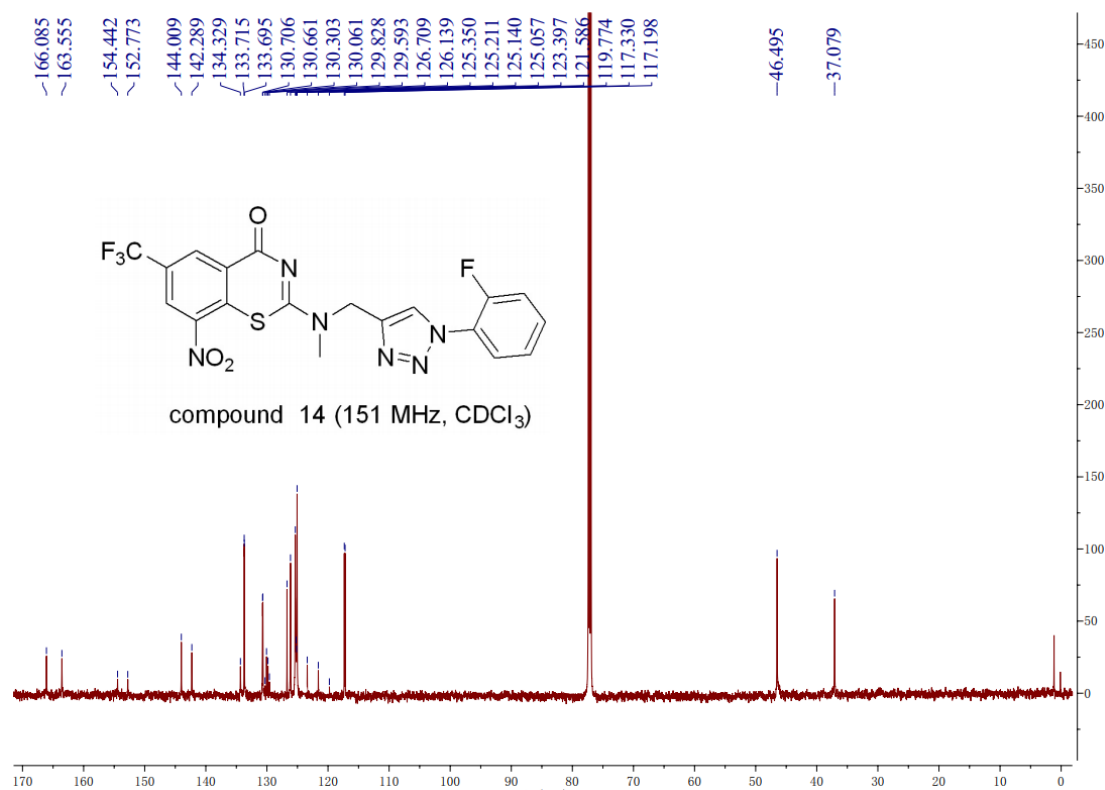

<sup>1</sup>H NMR of Compound 15

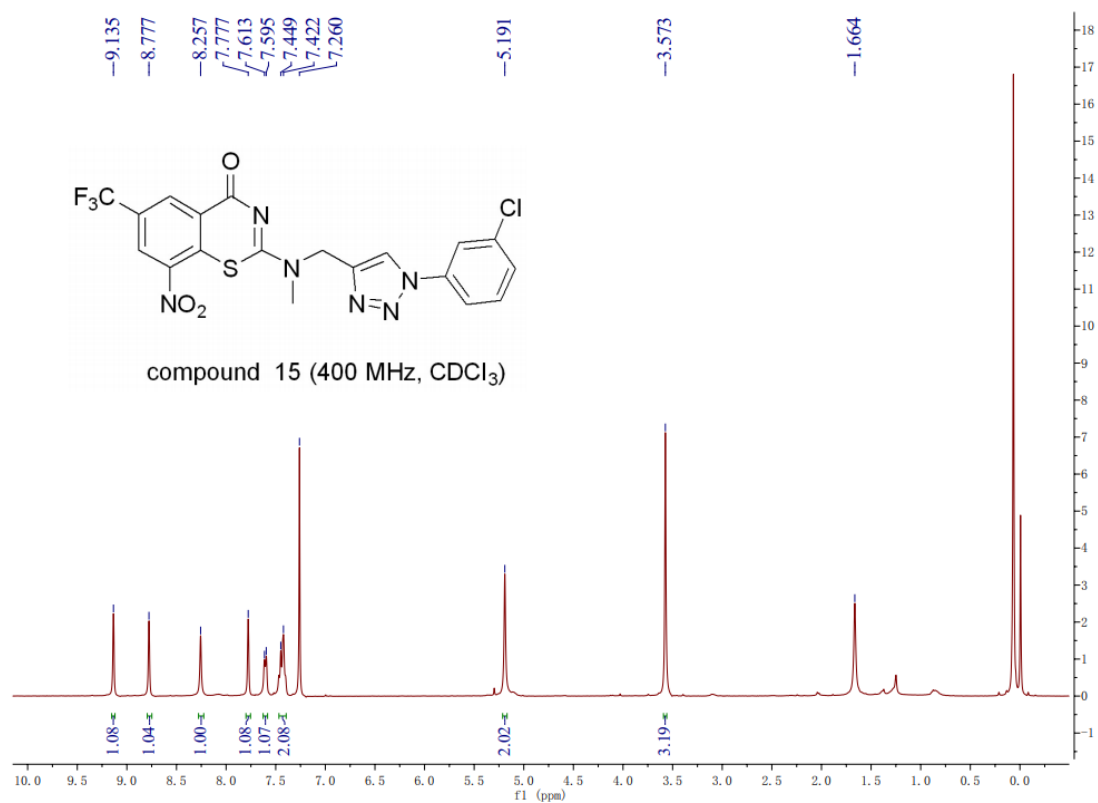

<sup>13</sup>C NMR of Compound 15

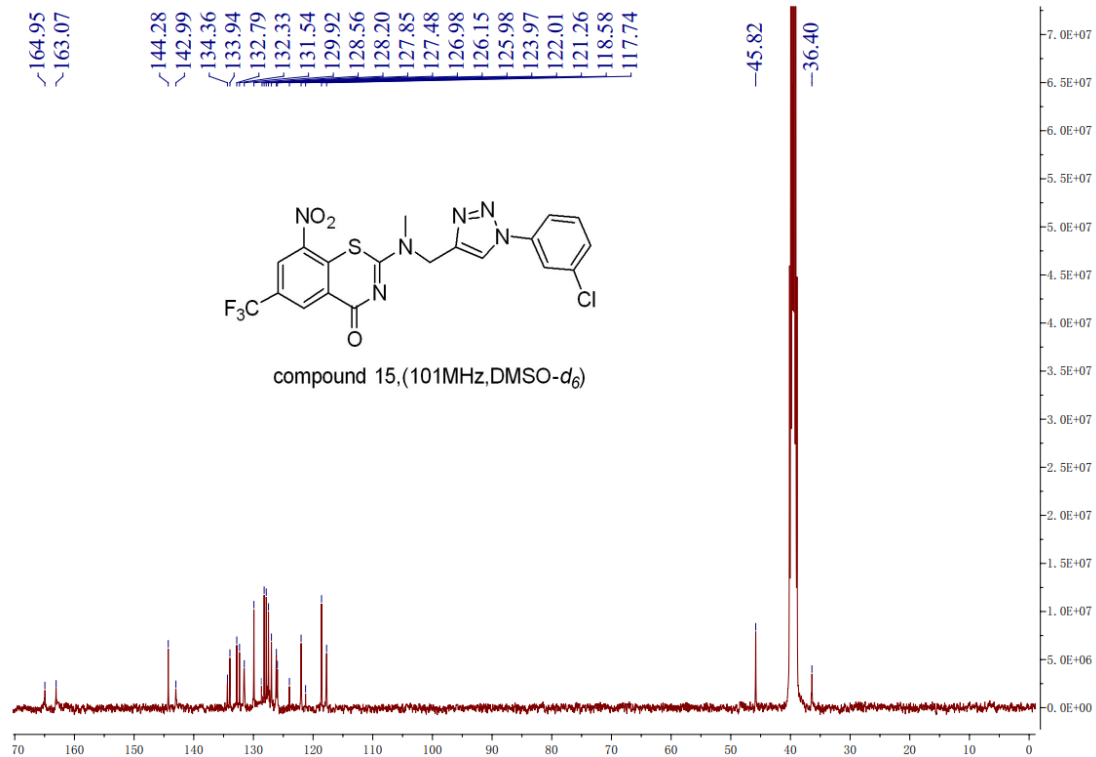

<sup>1</sup>H NMR of Compound 16

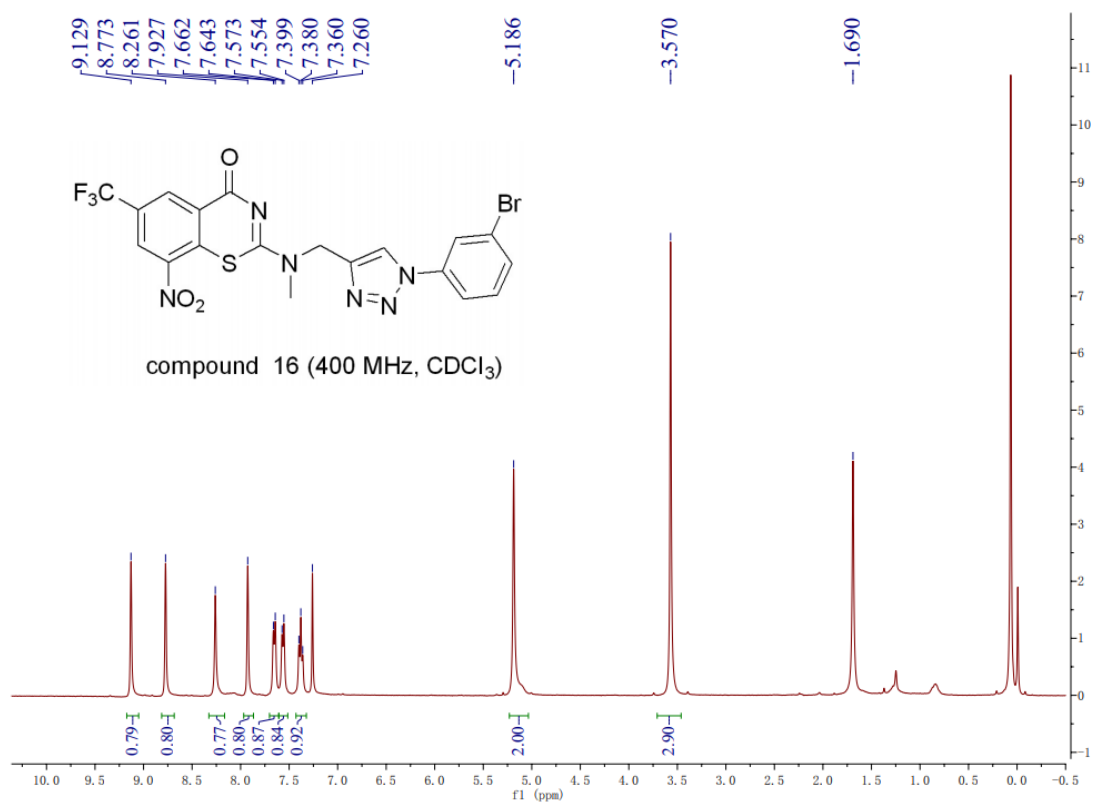

<sup>13</sup>C NMR of Compound 16

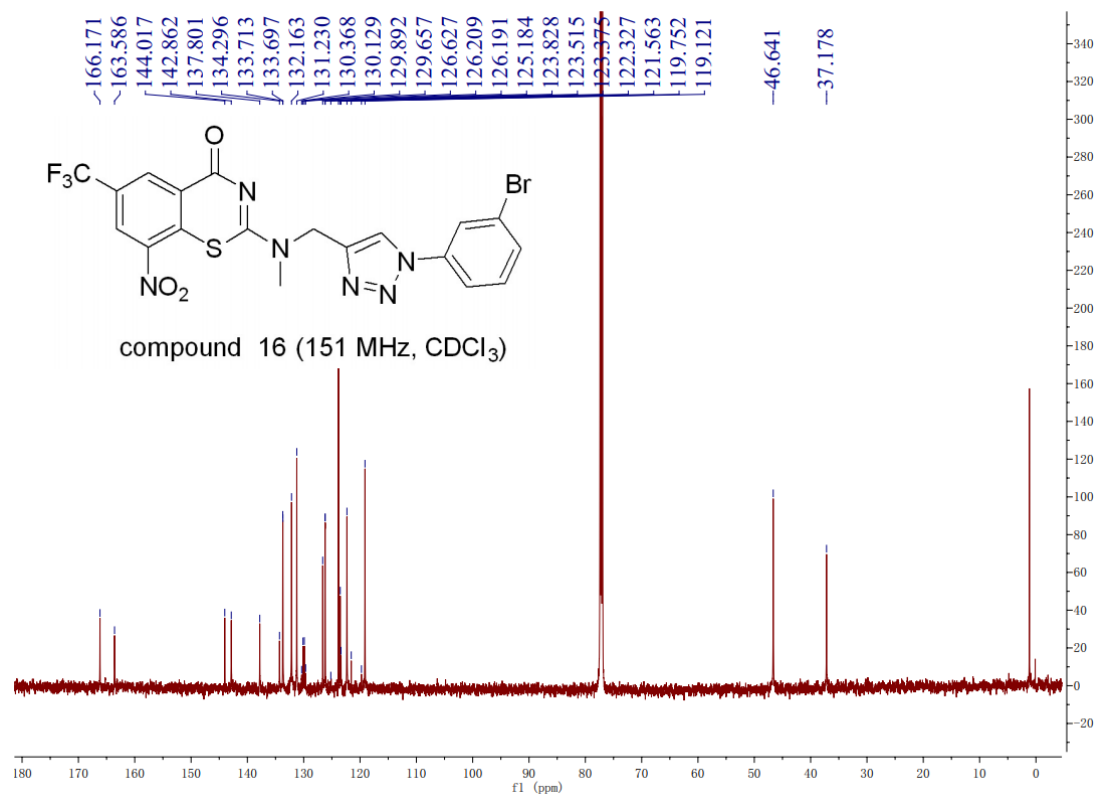

<sup>1</sup>H NMR of Compound 17

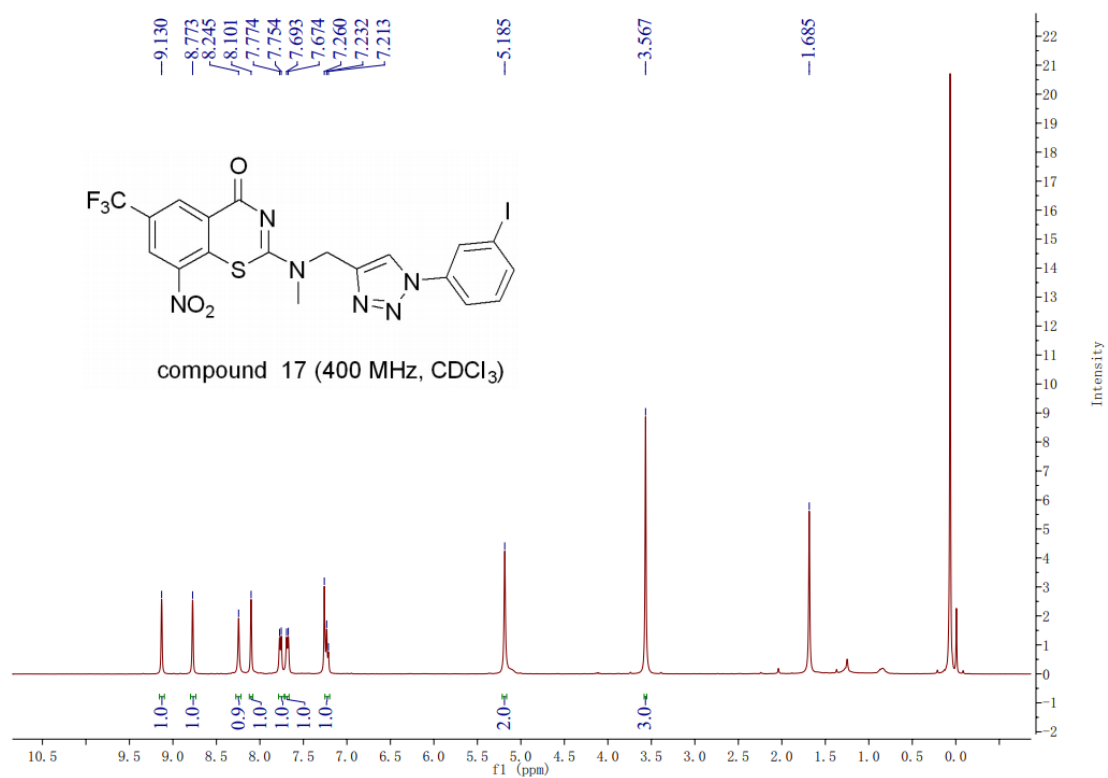

<sup>13</sup>C NMR of Compound 17

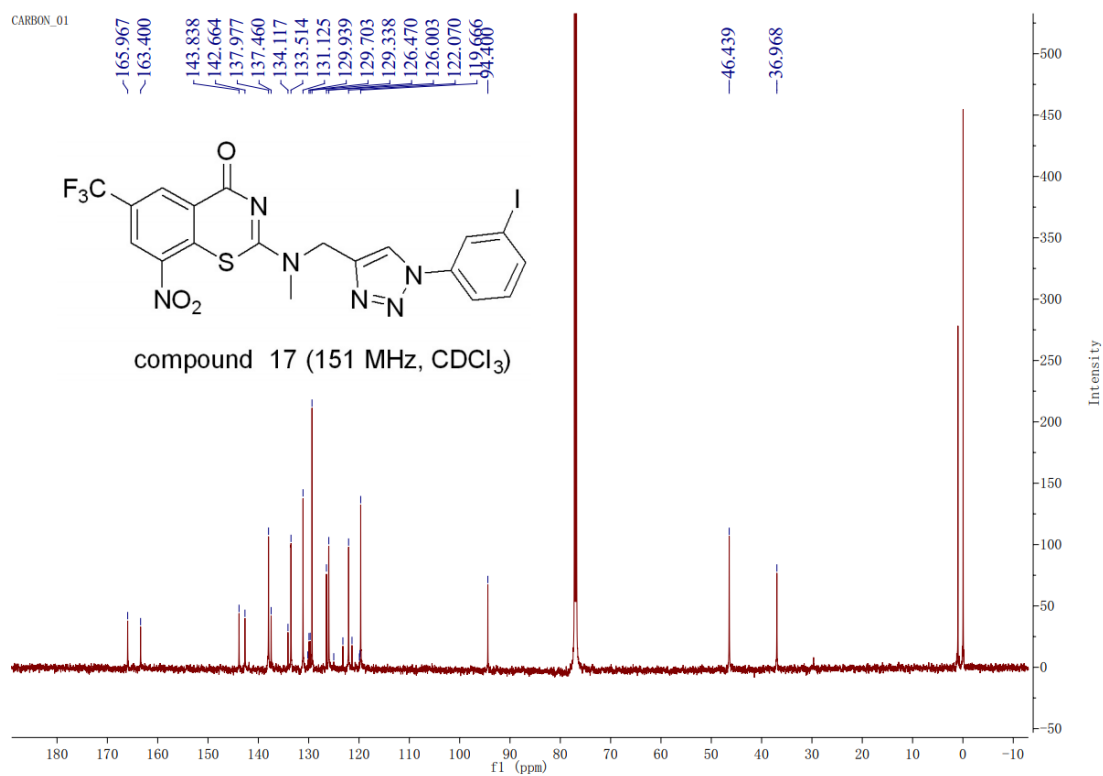

<sup>1</sup>H NMR of Compound 18

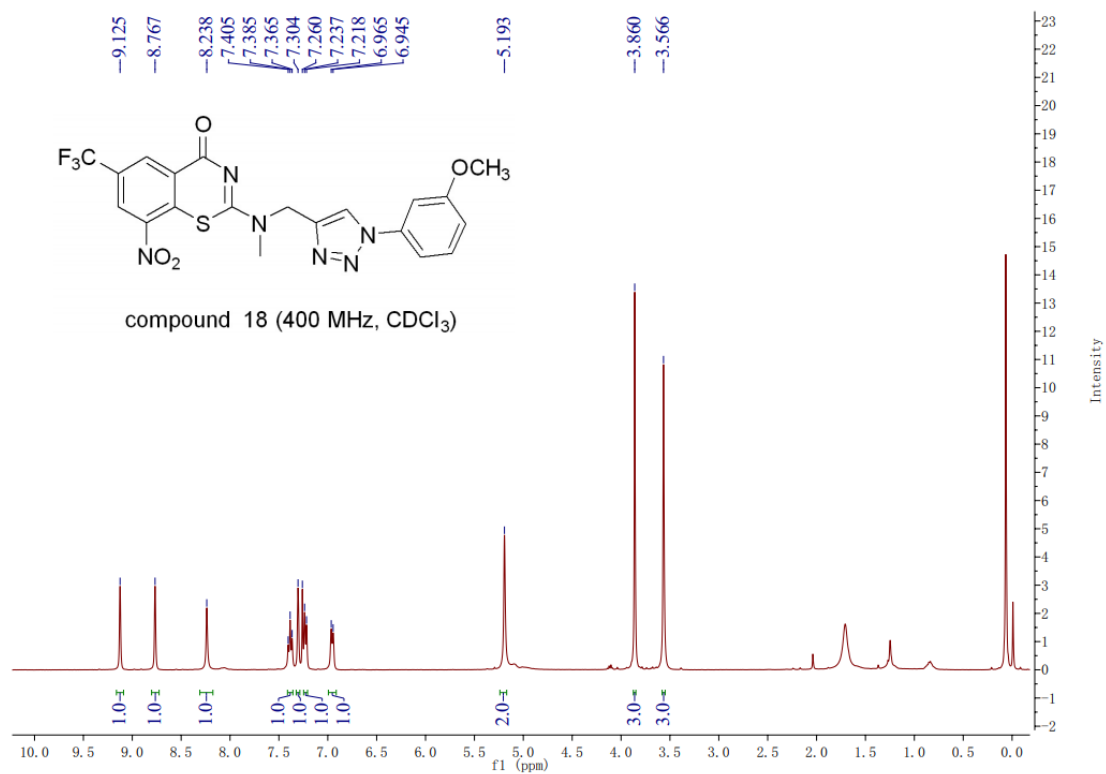

<sup>13</sup>C NMR of Compound 18

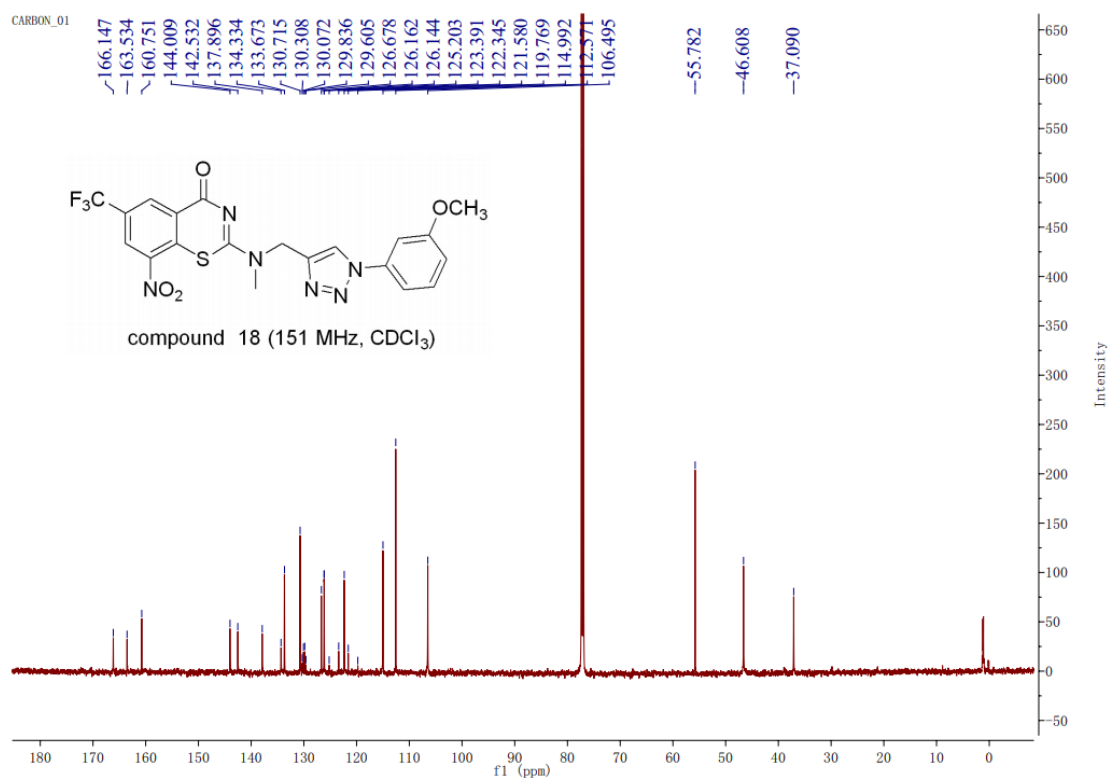

<sup>1</sup>H NMR of Compound 19

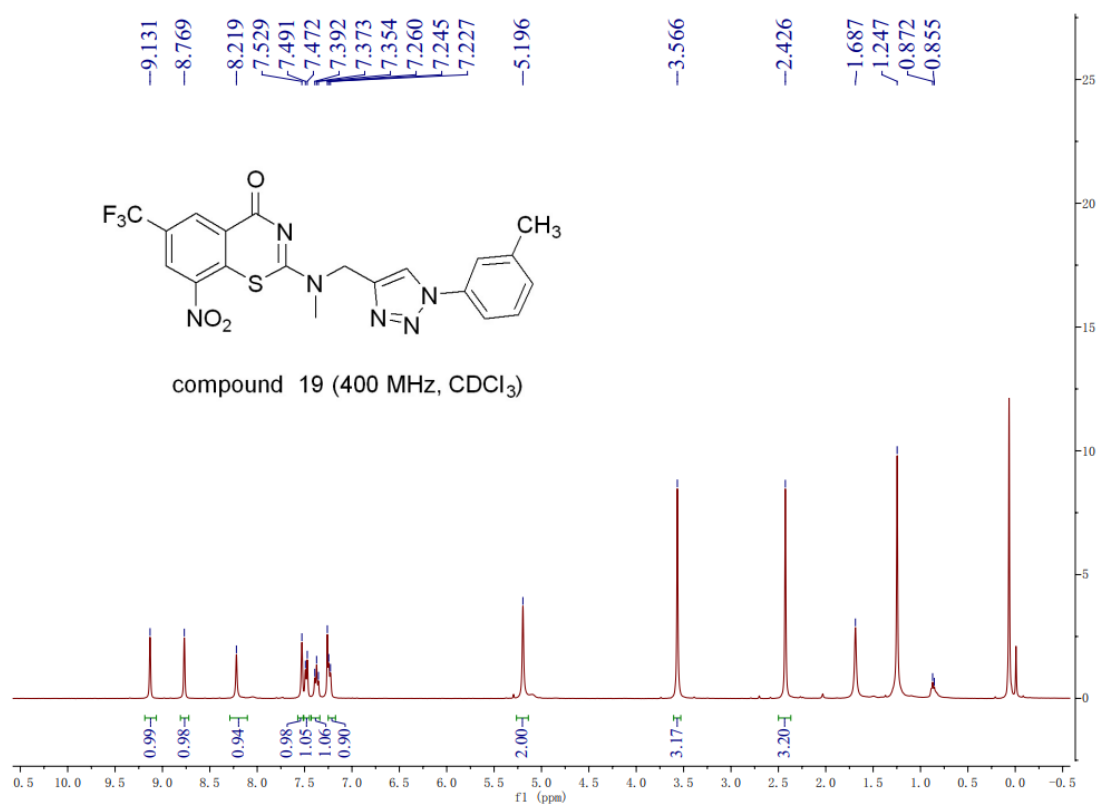

<sup>13</sup>C NMR of Compound 19

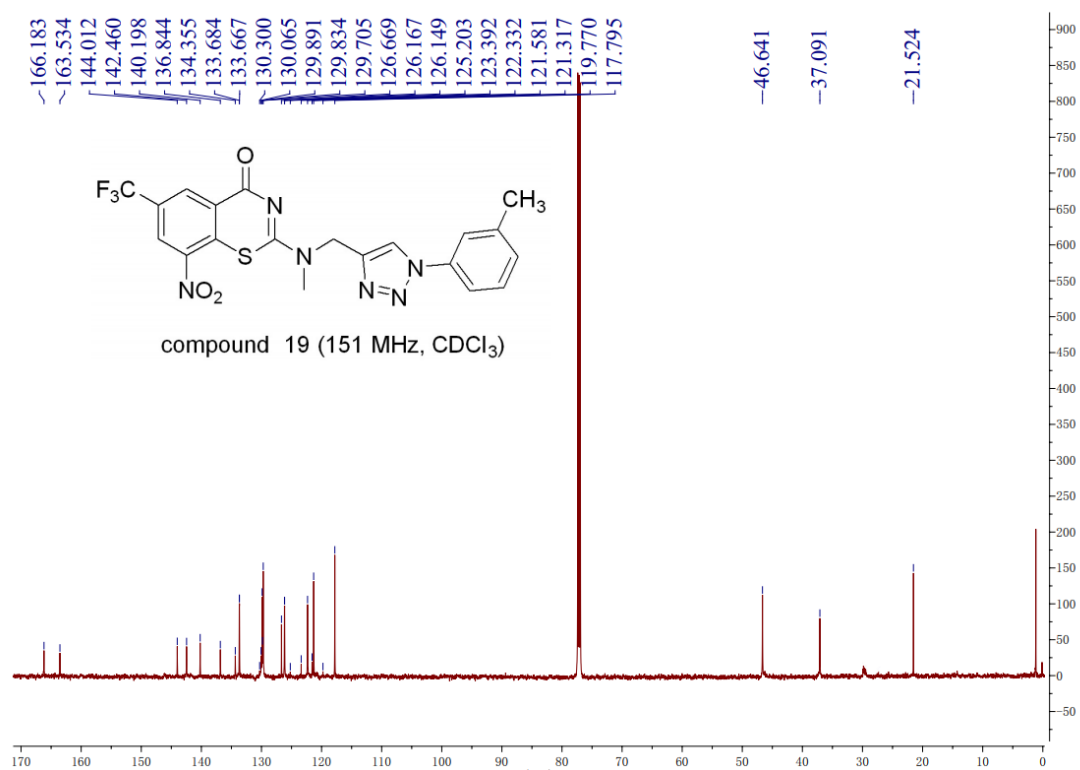

<sup>1</sup>H NMR of Compound 20

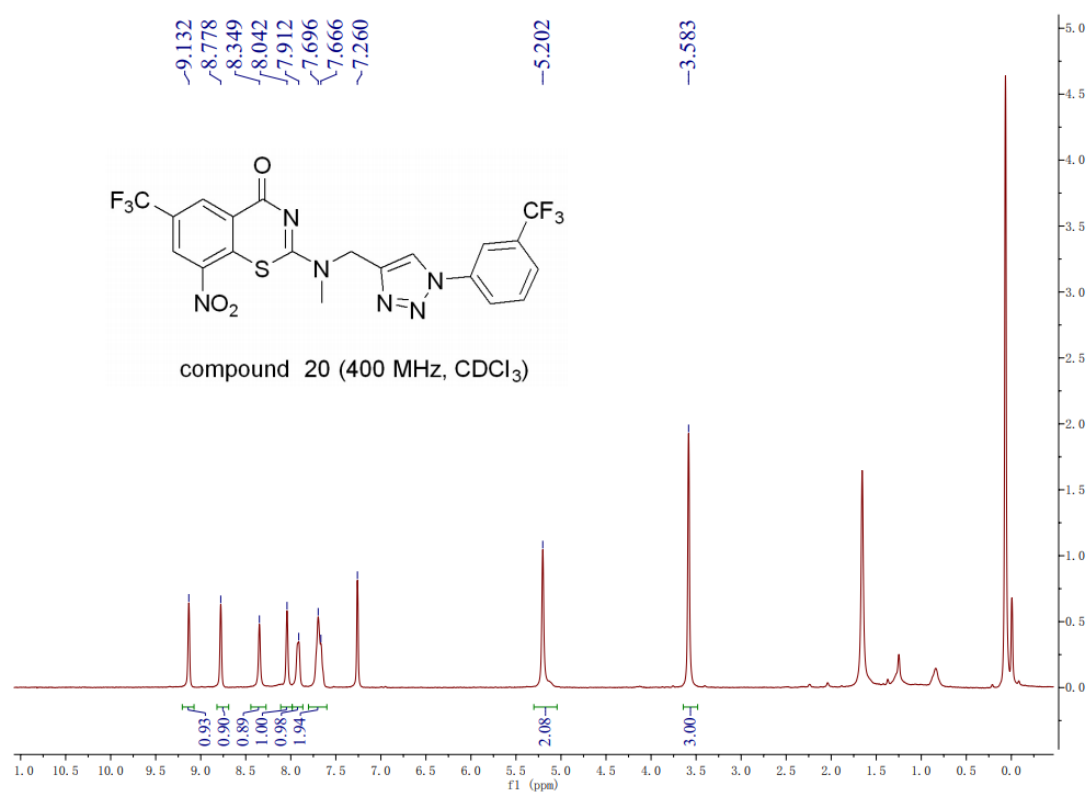

<sup>13</sup>C NMR of Compound 20

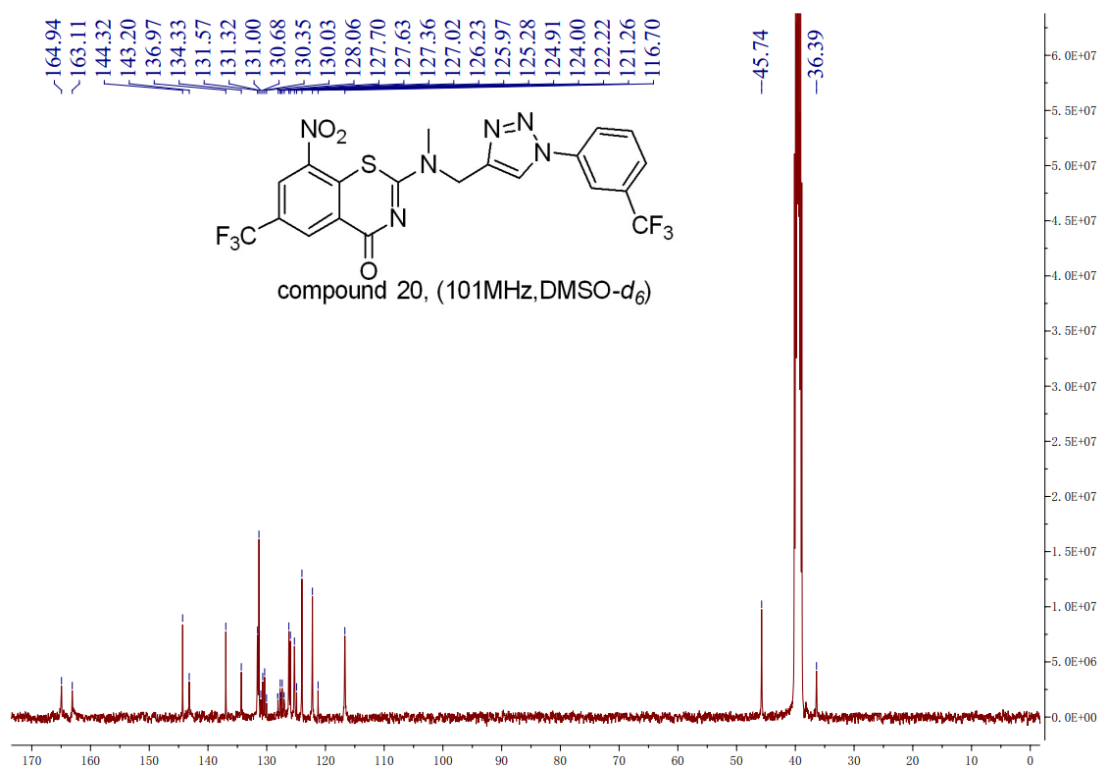

<sup>1</sup>H NMR of Compound 21

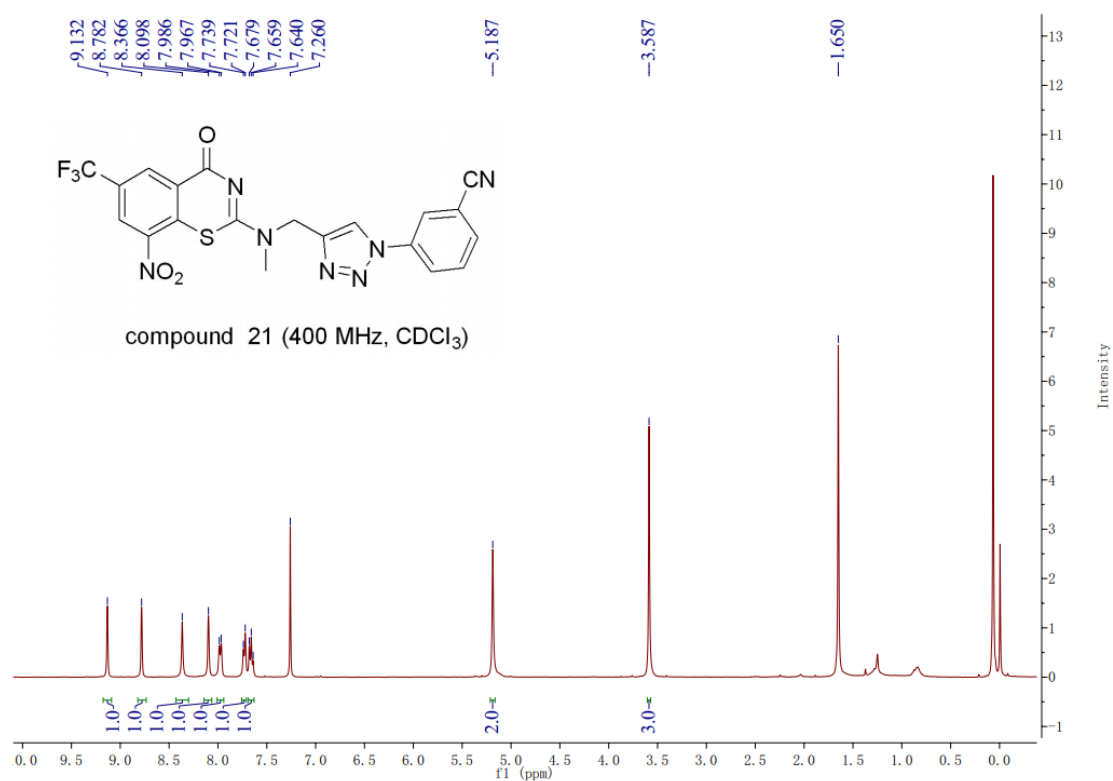

<sup>13</sup>C NMR of Compound 21

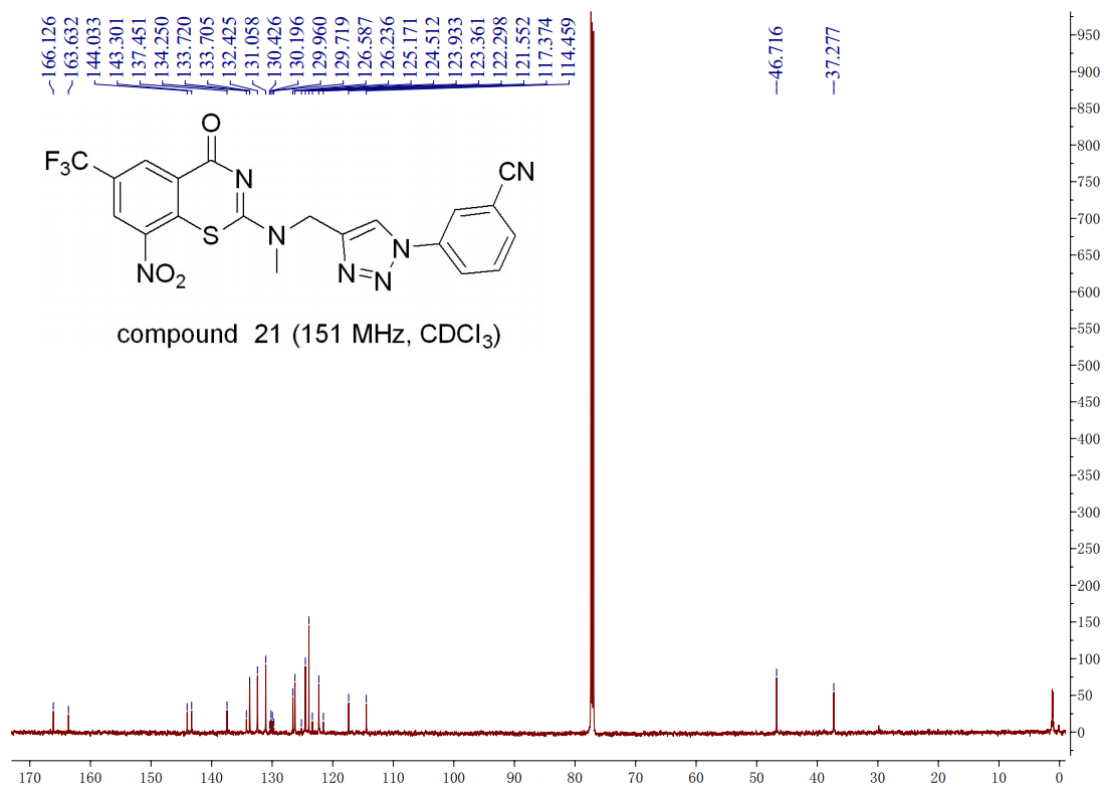

<sup>1</sup>H NMR of Compound 22

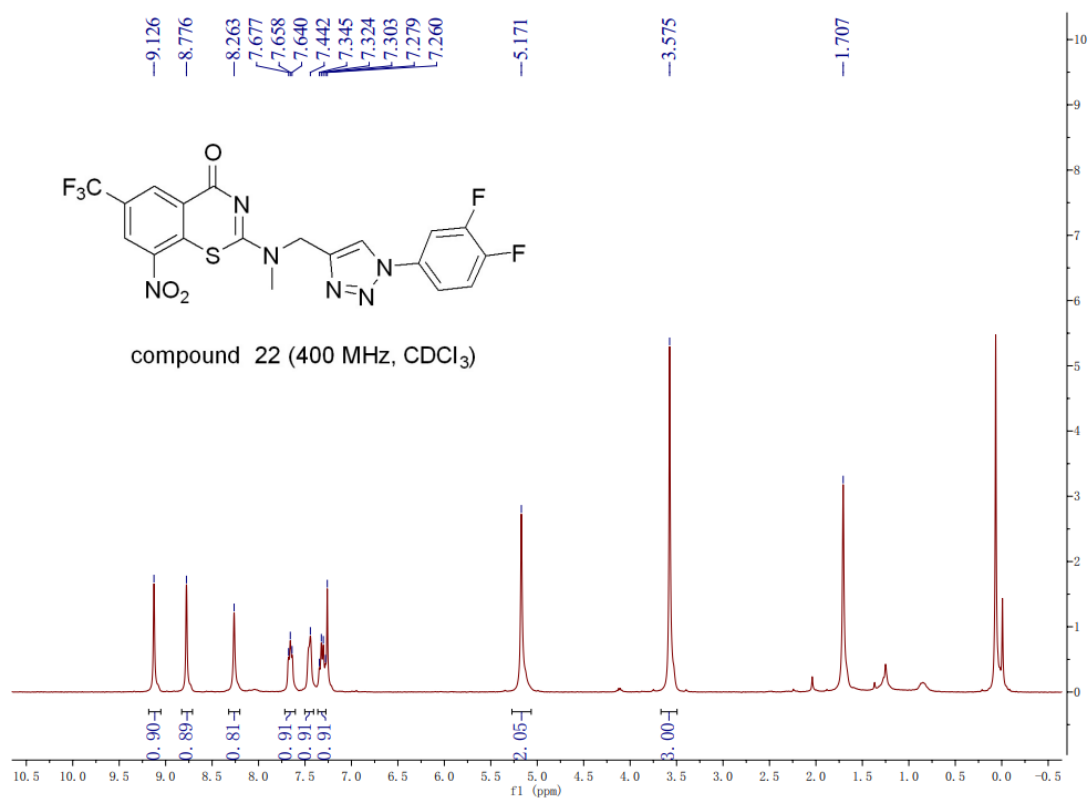

<sup>13</sup>C NMR of Compound 22

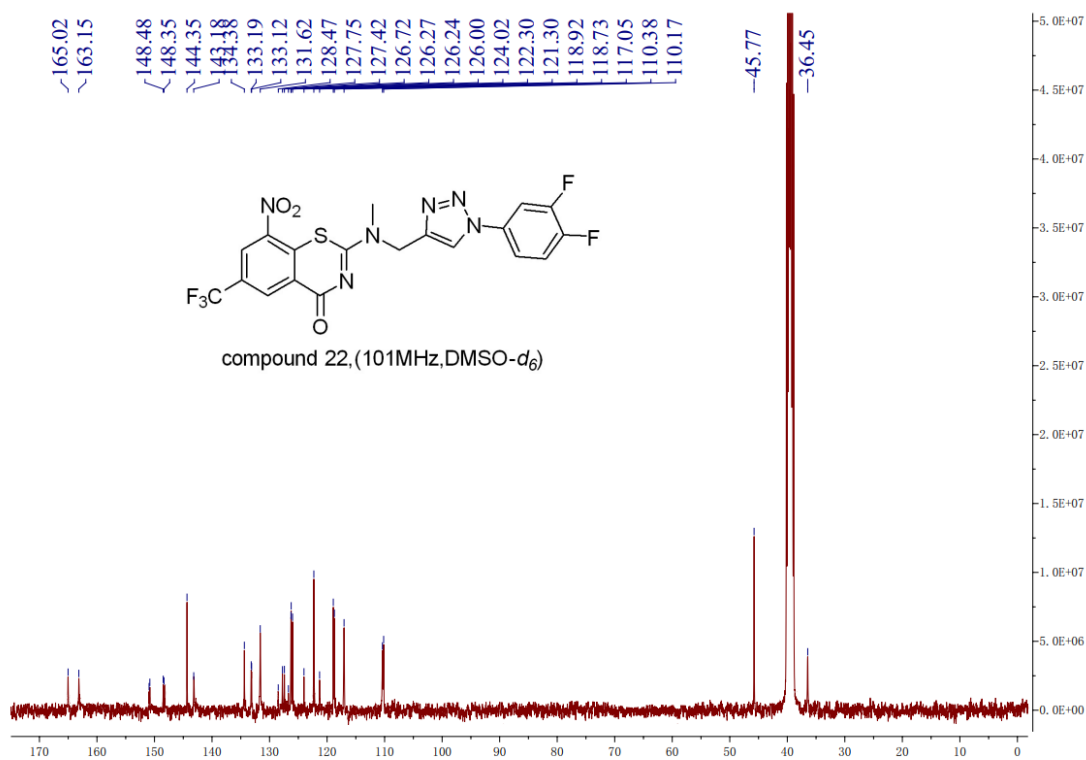

<sup>1</sup>H NMR of Compound 23

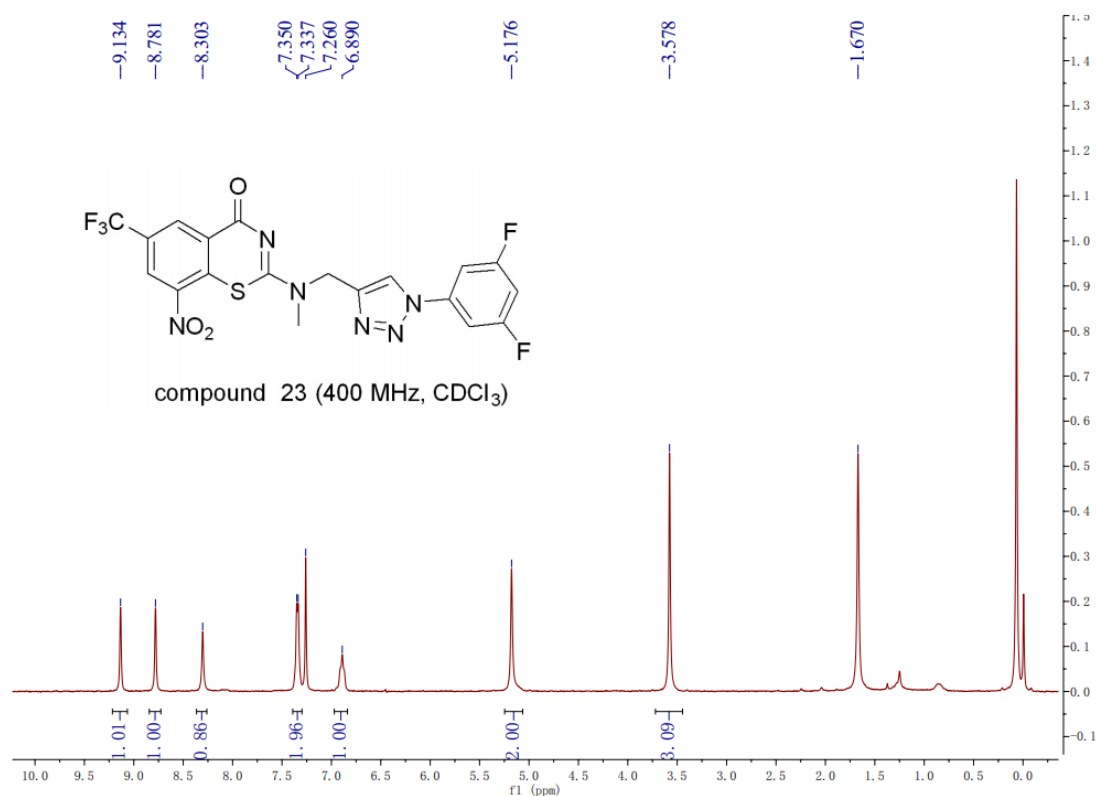

<sup>13</sup>C NMR of Compound 23

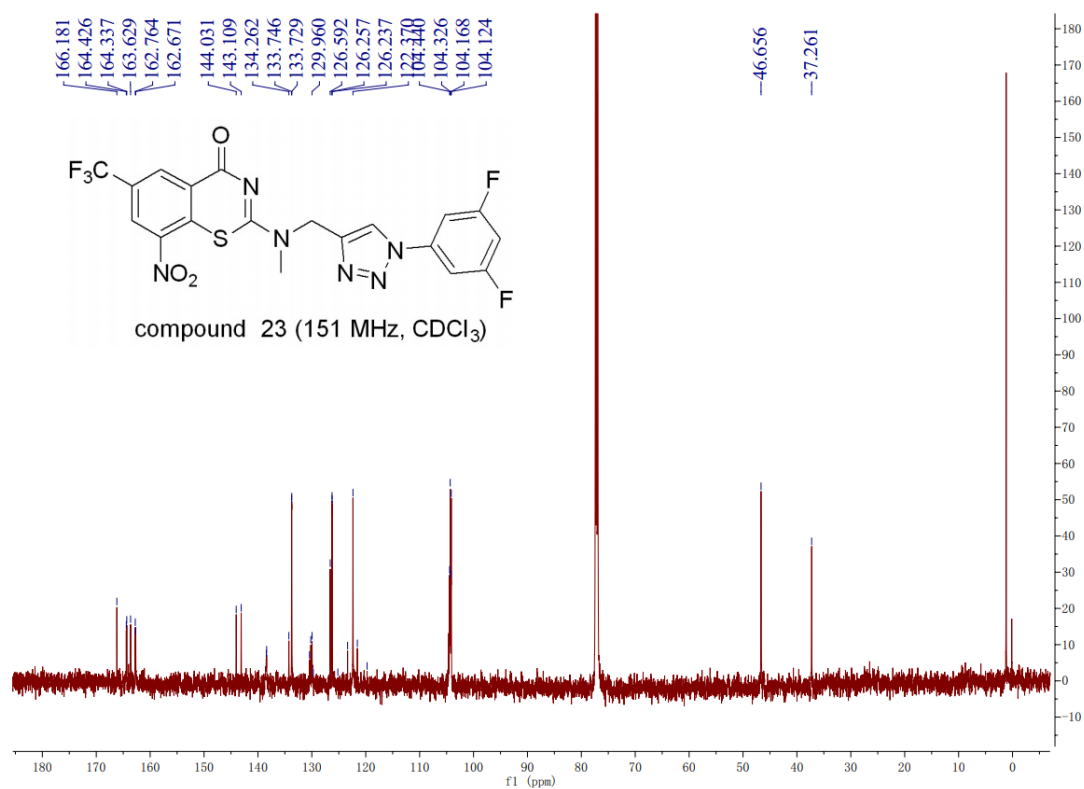

<sup>1</sup>H NMR of Compound 24

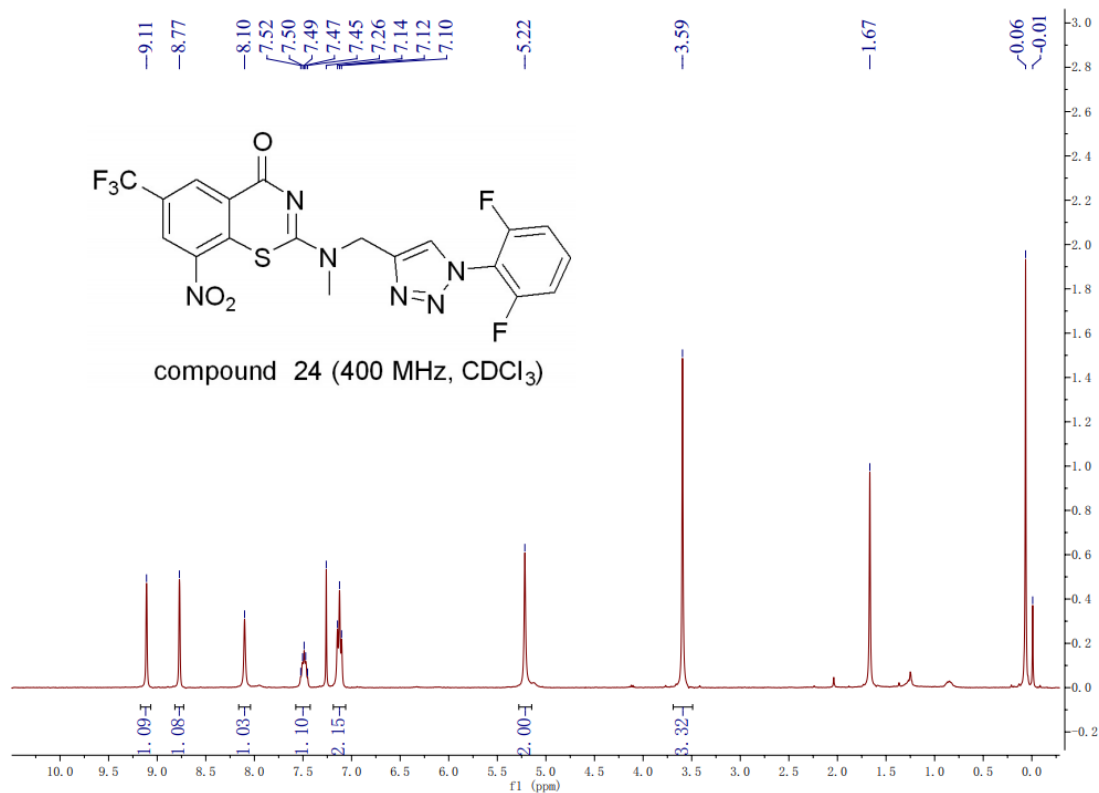

<sup>13</sup>C NMR of Compound 24

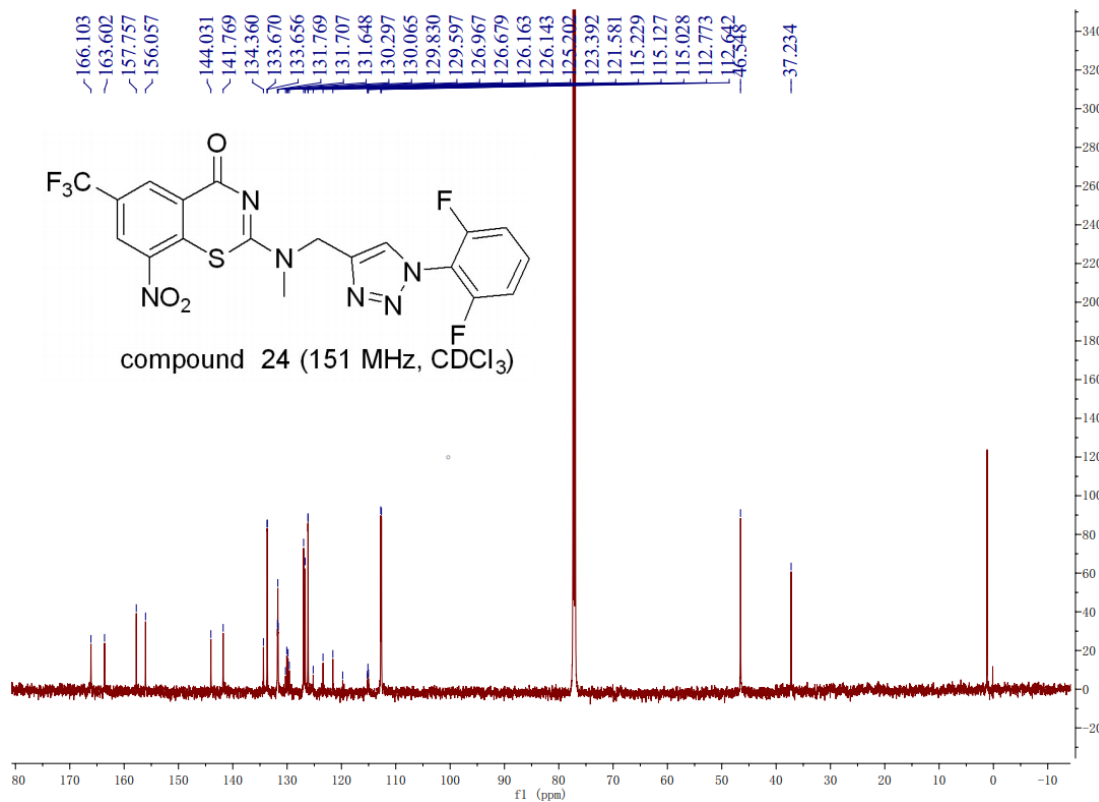

<sup>1</sup>H NMR of Compound 25

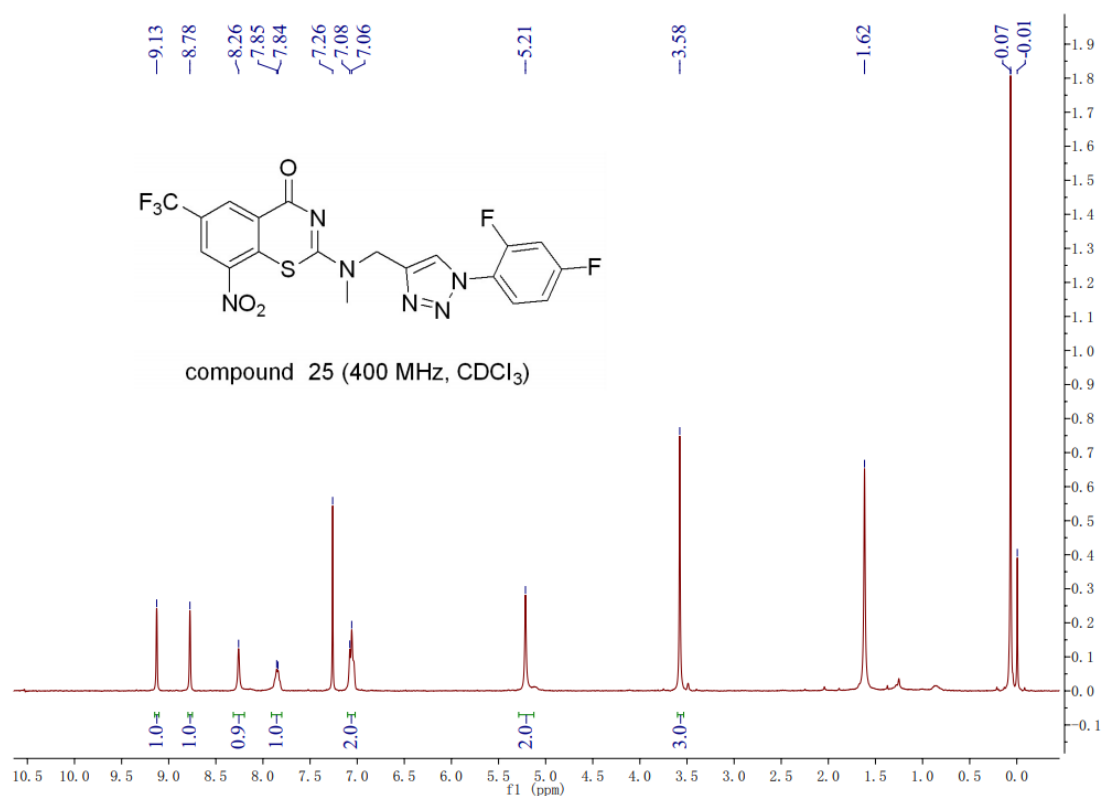

<sup>13</sup>C NMR of Compound 25

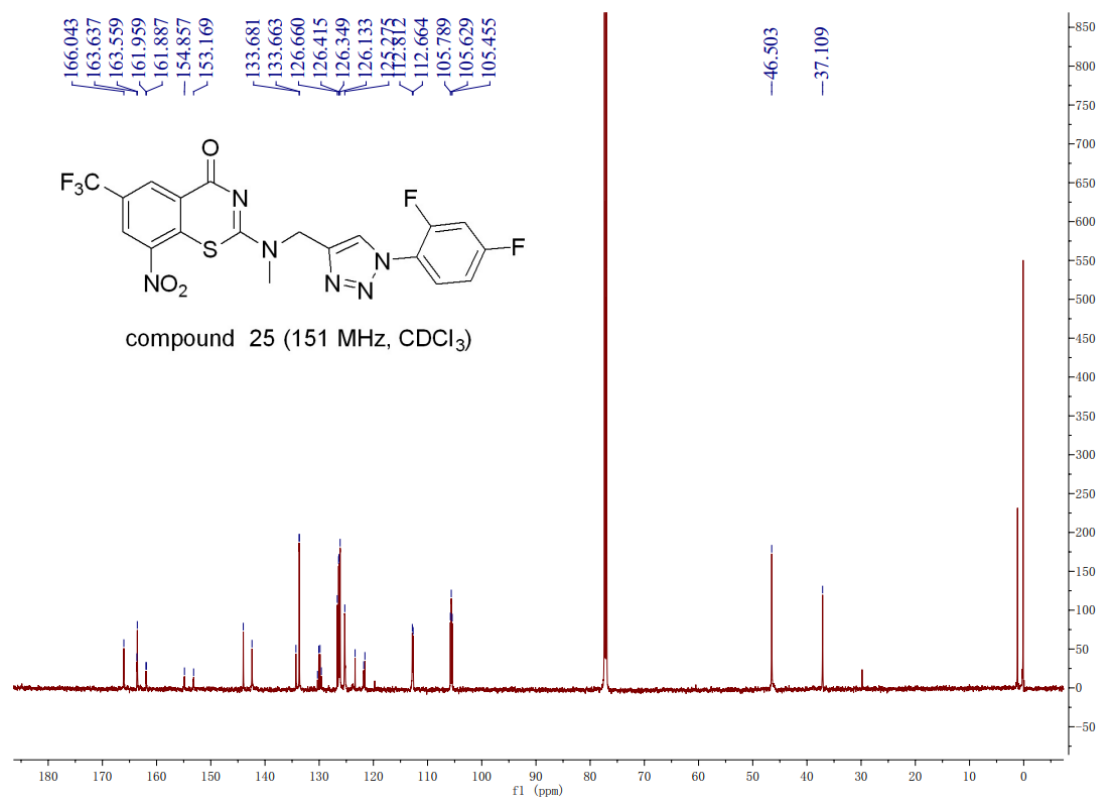

<sup>1</sup>H NMR of Compound 26

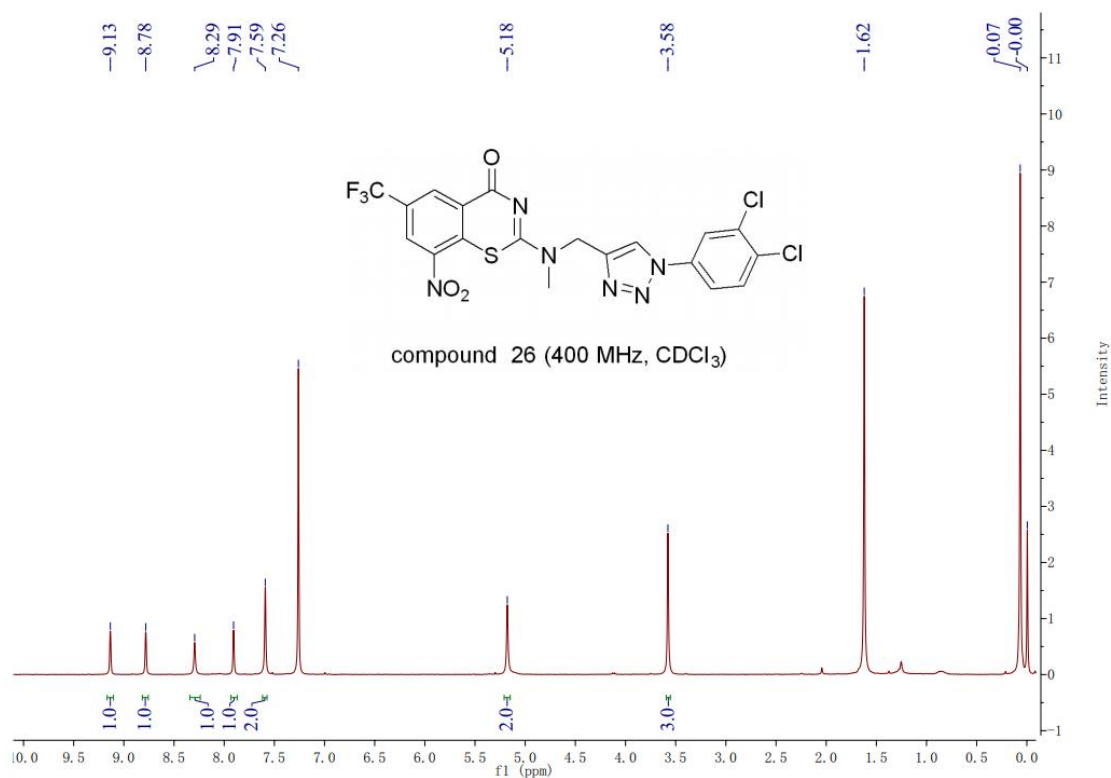

<sup>13</sup>C NMR of Compound 26

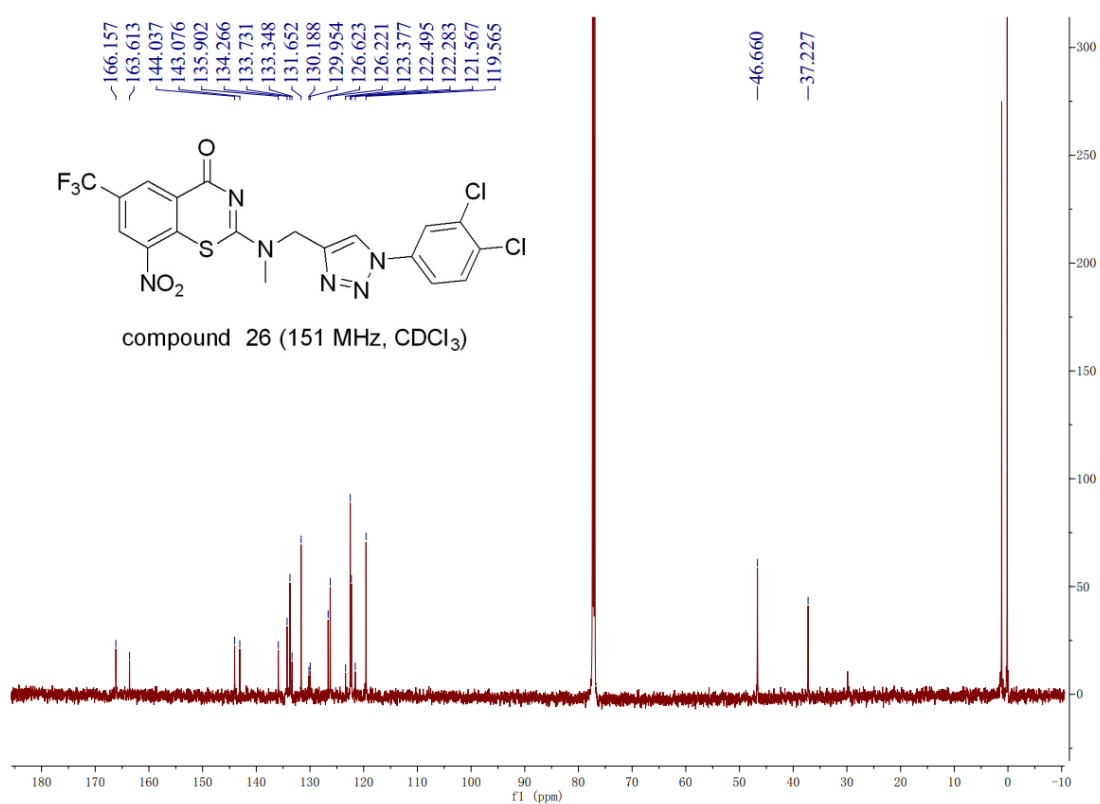

<sup>1</sup>H NMR of Compound 27

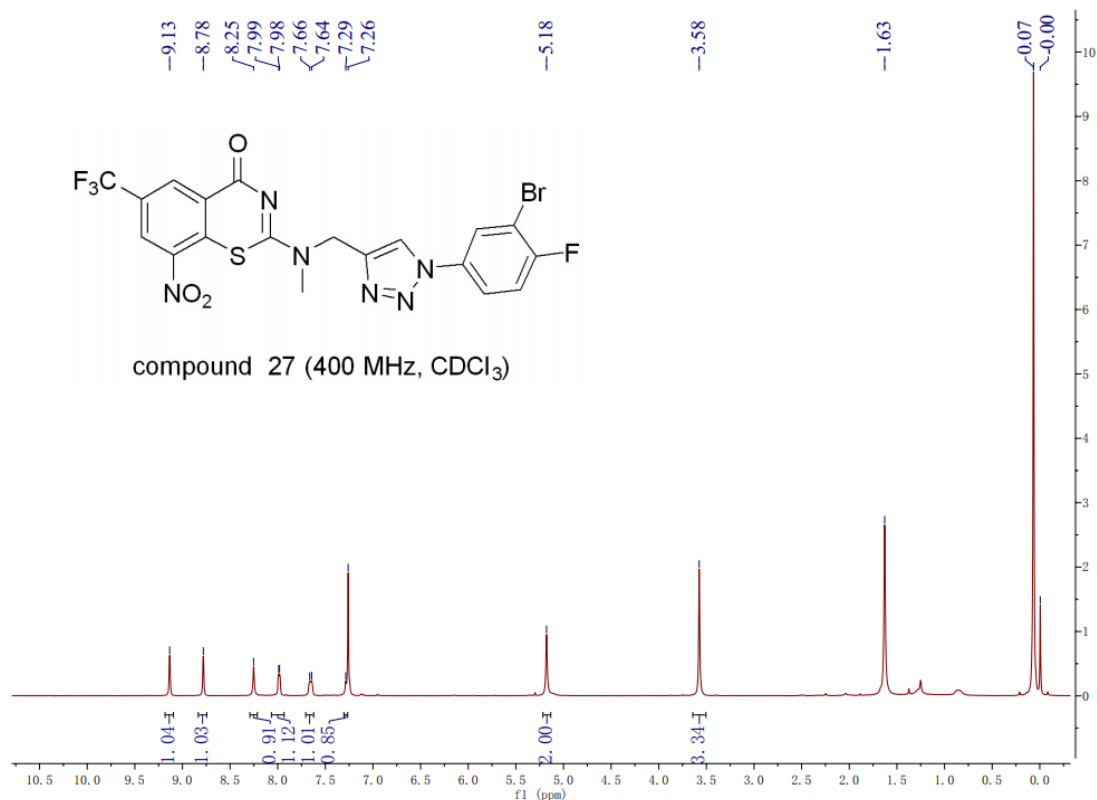

<sup>13</sup>C NMR of Compound 27

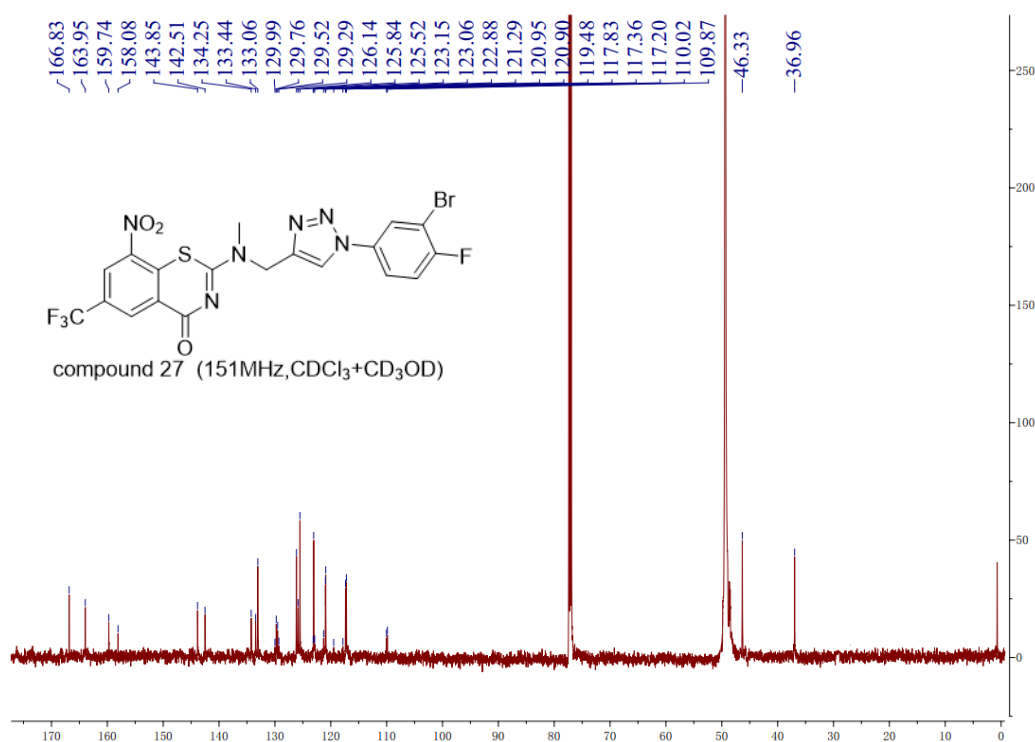

<sup>1</sup>H NMR of Compound 28

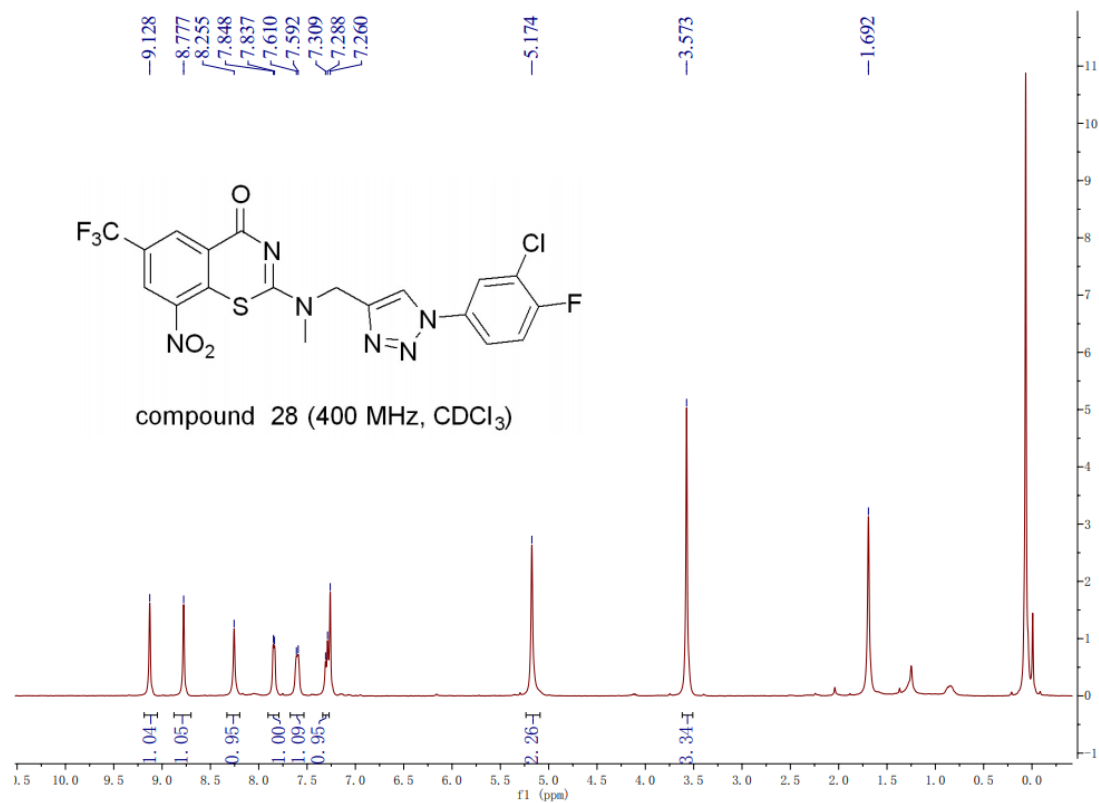

<sup>13</sup>C NMR of Compound 28

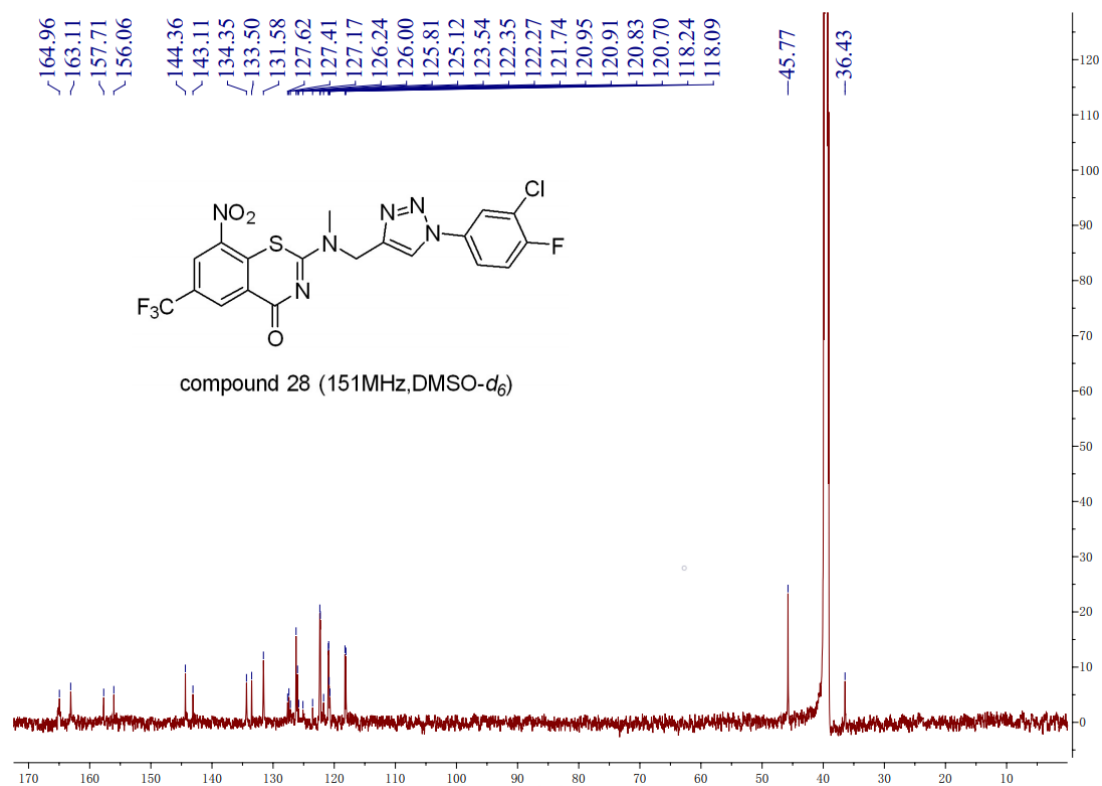

<sup>1</sup>H NMR of Compound 29

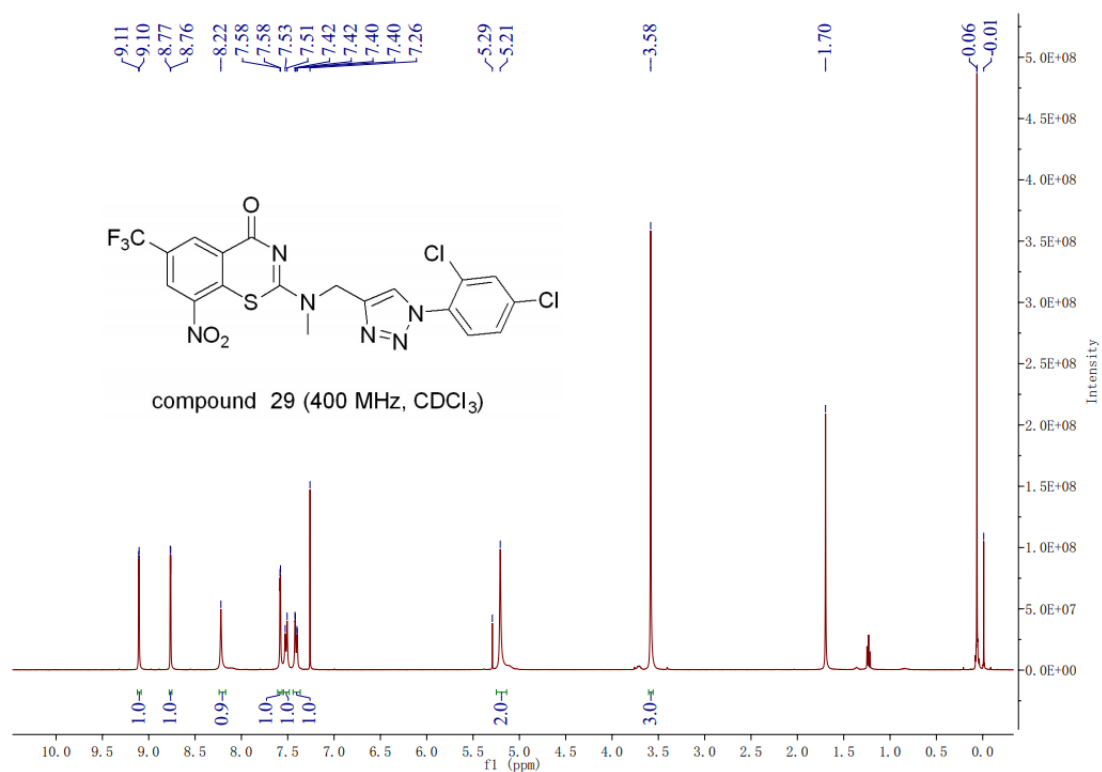

<sup>13</sup>C NMR of Compound 29

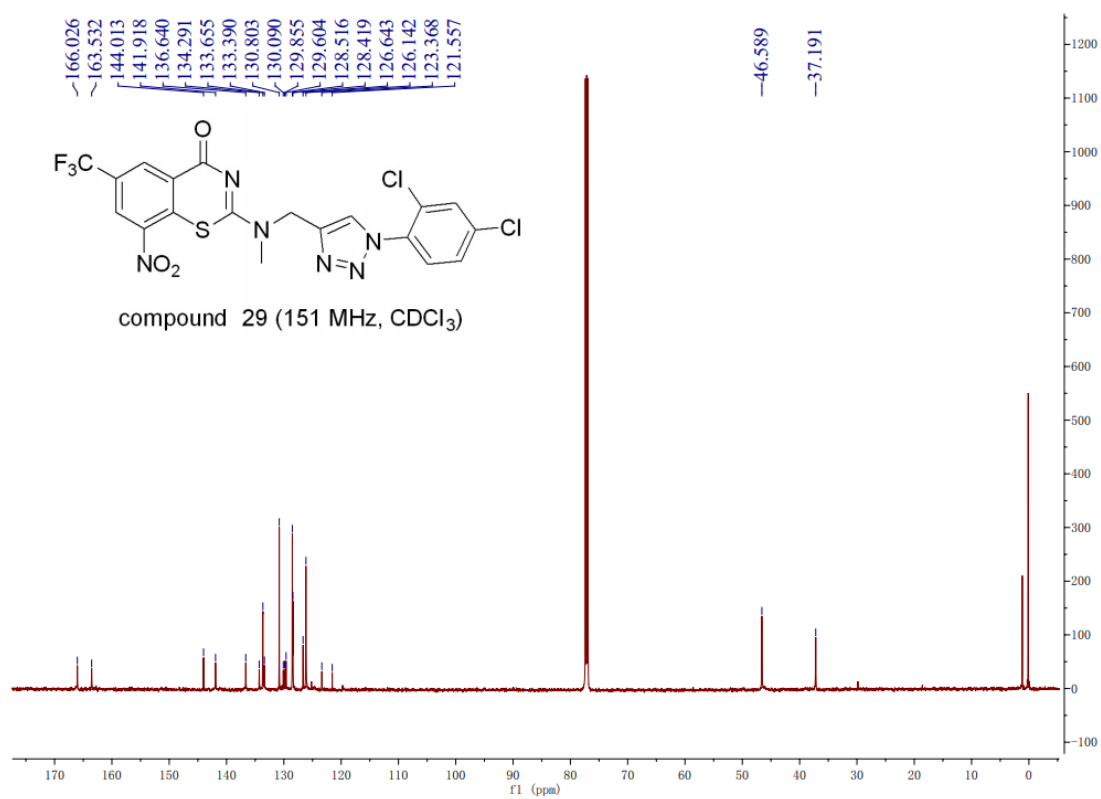

<sup>1</sup>H NMR of Compound 30

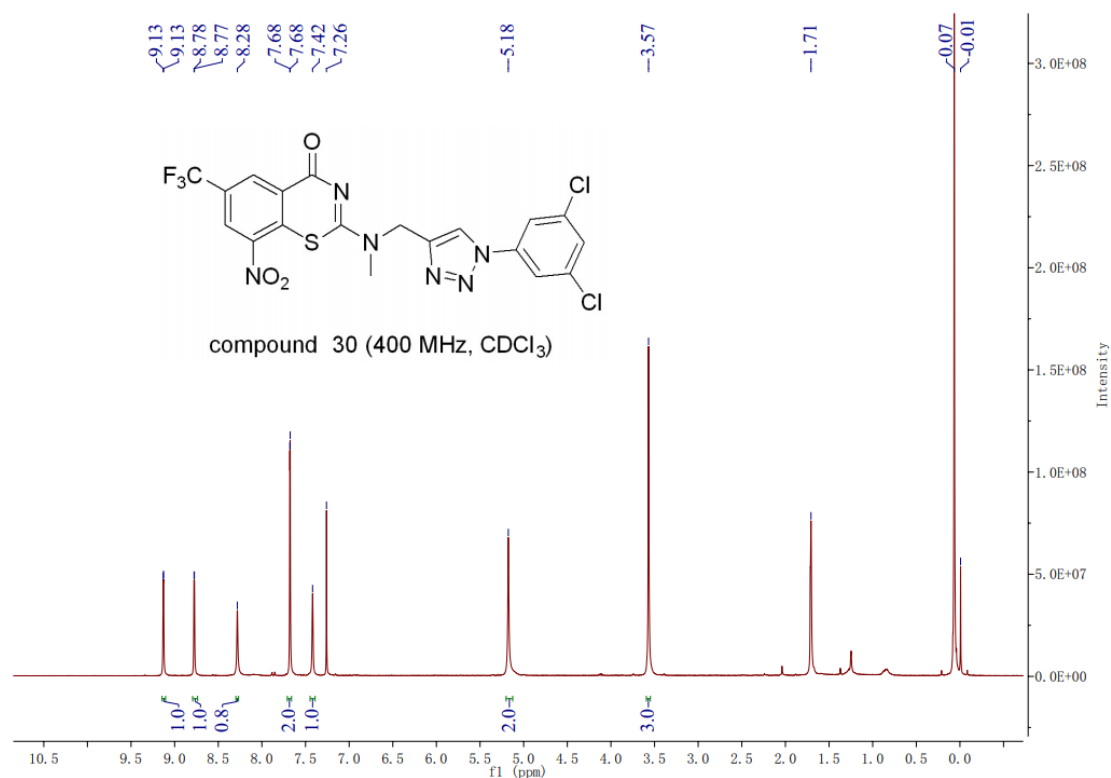

<sup>13</sup>C NMR of Compound 30

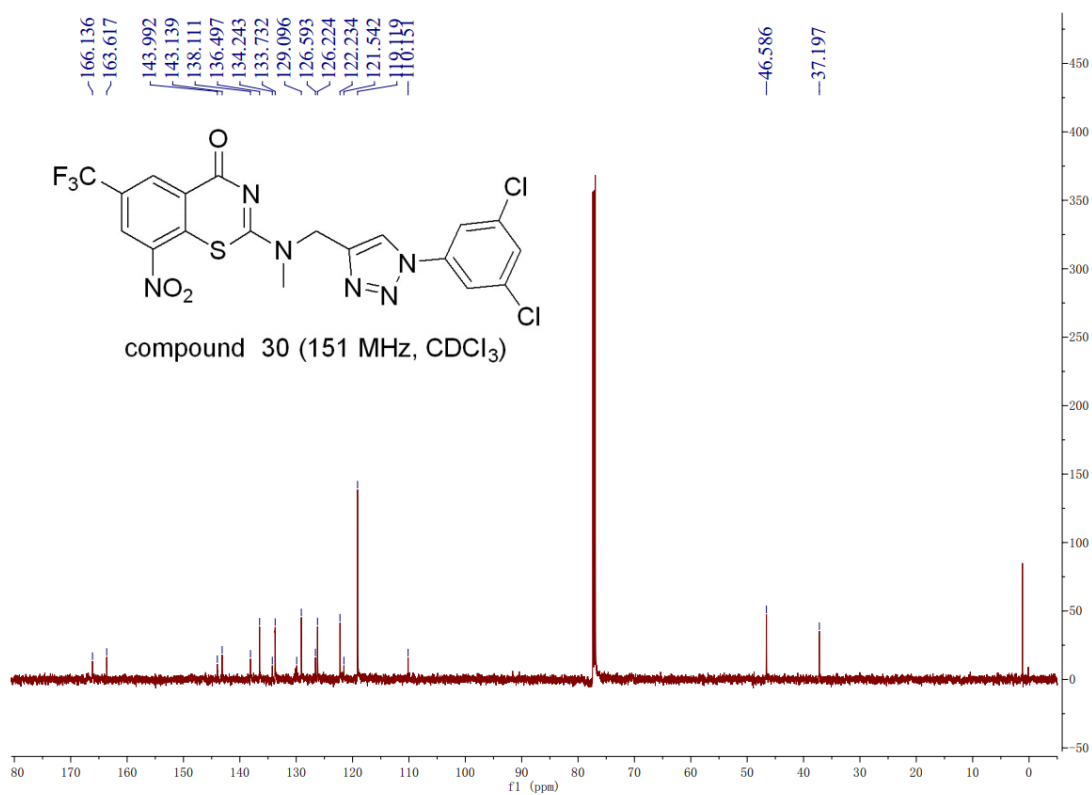

<sup>1</sup>H NMR of Compound 31

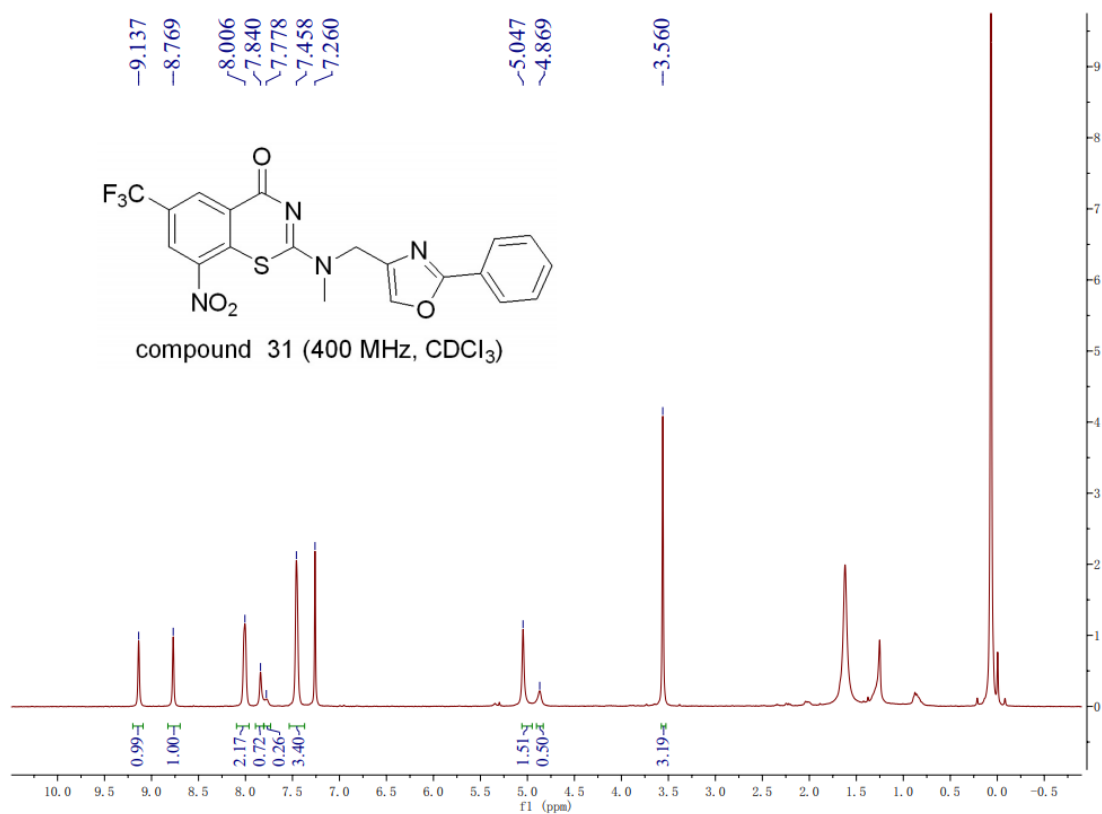

<sup>13</sup>C NMR of Compound 31

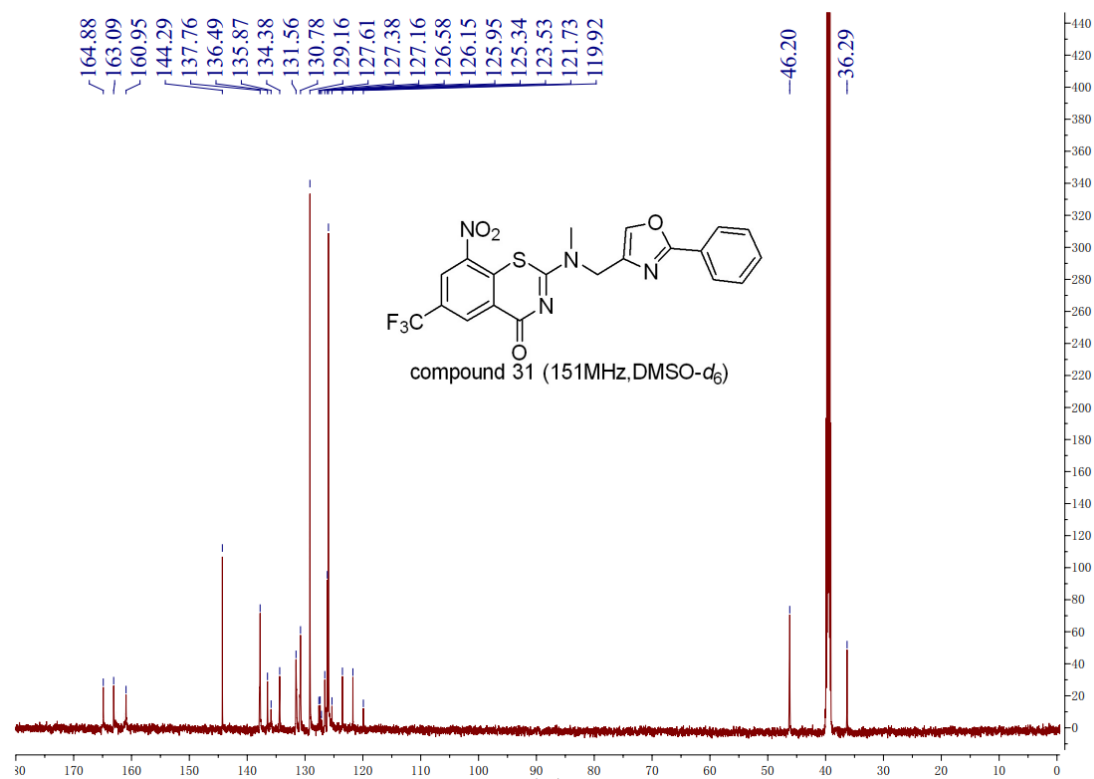

<sup>1</sup>H NMR of Compound 32

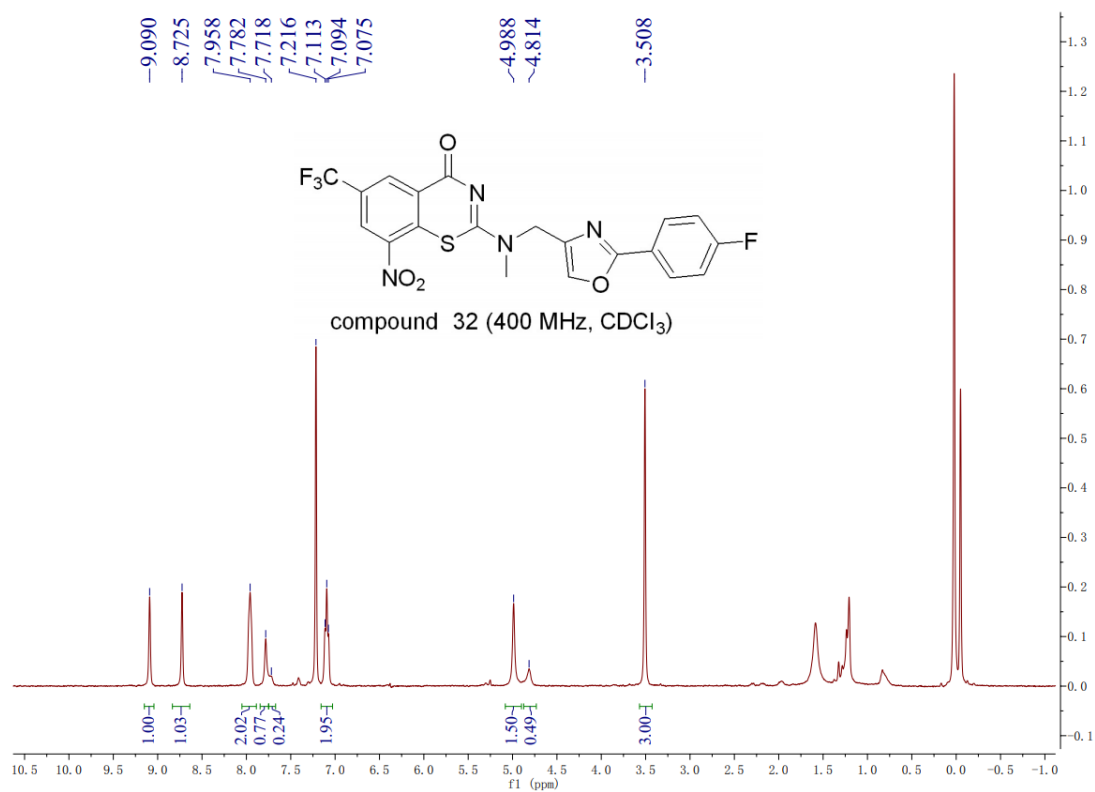

<sup>13</sup>C NMR of Compound 32

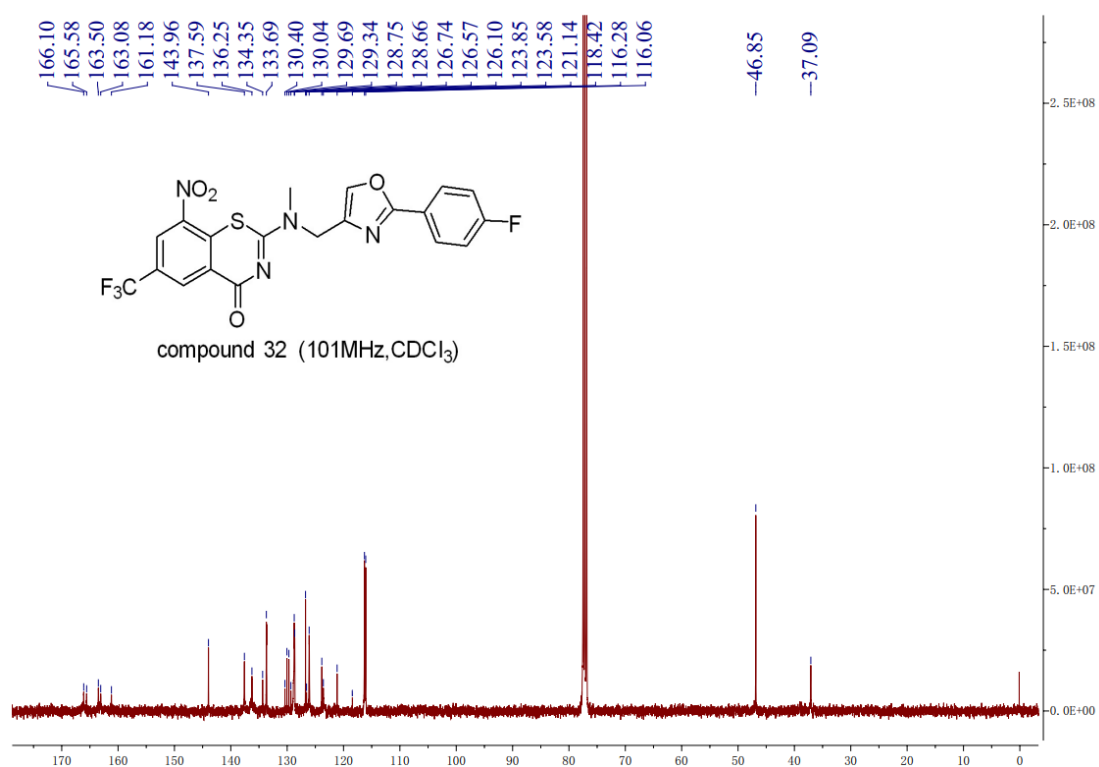

<sup>1</sup>H NMR of Compound 33

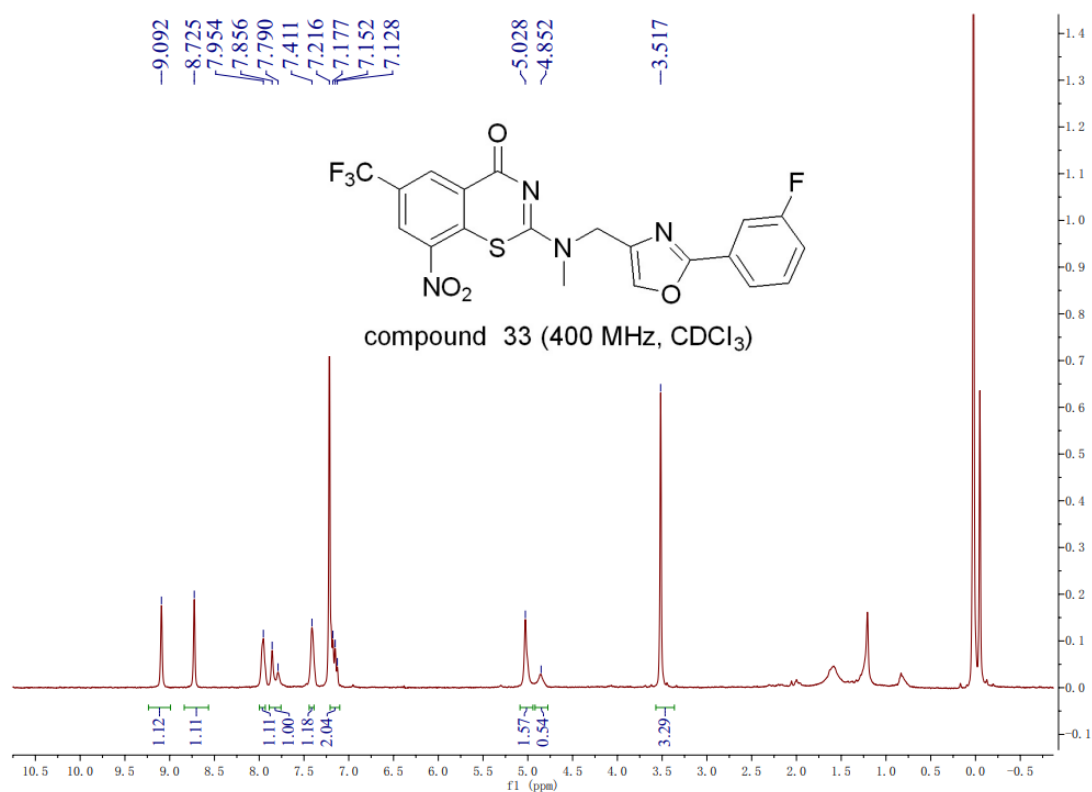

<sup>13</sup>C NMR of Compound 33

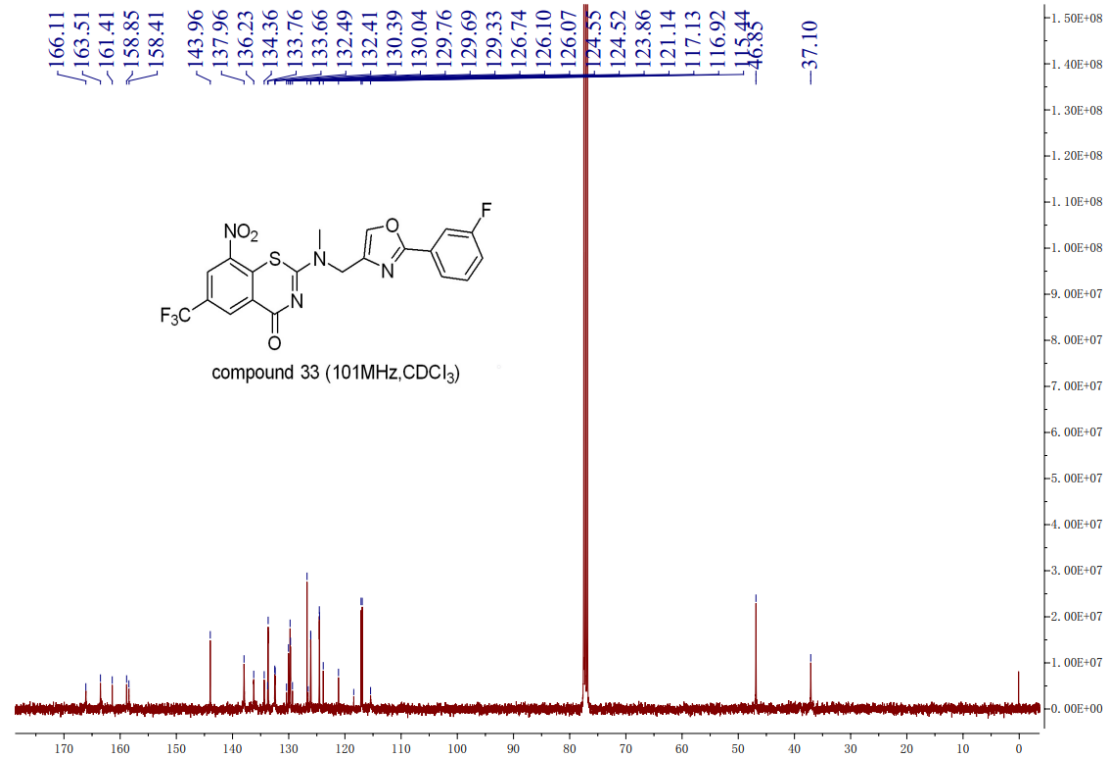

<sup>1</sup>H NMR of Compound 34

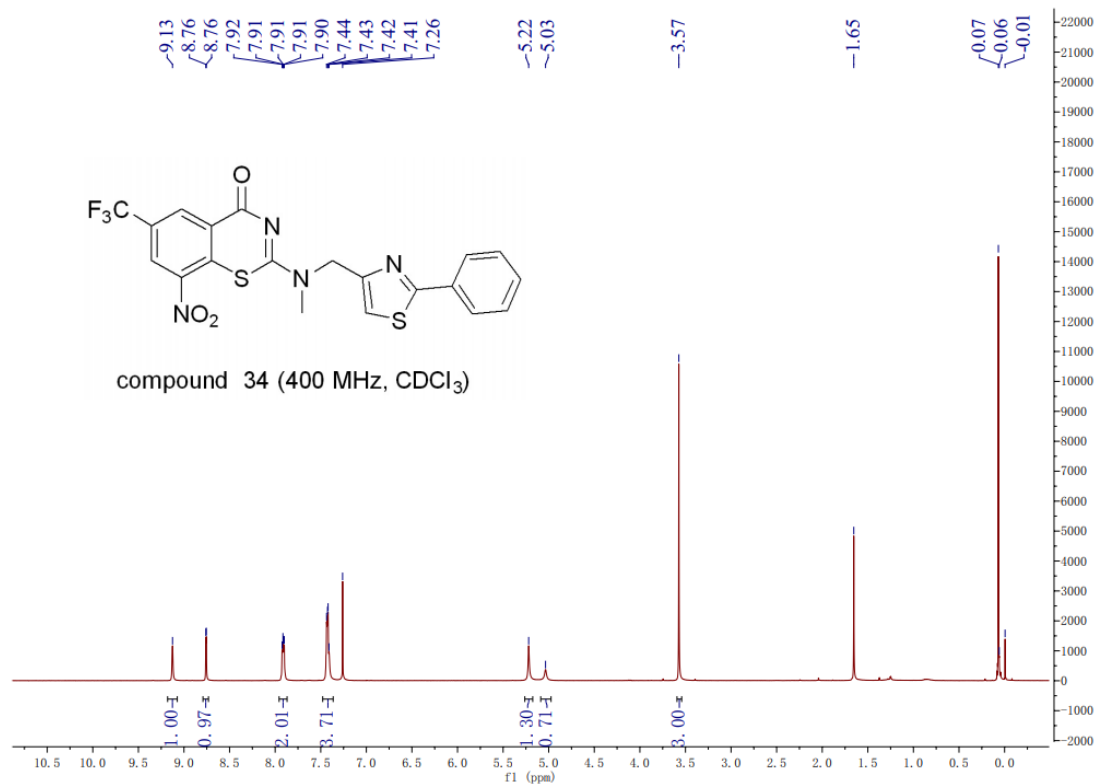

<sup>13</sup>C NMR of Compound 34

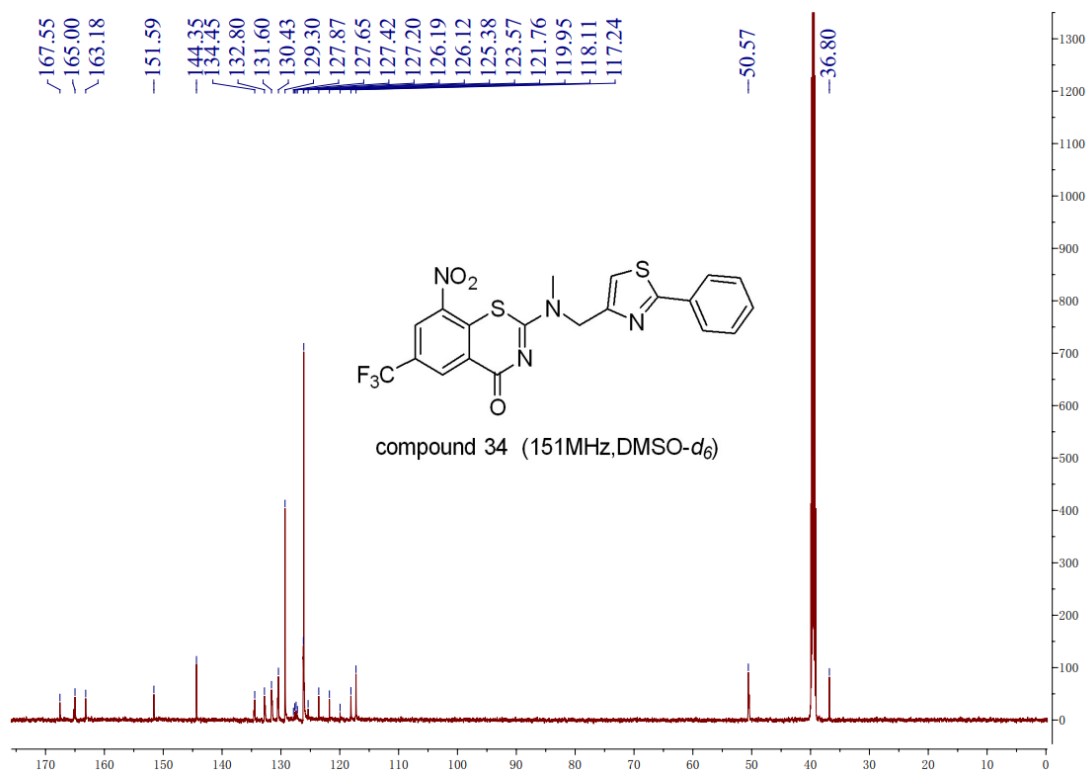

<sup>1</sup>H NMR of Compound 35

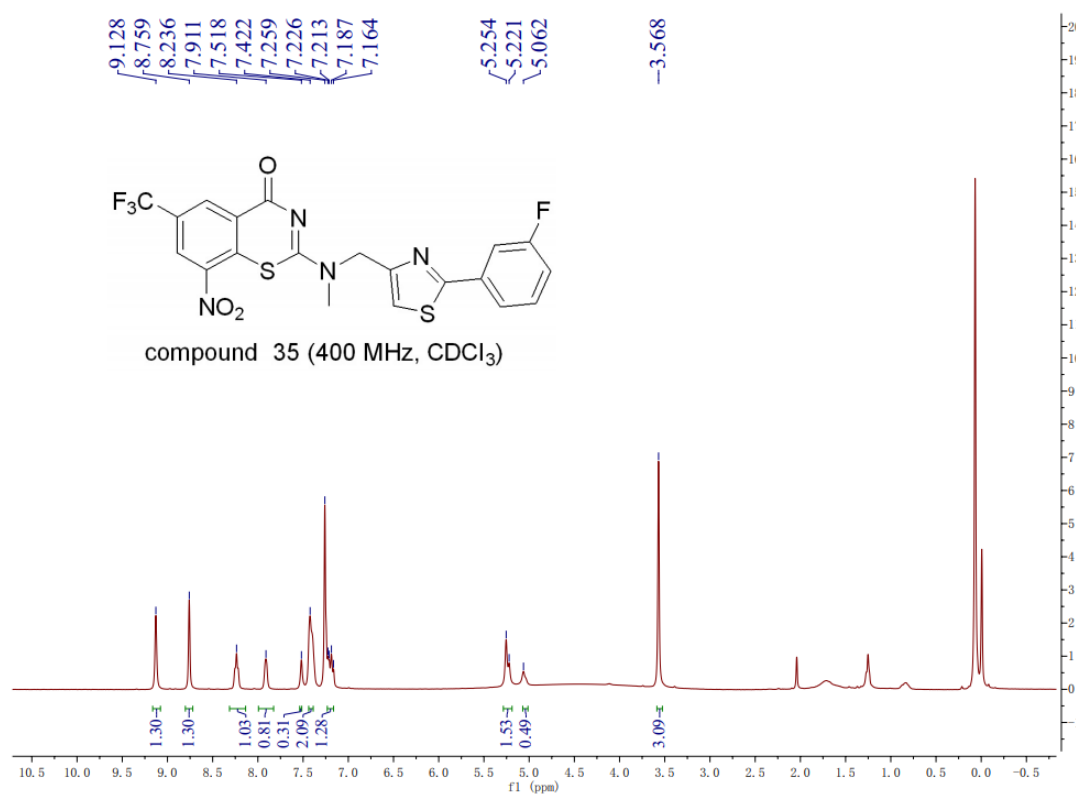

<sup>13</sup>C NMR of Compound 35

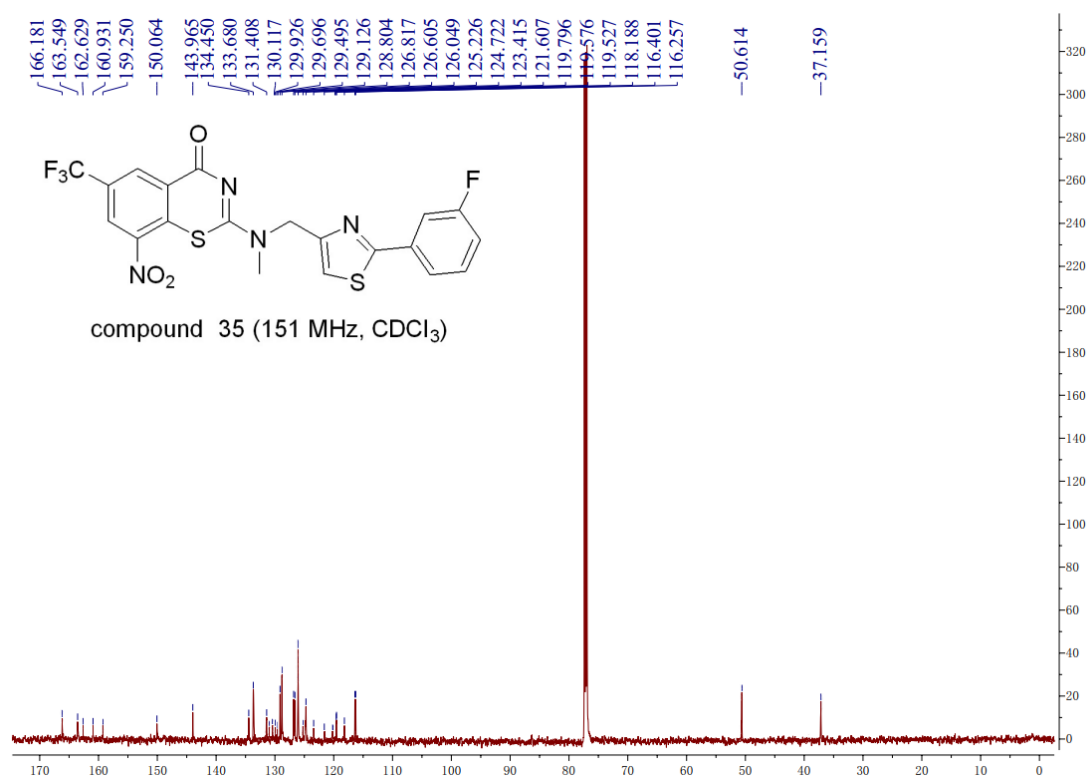

<sup>1</sup>H NMR of Compound 36

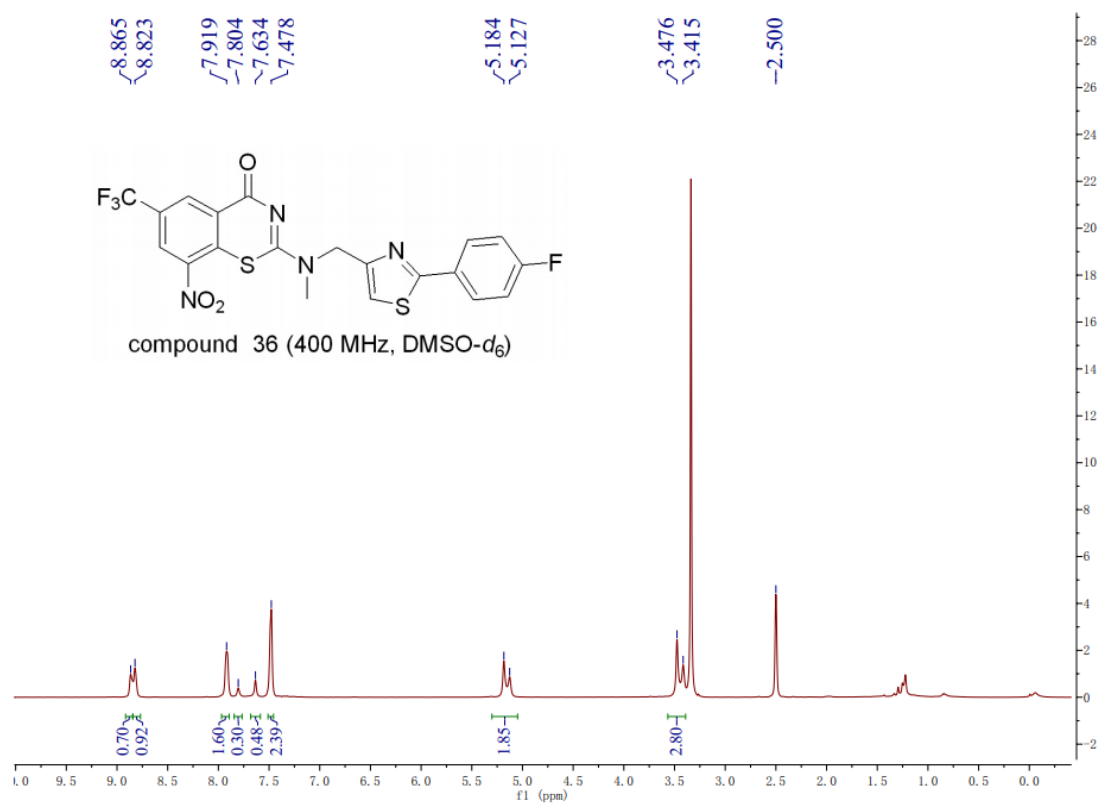

<sup>13</sup>C NMR of Compound 36

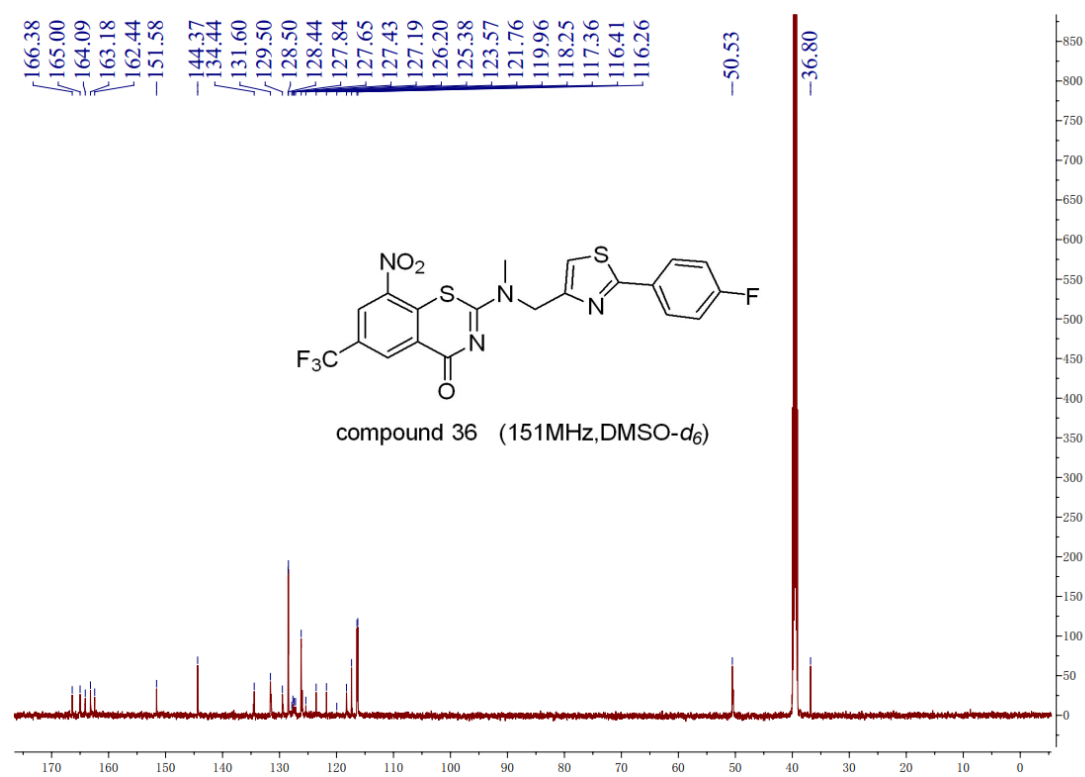

<sup>1</sup>H NMR of Compound 37

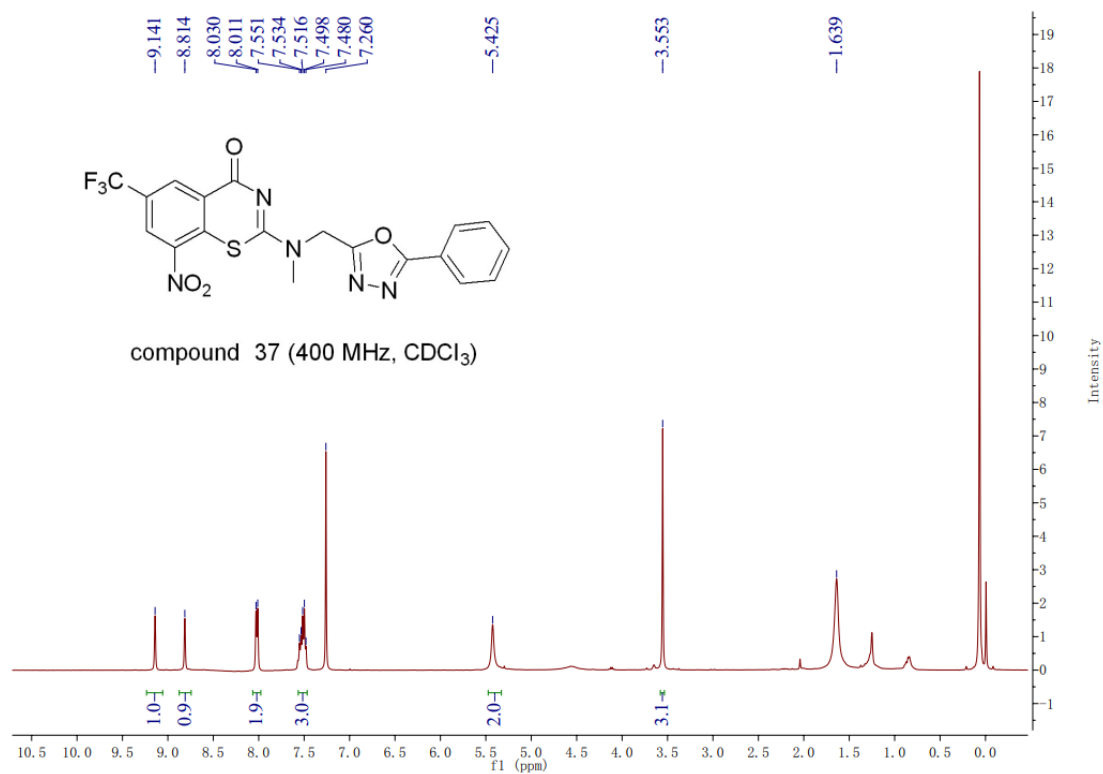

<sup>13</sup>C NMR of Compound 37

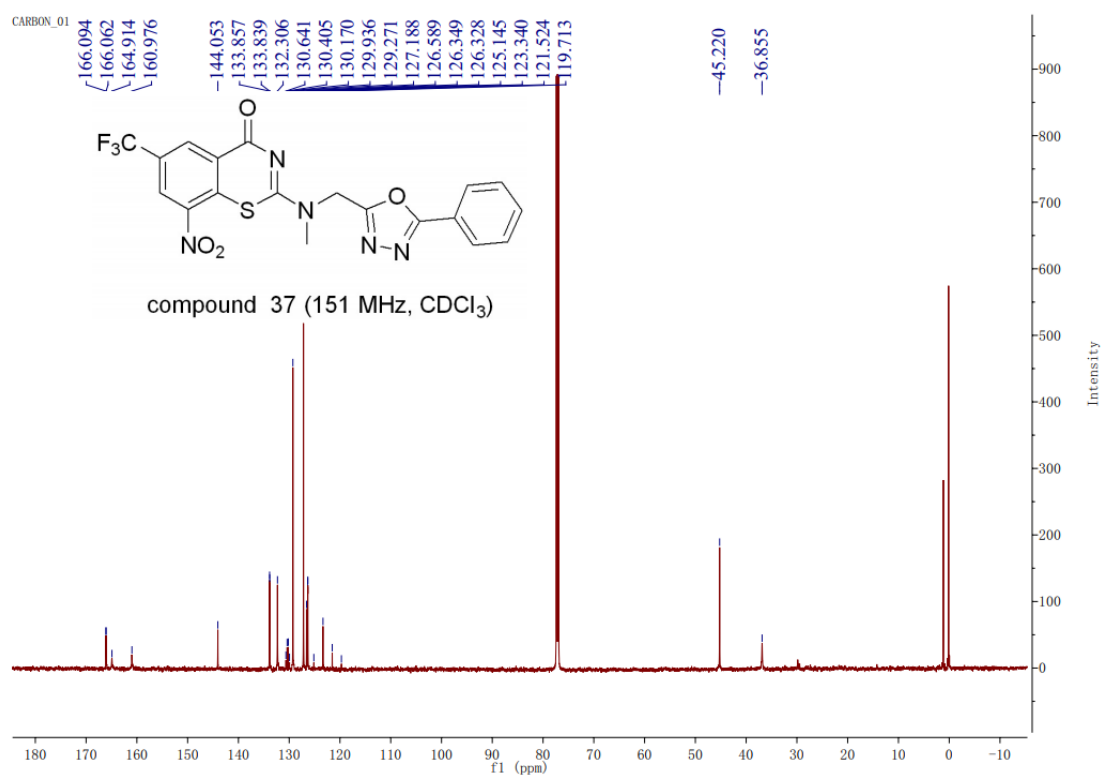

<sup>1</sup>H NMR of Compound 38

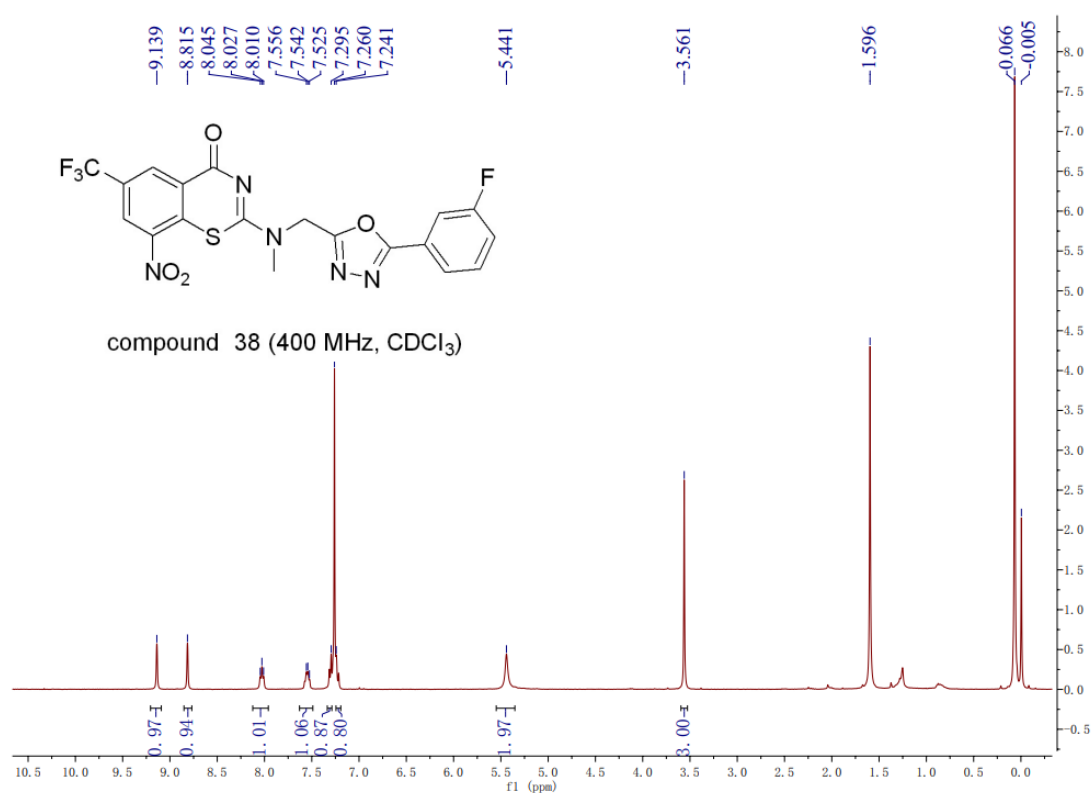

<sup>13</sup>C NMR of Compound 38

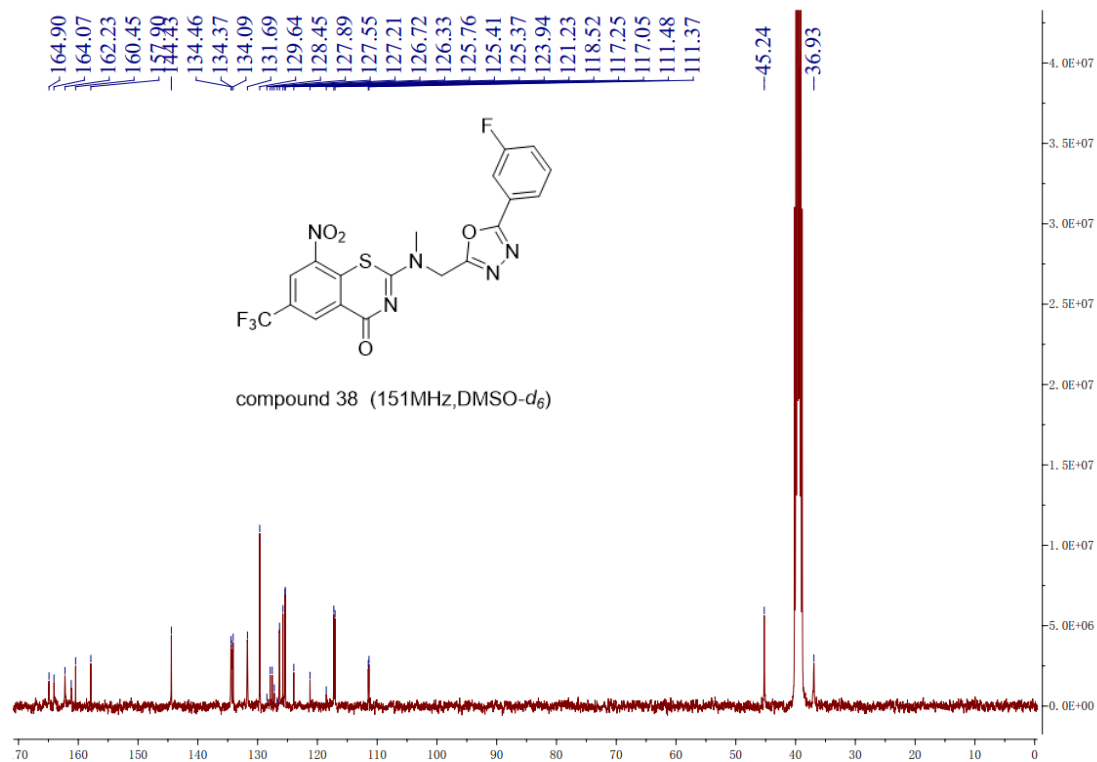

<sup>1</sup>H NMR of Compound 39

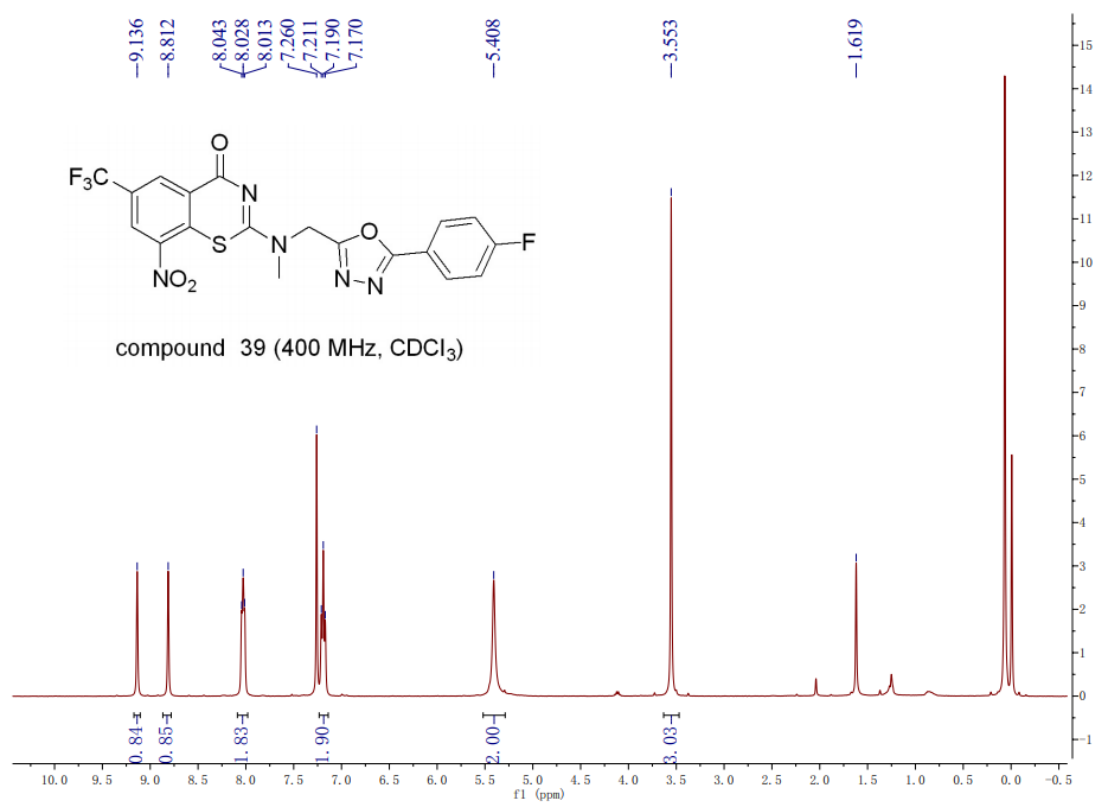

<sup>13</sup>C NMR of Compound 39

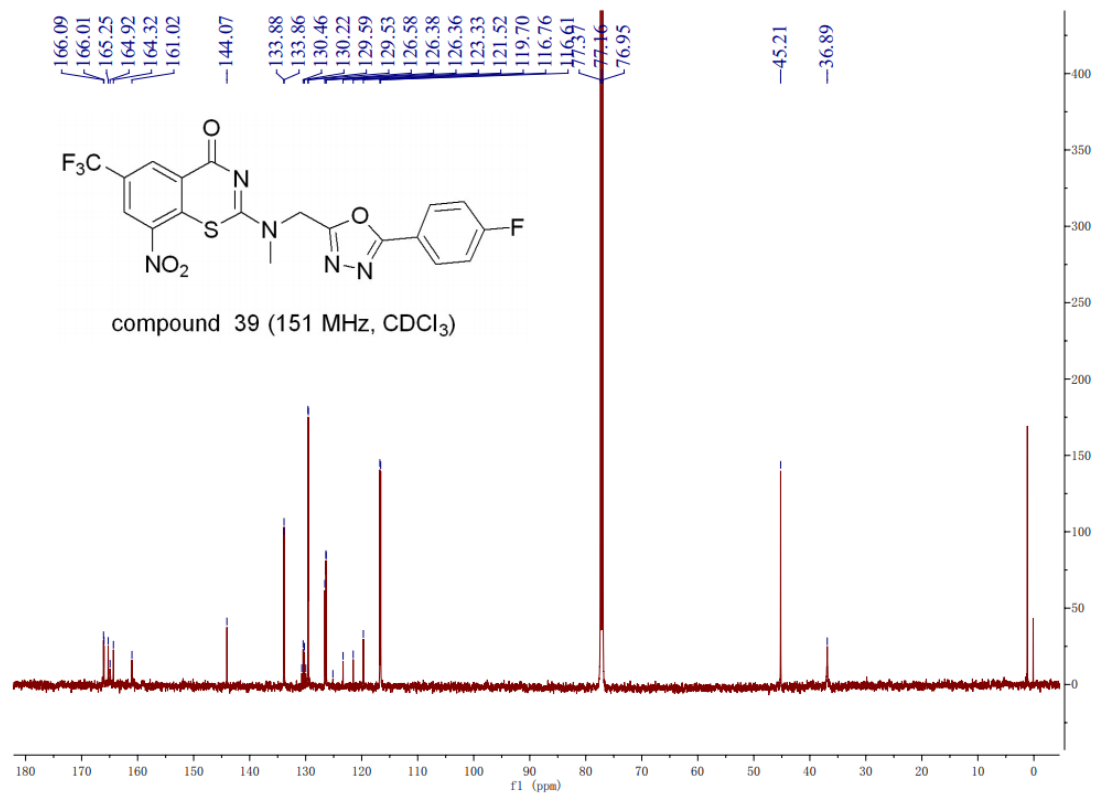

<sup>1</sup>H NMR of Compound 40

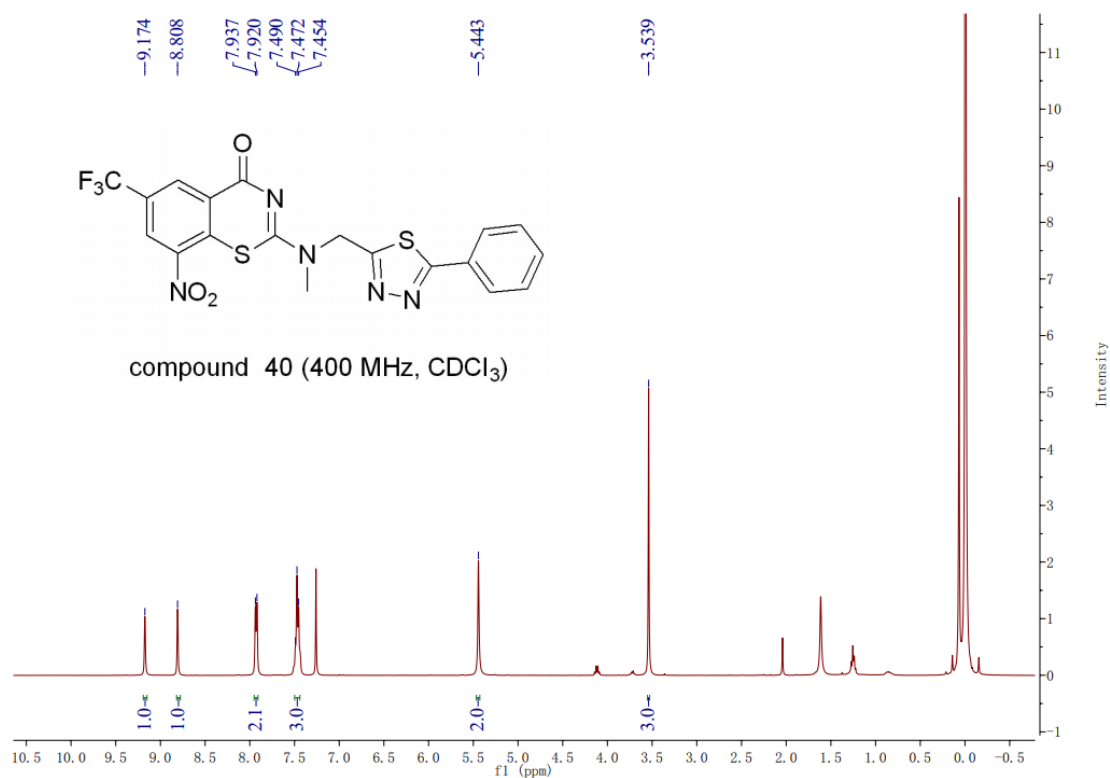

<sup>13</sup>C NMR of Compound 40

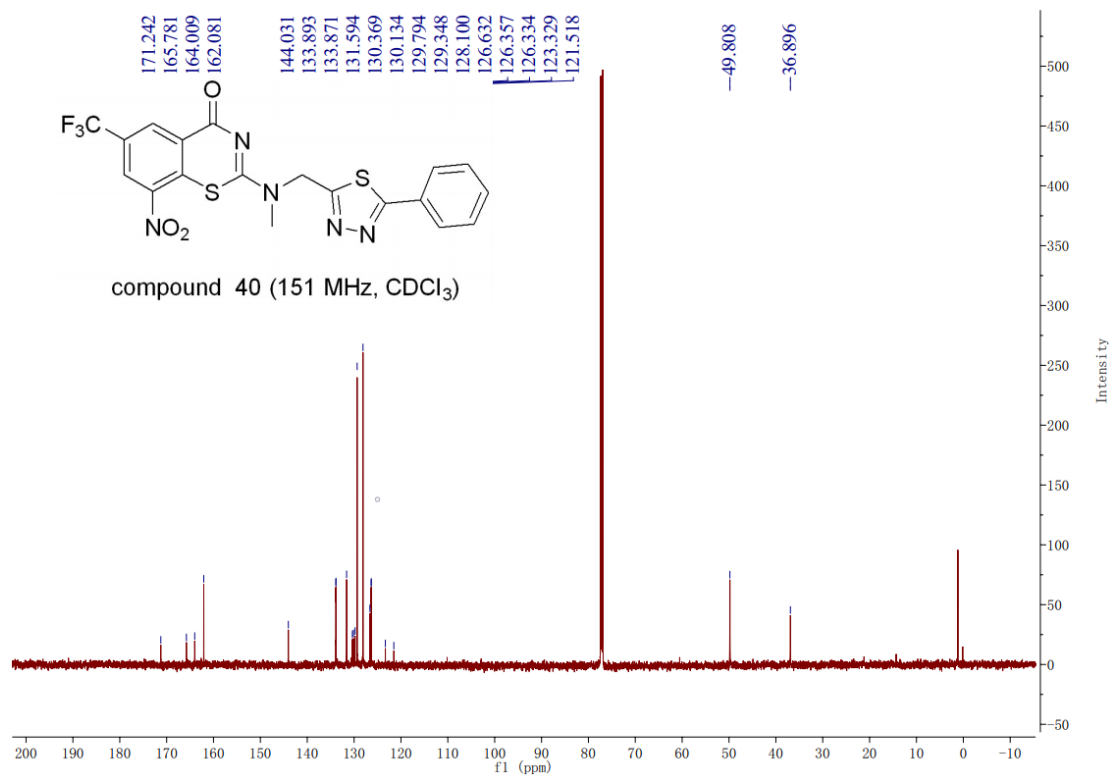

<sup>1</sup>H NMR of Compound 41

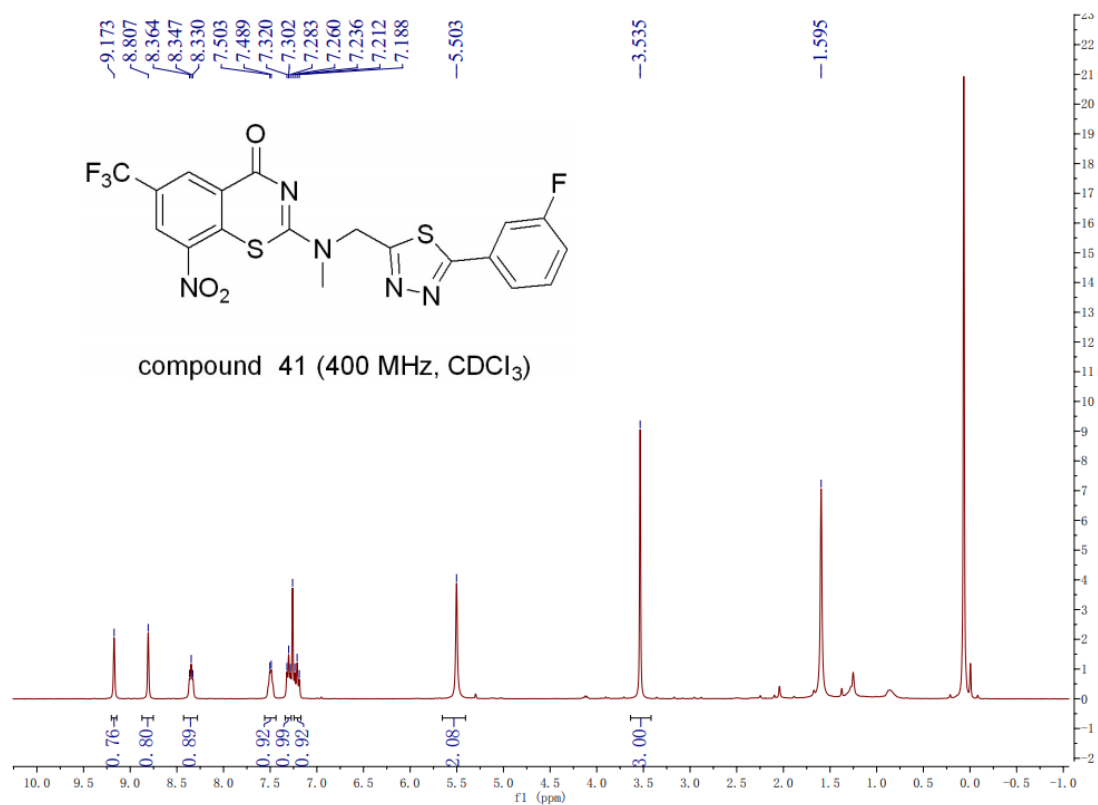

<sup>13</sup>C NMR of Compound 41

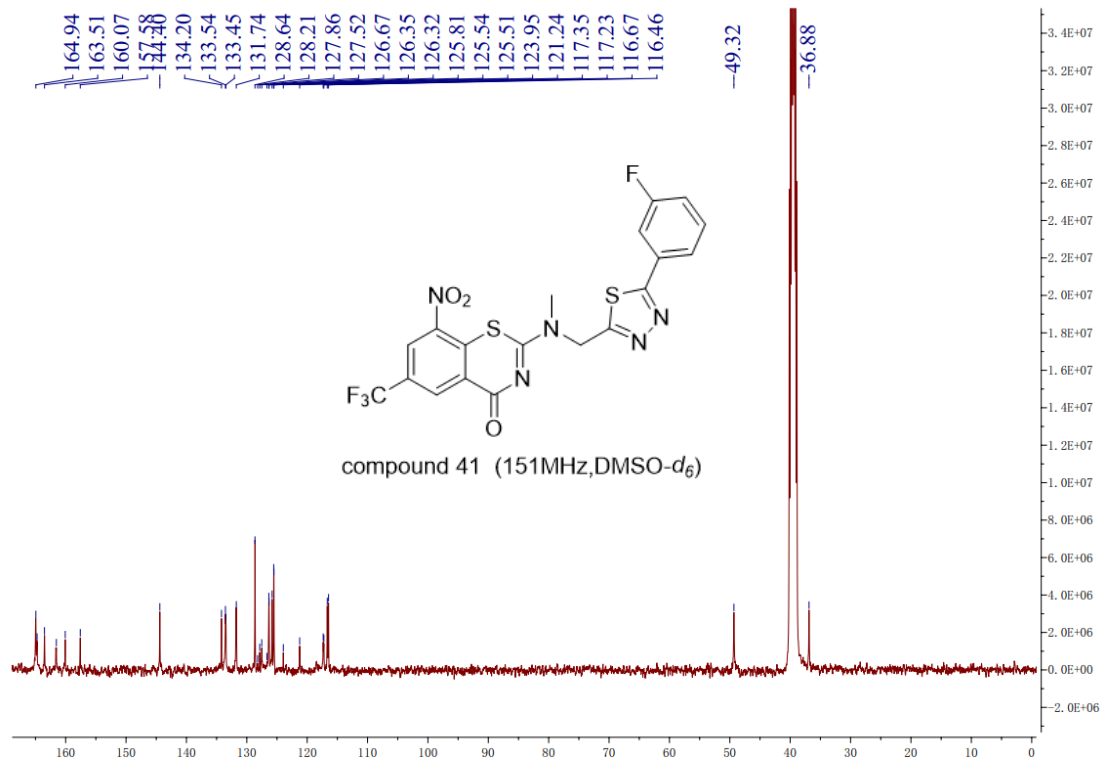

<sup>1</sup>H NMR of Compound 42

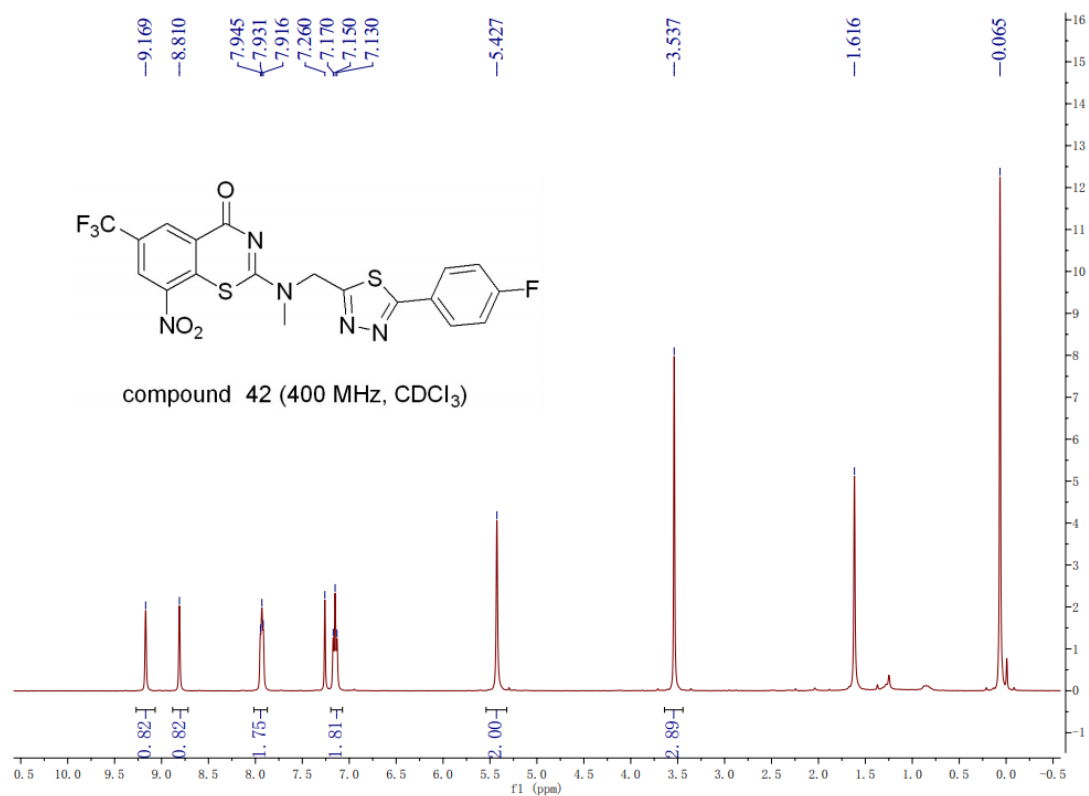

<sup>13</sup>C NMR of Compound 42

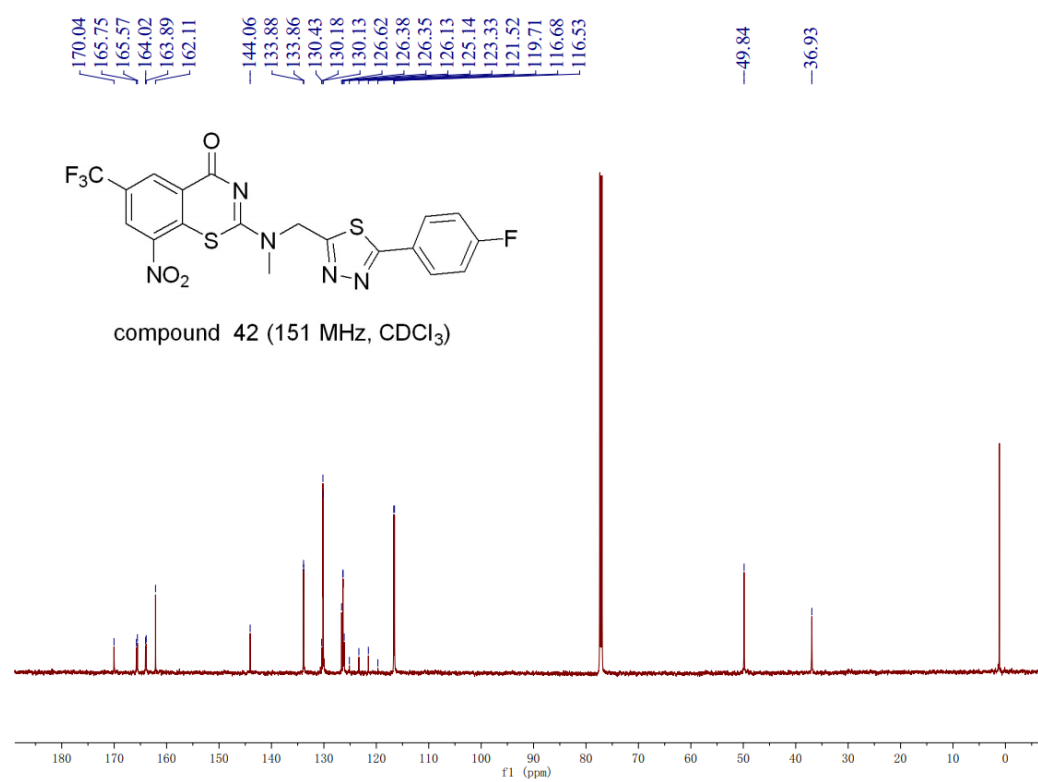

Supplement: Supplementary file 2 [file supplementary › compound H and C spectra.pdf]
