# Supplementary material for: Side Chain-modified Benzothiazinone Derivatives with Anti-Mycobacterial Activity
Source: Preprints.org preprint supplement (doi:10.20944/preprints202305.1839.v1), 2023-05-26
Supplement: Supplementary file 2 [file supplementary]

Archive with 2 entries (2 files):
- Supplementary information-2023-Jan.pdf
- compound H and C spectra.pdf
